# Supplementary material for: A molecular, morphological, and physiological comparison of English and German populations of Calliphora vicina (Diptera: Calliphoridae)
Source: PLoS One. 2018 Dec 3;13(12):e0207188. doi: 10.1371/journal.pone.0207188 (PMC6277095; doi:10.1371/journal.pone.0207188)
Supplement: S1 Data — (XLSX) [file pone.0207188.s001.xlsx]

## Sheet: Eng. larval length
600	C.vicina England, 25 °C				850	C.vicina England, 25 °C				1200	C.vicina England, 25 °C				1450	C.vicina England, 25 °C				1800	C.vicina England, 25 °C				2050	C.vicina England, 25 °C				2400	C.vicina England, 25 °C
	Replicate	Date	Larval length (cm)			Replicate	Date	Larval length (cm)			Replicate	Date	Larval length (cm)			Replicate	Date	Larval length (cm)			Replicate	Date	Larval length (cm)			Replicate	Date	Larval length (cm)			Replicate	Date	Larval length (cm)
	1	11.3.16	0.67			1	11.3.16	0.97			1	12.3.16	1.43			1	12.3.16	1.57			1	13.3.16	1.62			1	13.3.16	1.53			1	14.3.16	1.58
			0.65					0.99					1.52					1.66					1.68					1.6					1.71
			0.64					0.79					1.33					1.57					1.68					1.63					1.81
			0.59					0.92					1.42					1.65					1.64					1.65					1.69
			0.63					0.78					1.45					1.74					1.59					1.68					*NM-->PF
			0.64					0.84					1.41					1.59					1.57					1.66					*NM-->PF
			0.72					0.86					1.43					1.72					1.63					1.42					1.66
			0.6					0.81					1.39					1.55					1.66					1.55					1.73
			0.7	0.0380657				0.74	0.0798749				1.55	0.0752928				1.57	0.0634114				1.61	0.0387943				1.68	0.0864928				1.78
			0.65	0.649				0.8	0.85				1.28	1.421				1.61	1.623				1.57	1.625				1.73	1.613				1.73
	2	29.3.16	0.73			2	29.3.16	0.77			2	30.3.16	1.33			2	30.3.16	1.79			2	31.3.16	1.69			2	31.3.16	1.59			2	1.4.16	1.39
			0.75					0.99					1.69					1.78					1.78					1.5					1.6
			0.58					1.01					1.11					1.64					1.75					1.68					1.78
			0.59					0.89					1.63					1.62					1.94					1.8					1.58
			0.76					1.09					1.52					1.68					1.63					1.74					1.48
			0.71					1.02					1.63					1.43					1.79					1.65					1.49
			0.54					0.9					1.29					1.76					1.68					1.8					1.75
			0.61					0.85					1.22					1.73					1.84					1.78					1.84
			0.69					0.93					1.31					1.65					1.66					1.81					1.8
			0.66					0.78					1.38					1.82					1.68					1.79					1.54
	3	12.4.16	0.7			3	12.4.16	1.15			3	13.4.16	1.53			3	13.4.16	0.76			3	14.4.16	1.64			3	14.4.16	1.78			3	15.4.16	1.67
			0.73					1.26					1.56					1.14					1.65					1.83					1.68
			0.79					1.29					1.39					1.15					1.71					1.83					1.29
			0.65					1.23					1.35					1.33					1.75					1.73					1.62
			0.73					0.85					1.44					1.2					1.78					1.4					*NM-->PF
			0.78					0.74					1.51					1.54					1.84					1.59					*NM-->PF
			0.74					1.22					1.54					1.79					1.75					1.73					*NM-->PF
			0.62					1.04					1.56					1.72					1.79					1.7					*NM-->PF
			0.8					0.97					1.36					1.67					1.74					1.65					*NM-->PF
			0.75					0.85					1.42					1.63					1.49					1.79					*NM-->PF
		Mean	0.676604					0.931923					1.42694					1.54663					1.69177					1.67262					1.63926
		SD	0.0675278					0.157685					0.126674					0.232934					0.0936192					0.114319					0.138817
600	C.vicina England, 16 °C				850	C.vicina England, 16 °C				1200	C.vicina England, 16 °C				1450	C.vicina England, 16 °C				1800	C.vicina England, 16 °C				2050	C.vicina England, 16 °C				2400	C.vicina England, 16 °C
	Replicate	Date	Larval length (cm)			Replicate	Date	Larval length (cm)			Replicate	Date	Larval length (cm)			Replicate	Date	Larval length (cm)			Replicate	Date	Larval length (cm)			Replicate	Date	Larval length (cm)			Replicate	Date	Larval length (cm)
	1	18.3.16	0.38			1	19.3.16	0.62			1	20.3.16	1.1			1	21.3.16	1.35			1	22.3.16	1.78			1	23.3.16	1.59			1	24.3.16	1.68
			0.35					0.75					1.15					1.49					1.69					1.64					1.65
			0.32					0.7					1.19					1.33					1.77					1.68					1.74
			0.3					0.55					0.75					1.42					1.62					1.6					1.61
			0.37					0.54					0.74					1.28					1.7					1.62					1.55
			0.4					0.62					0.92					1.41					1.59					1.54					1.64
			0.39					0.7					0.77					1.44					1.76					1.55					1.72
			0.38					0.74					0.98					1.38					1.74					1.64					1.64
			0.4	0.0343511				0.62	0.0698284				0.85	0.160028				1.44	0.0623618				1.64	0.0825893				1.66	0.0471169				1.66	0.0511957
			0.41	0.37				0.68	0.652				0.84	0.929				1.47	1.401				1.88	1.717				1.68	1.62				1.68	1.657
	2		0.61			2		0.75			2		1.28			2		1.27			2		1.73			2		1.76			2		*NM-->PF
			0.51					0.74					1.31					1.64					1.78					1.78					*NM-->PF
			0.65					0.83					1.2					1.35					1.68					1.6					*NM-->PF
			0.52					0.82					1.24					1.48					1.67					1.79					*NM-->PF
			0.59					0.7					1.32					1.52					1.75					1.78					*NM-->PF
			0.54					0.78					1.24					1.5					1.6					1.83					*NM-->PF
			0.65					0.8					1.29					1.57					1.64					1.71					*NM-->PF
			0.63					0.78					1.01					1.6					1.75					1.89					*NM-->PF
			0.63					0.77					1.37					1.54					1.7					1.71					*NM-->PF
			0.52					0.74					1.29					1.53					1.69					1.74					*NM-->PF
	3	5.5.16	0.47			3	5.5.16	0.75			3	6.5.16	1.06			3	7.5.16	1.38			3	8.5.16	1.57			3	8.5.16	1.64			3	9.5.16	1.87
			0.57					0.77					0.88					1.3					1.6					1.78					1.83
			0.63					0.78					1.01					1.4					1.73					1.8					1.84
			0.61					0.75					1.15					1.33					1.75					1.85					1.79
			0.59					0.78					0.88					1.43					1.72					1.78					1.85
			0.64					0.76					1.04					1.16					1.68					1.75					1.85
			0.58					0.79					1.05					1.48					1.69					1.81					1.74
			0.59					0.68					1.09					1.53					1.6					1.85					1.68
			0.62					0.78					1.19					1.65					1.77					1.85					1.79
			0.54					0.76					1.14					1.49					1.73					1.76					1.88
		Mean	0.513					0.727667					1.07767					1.43867					1.7					1.722					1.7345
		SD	0.11109					0.0726491					0.181267					0.111795					0.069618					0.0954079					0.0953664
600	C.vicina England, RT 18 °C				850	C.vicina England, 18 °C				1200	C.vicina England, 18 °C				1450	C.vicina England, 18 °C				1800	C.vicina England, 18 °C				2050	C.vicina England, 18 °C				2400	C.vicina England, 18 °C
	Replicate	Date	Larval length (cm)			Replicate	Date	Larval length (cm)			Replicate	Date	Larval length (cm)			Replicate	Date	Larval length (cm)			Replicate	Date	Larval length (cm)			Replicate	Date	Larval length (cm)			Replicate	Date	Larval length (cm)
	1	29.3.16	0.61			1	30.3.16	0.8			1	31.3.16	1.23			1	1.4.16	1.79			1	2.4.16	1.75			1	3.4.16	1.65			1	4.4.16	1.69
			0.54					0.79					1.31					1.47					1.62					1.74					1.64
			0.55					0.65					1.33					1.69					1.33					1.79					1.68
			0.66					0.84					1.08					1.78					1.68					1.73					1.85
			0.63					0.83					1.42					1.54					1.66					1.7					1.76
			0.61					0.82					1.31					1.75					1.68					1.77					1.68
			0.53					0.66					1.09					1.61					1.54					1.61					1.8
			0.59					0.64					1.1					1.48					1.51					1.8					1.84
			0.57	0.0407922				0.76	0.0758222				1.04	0.135798				1.76	0.116658				1.47	0.142299				1.66	0.0880057				1.79	0.0930645
			0.55	0.584				0.82	0.761				1.02	1.193				1.62	1.649				1.85	1.609				1.5	1.695				1.54	1.727
600	C.vicina England, RT 21 °C				850	C.vicina England, RT 21 °C				1200	C.vicina England, RT 21 °C				1450	C.vicina England, RT 21 °C				1800	C.vicina England, RT 21 °C				2050	C.vicina England, RT 21 °C				2400	C.vicina England, RT 21 °C
	Replicate	Date	Larval length (cm)			Replicate	Date	Larval length (cm)			Replicate	Date	Larval length (cm)			Replicate	Date	Larval length (cm)			Replicate	Date	Larval length (cm)			Replicate	Date	Larval length (cm)			Replicate	Date	Larval length (cm)
	2	7.5.16	0.76			2	8.5.16	0.82			2	8.5.16	1.68			2	9.5.16	1.35			2	9.5.16	1.68			2	10.5.16	1.72			2	11.5.16	*NM-->PF
			0.77					0.95					1.69					1.74					1.77					1.8					*NM-->PF
			0.77					1.29					1.67					1.79					1.76					1.8					*NM-->PF
			0.75					1.13					1.7					1.8					1.69					1.83					*NM-->PF
			0.78					1.13					1.65					1.77					1.79					1.69					*NM-->PF
			0.76					1.3					1.74					1.78					1.73					1.86					*NM-->PF
			0.75					1.24					1.68					1.76					1.74					1.87					*NM-->PF
			0.79					1.22					1.7					1.72					1.72					1.77					*NM-->PF
			0.78	0.0126886				1.3	0.158808				1.72	0.0279464				1.78	0.127295				1.72	0.0326343				1.83	0.0567098				*NM-->PF
			0.76	0.767				1.32	1.17				1.74	1.697				1.77	1.726				1.75	1.735				1.85	1.802				*NM-->PF
600	C.vicina England, RT 21 °C				850	C.vicina England, RT 21 °C				1200	C.vicina England, RT 21 °C				1450	C.vicina England, RT 21 °C				1800	C.vicina England, RT 21 °C				2050	C.vicina England, RT 21 °C				2400	C.vicina England, RT 21 °C
	Replicate	Date	Larval length (cm)			Replicate	Date	Larval length (cm)			Replicate	Date	Larval length (cm)			Replicate	Date	Larval length (cm)			Replicate	Date	Larval length (cm)			Replicate	Date	Larval length (cm)			Replicate	Date	Larval length (cm)
	3	7.5.16	0.67			3	8.5.16	0.77			3	8.5.16	1.48			3	9.5.16	1.63			3	9.5.16	1.8			3	10.5.16	1.8			3	11.5.16	*NM-->PF
			0.68					0.8					1.58					1.67					1.79					1.86					*NM-->PF
			0.64					0.93					1.06					1.67					1.58					1.68					*NM-->PF
			0.55					0.95					1.49					1.56					1.68					1.79					*NM-->PF
			0.77					0.88					1.32					1.74					1.5					1.74					*NM-->PF
			0.62					0.94					1.73					1.68					1.8					1.82					*NM-->PF
			0.72					0.92					1.82					1.73					1.78					1.76					*NM-->PF
			0.79					0.98					1.88					1.88					1.75					1.73					*NM-->PF
			0.7	0.0753923				1.24	0.166676				1.73	0.235932				1.69	0.079555				1.8	0.100225				1.75	0.051225				*NM-->PF
			0.8	0.694				1.32	0.973				1.67	1.576				1.74	1.699				1.77	1.725				1.83	1.776				*NM-->PF
																																NM = not measure
																																PF = post-feeding

## Sheet: Ger larval length
600	C.vicina Germany, 25 °C				850	C.vicina Germany, 25 °C				1200	C.vicina Germany, 25 °C				1450	C.vicina Germany, 25 °C				1800	C.vicina Germany, 25 °C				2050	C.vicina Germany, 25 °C				2400	C.vicina Germany, 25 °C
	Replicate	Date	Larval length (cm)			Replicate	Date	Larval length (cm)			Replicate	Date	Larval length (cm)			Replicate	Date	Larval length (cm)			Replicate	Date	Larval length (cm)			Replicate	Date	Larval length (cm)			Replicate	Date	Larval length (cm)
	1	19.3.16	0.63			1	19.3.16	0.99			1	20.3.16	1.36			1	20.3.16	1.68			1	21.3.16	1.81			1	21.3.16	1.56			1	22.3.16	*NM-->Low number
			0.66					0.79					1.4					1.69					1.78					1.59					*NM-->Low number
			0.68					0.84					1.21					1.54					1.2					1.58					*NM-->Low number
			0.72					0.76					1.37					1.59					1.48					1.72					*NM-->Low number
			0.6					0.92					1.39					1.56					1.49					1.76					*NM-->Low number
			0.67					0.96					1.38					1.67					1.65					1.85					*NM-->Low number
			0.68					0.8					1.54					1.36					1.59					1.88					*NM-->Low number
			0.71					0.74					1.46					1.48					1.72					1.77					*NM-->Low number
			0.72	0.0387298				0.78	0.0822435				1.56	0.0983667				1.28	0.130399				1.46	0.173853				1.63	0.112432				*NM-->Low number
			0.63	0.67				0.86	0.844				1.51	1.418				1.61	1.546				1.67	1.585				1.59	1.693				*NM-->Low number
	2	11.4.16	0.63			2	11.4.16	1.04			2	12.4.16	1.22			2	12.4.16	1.38			2	13.4.16	1.79			2	13.4.16	1.78			2	14.4.16	*NM-->PF
			0.72					0.91					1.46					1.59					1.69					1.73					*NM-->PF
			0.53					0.84					1.47					1.63					1.39					1.5					*NM-->PF
			0.57					0.9					1.28					1.44					1.47					1.59					*NM-->PF
			0.76					0.83					1.34					1.72					1.63					1.75					*NM-->PF
			0.74					0.82					1.49					1.62					1.63					1.72					*NM-->PF
			0.75					1.13					1.45					1.55					1.7					1.68					*NM-->PF
			0.66					1.06					1.43					1.58					1.77					1.67					*NM-->PF
			0.7					0.82					1.31					1.61					1.67					1.56					*NM-->PF
			0.64					1.06					1.27					1.67					1.59					1.74					*NM-->PF
	3	11.4.16	0.75			3	11.4.16	0.75			3	12.4.16	1.57			3	12.4.16	1.26			3	13.4.16	1.85			3	13.4.16	1.38			3	14.4.16	1.8
			0.72					0.93					1.54					1.34					1.73					1.5					1.77
			0.61					1.1					1.48					1.77					1.84					1.56					1.76
			0.64					0.94					1.38					1.48					1.74					1.8					1.64
			0.75					0.78					1.3					1.5					1.45					1.5					*NM-->PF
			0.68					0.73					1.39					1.48					1.48					1.66					*NM-->PF
			0.56					0.78					1.27					1.4					1.62					1.79					*NM-->PF
			0.73					0.84					1.28					1.57					1.68					1.8					*NM-->PF
			0.73					1.08					1.29					1.42					1.67					1.68					*NM-->PF
			0.74					1.1					1.36					1.44					1.68					1.71					*NM-->PF
		Mean	0.677					0.896					1.392					1.53033					1.63067					1.66767
		SD	0.0612726					0.121425					0.100645					0.129241					0.145921					0.117266
600	C.vicina Germany, 16 °C				850	C.vicina Germany, 16 °C				1200	C.vicina Germany, 16 °C				1450	C.vicina Germany, 16 °C				1800	C.vicina Germany, 16 °C				2050	C.vicina Germany, 16 °C				2400	C.vicina Germany, 16 °C
	Replicate	Date	Larval length (cm)			Replicate	Date	Larval length (cm)			Replicate	Date	Larval length (cm)			Replicate	Date	Larval length (cm)			Replicate	Date	Larval length (cm)			Replicate	Date	Larval length (cm)			Replicate	Date	Larval length (cm)
	1	3.4.16	0.43			1	4.4.16	0.64			1	5.4.16	0.76			1	6.4.16	1.19			1	7.4.16	1.47			1	8.4.16	1.77			1	9.4.16	1.73
			0.62					0.78					0.8					1.26					1.54					1.8					1.75
			0.45					0.76					0.89					1.14					1.52					1.86					1.8
			0.43					0.61					0.73					1.35					1.59					1.82					1.81
			0.46					0.62					0.74					1.16					1.7					1.55					1.75
			0.51					0.61					0.69					1.04					1.48					1.78					1.72
			0.57					0.6					0.81					1.02					1.53					1.84					1.43
			0.58					0.7					0.88					1.35					1.58					1.78					1.84
			0.54	0.0660606				0.68	0.0614898				0.92	0.121594				1.18	0.106494				1.69	0.0746994				1.83	0.0865794				1.76	0.108056
			0.57	0.516				0.63	0.663				1.13	0.835				1.24	1.193				1.6	1.57				1.69	1.772				1.69	1.728
	2		0.51			2		0.82			2		0.97			2		1.39			2		1.29			2		1.8			2		1.75
			0.45					0.71					1.07					1.2					1.64					1.81					1.78
			0.59					0.78					1.22					1.14					1.26					1.77					1.63
			0.53					0.68					1.1					1.33					1.69					1.8					1.78
			0.6					0.72					0.83					1.36					1.54					1.82					*NM-->PF
			0.46					0.73					0.75					1.47					1.55					1.84					*NM-->PF
			0.49					0.68					0.75					1.4					1.52					1.88					*NM-->PF
			0.5					0.72					0.75					1.37					1.63					1.73					*NM-->PF
			0.53					0.75					0.88					1.38					1.68					1.83					1.78
			0.62					0.72					0.89					1.44					1.57					1.82					1.77
	3	5.5.16	0.58			3	5.5.16	0.63			3	6.5.16	1.05			3	7.5.16	1.28			3	8.5.16	1.38			3	8.5.16	1.58			3	9.5.16	1.83
			0.47					0.78					0.78					1.3					1.6					1.69					1.82
			0.59					0.63					0.78					1.15					1.62					1.74					1.88
			0.6					0.7					0.92					1.39					1.64					1.66					1.84
			0.55					0.7					0.89					1.18					1.64					1.67					1.8
			0.51					0.76					0.9					0.83					1.68					1.69					1.83
			0.55					0.6					0.95					1.14					1.51					1.79					1.66
			0.5					0.68					0.84					1.28					1.59					1.6					1.77
			0.56					0.77					1.04					1.43					1.67					1.65					1.92
			0.53					0.74					1.03					1.2					1.65					1.64					1.85
		Mean	0.529333					0.697667					0.891333					1.253					1.56833					1.751					1.76808
		SD	0.0559722					0.0617351					0.133085					0.141283					0.108138					0.0870383					0.0625999
600	C.vicina Germany, RT 17 °C				850	C.vicina Germany, RT 17 °C				1200	C.vicina Germany, RT 17 °C				1450	C.vicina Germany, RT 17 °C				1800	C.vicina Germany, RT 17 °C				2050	C.vicina Germany, RT 17 °C				2400	C.vicina Germany, RT 17 °C
	Replicate	Date	Larval length (cm)			Replicate	Date	Larval length (cm)			Replicate	Date	Larval length (cm)			Replicate	Date	Larval length (cm)			Replicate	Date	Larval length (cm)			Replicate	Date	Larval length (cm)			Replicate	Date	Larval length (cm)
	1	19.3.16	0.56			1	20.3.16	0.78			1	21.3.16	1.04			1	22.3.16	1.68			1	23.3.16	1.7			1	24.3.16	1.68			1	25.3.16	*NM-->PF
			0.61					0.74					1.06					1.69					1.64					1.64					*NM-->PF
			0.58					0.66					1.27					1.54					1.8					1.67					*NM-->PF
			0.44					0.76					1.34					1.81					1.79					1.56					*NM-->PF
			0.56					0.84					1.38					1.76					1.83					1.77					*NM-->PF
			0.57					0.87					1.35					1.79					1.68					1.53					*NM-->PF
			0.53					0.78					1.28					1.78					1.77					1.59					*NM-->PF
			0.57					0.82					1.18					1.72					1.65					1.67					*NM-->PF
			0.58	0.0434051				0.77	0.0549181				1.16	0.116876				1.71	0.0731847				1.78	0.0632139				1.77	0.0783837				*NM-->PF
			0.54	0.554				0.8	0.782				1.34	1.24				1.74	1.722				1.74	1.738				1.58	1.646				*NM-->PF
600	C.vicina Germany, RT 21 °C				850	C.vicina Germany, RT 21 °C				1200	C.vicina Germany, RT 21 °C				1450	C.vicina Germany, RT 21 °C				1800	C.vicina Germany, RT 21 °C				2050	C.vicina Germany, RT 21 °C				2400	C.vicina Germany, RT 21 °C
	Replicate	Date	Larval length (cm)			Replicate	Date	Larval length (cm)			Replicate	Date	Larval length (cm)			Replicate	Date	Larval length (cm)			Replicate	Date	Larval length (cm)			Replicate	Date	Larval length (cm)			Replicate	Date	Larval length (cm)
	2	7.5.16	0.55			2	8.5.16	0.94			2	8.5.16	1.51			2	9.5.16	1.68			2	9.5.16	1.68			2	10.5.16	1.5			2	11.5.16	*NM-->PF
			0.59					1.19					1.59					1.2					1.55					1.42					*NM-->PF
			0.58					0.79					1.27					1.67					1.75					1.65					*NM-->PF
			0.53					0.76					1.45					1.64					1.69					1.48					*NM-->PF
			0.63					1.03					1.53					1.74					1.76					1.74					*NM-->PF
			0.7					0.84					1.56					1.79					1.74					1.83					*NM-->PF
			0.75					0.85					1.6					1.64					1.67					1.76					*NM-->PF
			0.59					0.98					1.63					1.69					1.65					1.8					*NM-->PF
			0.62	0.0747596				0.99	0.128234				1.59	0.099945				1.83	0.165532				1.65	0.0591946				1.75	0.137917				*NM-->PF
			0.75	0.629				1.07	0.944				1.58	1.531				1.75	1.663				1.72	1.686				1.7	1.663				*NM-->PF
600	C.vicina Germany, RT 21 °C				850	C.vicina Germany, RT 21 °C				1200	C.vicina Germany, RT 21 °C				1450	C.vicina Germany, RT 21 °C				1800	C.vicina Germany, RT 21 °C				2050	C.vicina Germany, RT 21 °C				2400	C.vicina Germany, RT 21 °C
	Replicate	Date	Larval length (cm)			Replicate	Date	Larval length (cm)			Replicate	Date	Larval length (cm)			Replicate	Date	Larval length (cm)			Replicate	Date	Larval length (cm)			Replicate	Date	Larval length (cm)			Replicate	Date	Larval length (cm)
	3	7.5.16	0.58			3	8.5.16	1.15			3	8.5.16	1.54			3	9.5.16	1.75			3	9.5.16	1.48			3	10.5.16	1.7			3	11.5.16	*NM-->PF
			0.76					0.88					1.5					1.68					1.45					1.78					*NM-->PF
			0.67					0.99					1.61					1.64					1.63					1.5					*NM-->PF
			0.65					1.13					1.57					1.73					1.76					1.75					*NM-->PF
			0.64					1.23					1.68					1.8					1.72					1.85					*NM-->PF
			0.77					0.82					1.67					1.69					1.8					1.74					*NM-->PF
			0.68					1.18					1.72					1.7					1.78					1.69					*NM-->PF
			0.69					1.28					1.69					1.71					1.68					1.85					*NM-->PF
			0.75	0.0575847				1.17	0.161914				1.7	0.0705691				1.84	0.0559375				1.8	0.12311				1.88	0.108444				*NM-->PF
			0.73	0.692				1.35	1.118				1.62	1.63				1.75	1.729				1.78	1.688				1.86	1.76				*NM-->PF
																																NM = not measure
																																PF = post-feeding

## Sheet: Eng. duration
Day	Stage				C.vicina England, 25 °C							Day	Stage				C.vicina England, 16 °C					Day	Stage				C.vicina England, RT
	1	2	3		Stage(s)	1	2	3					1	2	3		Stage(s)	1	2	3			1 (18 °C)	2 (21 °C)	3(21 °C)		Stage(s)	1	2	3
0	E	E	E		Larvae	4 to 5	5 to 8	3 to 5				0	E	E	E		Larvae	7 to 8	6 to 10	5 to 8		0	E	E	E		Larvae	6 to 9	5 to 7	5 to 8
1	L	L	L		PF	2 to 3	2 to 6	2 to 4				1	L	L	L		PF	*3 to 19	3 to 5	4 to 6		1	L	L	L		PF	2 to 8	2 to 3	3 to 5
2	L	L	L		Pupae	7 to 9	10 to 13	10 to 12				2	L	L	L		Pupae	18 to 21	18 to 21	19 to 22		2	L	L	L		Pupae	13 to 17	10 to 13	10 to 12
3	L	L	L									3	L	L	L							3	L	L	L
4	L	L	L/PF		Adult	D14-D16	D17-D20	D16-D18				4	L	L	L		Adult	D29-D32	D28-D31	D29-D32		4	L	L	L		Adult	D22-D26	D18-D21	D19-D21
5	L/PF	L/PF	L/PF									5	L	L	L							5	L	L	L
6	PF	L/PF	PF/Pu		Note: Day0 = Oviposited, Day1 = Seperated, Day2 = 1st measuring							6	L	L	L/PF							6	L	L/PF	L/PF
7	PF/Pu	L/PF/Pu	PF/Pu									7	L	L/PF	L/PF		* only one PF					7	L/PF	L/PF	L/PF
8	Pu	L/PF/Pu	Pu		เราจะ cut off PF at 25%							8	L/PF	L/PF	L/PF							8	L/PF	PF/Pu	L/PF
9	Pu	PF/Pu	Pu									9	PF	L/PF	PF							9	L/PF/Pu	Pu	PF/Pu
10	Pu	PF/Pu	Pu									10	PF	L/PF/Pu	PF/Pu							10	PF/Pu	Pu	PF/Pu
11	Pu	Pu	Pu				Larvae= feeding stage					11	PF/Pu	PF/Pu	PF/Pu							11	PF/Pu	Pu	Pu
12	Pu	Pu	Pu									12	*PF/Pu	Pu	Pu							12	PF/Pu	Pu	Pu
13	Pu	Pu	Pu									13	*PF/Pu	Pu	Pu							13	PF/Pu	Pu	Pu
14	Pu/A	Pu	Pu									14	*PF/Pu	Pu	Pu							14	PF/Pu	Pu	Pu
15	Pu/A	Pu	Pu									15	*PF/Pu	Pu	Pu							15	Pu	Pu	Pu
16	A	Pu	Pu/A									16	*PF/Pu	Pu	Pu							16	Pu	Pu	Pu
17	A	Pu/A	Pu/A									17	*PF/Pu	Pu	Pu							17	Pu	Pu	Pu
18	A	Pu/A	A									18	*PF/Pu	Pu	Pu							18	Pu	Pu/A	Pu
19	A	Pu/A	A									19	*PF/Pu	Pu	Pu							19	Pu	Pu/A	Pu/A
20		A	A									20	*PF/Pu	Pu	Pu							20	Pu	Pu/A	Pu/A
21		A										21	*PF/Pu	Pu	Pu							21	Pu	A	A
22		A										22	*PF/Pu	Pu	Pu							22	Pu/A	A
												23	*PF/Pu	Pu	Pu							23	Pu/A
												24	*PF/Pu	Pu	Pu							24	Pu/A
												25	*PF/Pu	Pu	Pu							25	Pu/A
												26	*PF/Pu	Pu	Pu							26	A
												27	Pu	Pu	Pu							27
												28	Pu	Pu/A	Pu							28
												29	Pu/A	Pu/A	Pu/A							29
												30	Pu/A	Pu/A	Pu/A							30
												31	Pu/A	A	Pu/A
												32	A		A
												33	A
												34
												35
												36
												37
												38
												39
												40

## Sheet: Ger. duration
Day	Stage				C.vicina Germany, 25 °C							Day	Stage				C.vicina Germany, 16 °C					Day	Stage				C.vicina Germany, RT
	1	2	3		Stage(s)	1	2	3					1	2	3		Stage(s)	1	2	3			1 (17 °C)	2 (21 °C)	3(21 °C)		Stage(s)	1	2	3
0	E	E	E		Larvae	3 to 8	3 to 4	3 to 5				0	E	E	E		Larvae	7 to 8	5 to 7	6 to 7		0	E	E	E		Larvae	6 to 7	5 to 7	5 to 7
1	L	L	L		PF	3 to 8	3 to 4	3 to 4				1	L	L	L		PF	3 to 6	3 to 7	3 to 5		1	L	L	L		PF	1 to 3	3 to 4	3 to 4
2	L	L	L		Pupae	9 to 13	9 to 11	9 to 11				2	L	L	L		Pupae	18 to 22	17 to 20	18 to 21		2	L	L	L		Pupae	13 to 17	10 to 13	10 to 14
3	L	L	L									3	L	L	L							3	L	L	L
4	L/PF	L/PF	L/PF		Adult	D16-D20	D16-D18	D16-D18				4	L	L	L		Adult	D29-D33	D26-D29	D28-D31		4	L	L	L		Adult	D21-D25	D19-D22	D19-D23
5	L/PF	PF	L/PF									5	L	L	L							5	L	L	L
6	L/PF	PF	PF		Note: Day0 = Oviposited, Day1 = Seperated, Day2 = 1st measuring							6	L	L/PF	L							6	L	L/PF	L/PF
7	L/PF/Pu	PF/Pu	PF/Pu									7	L	L/PF	L/PF							7	L/PF	L/PF	L/PF
8	L/PF/Pu	Pu	Pu									8	L/PF	PF	PF							8	PF/Pu	PF	PF
9	PF/Pu	Pu	Pu									9	PF	PF/Pu	PF							9	PF/Pu	PF/Pu	PF/Pu
10	PF/Pu	Pu	Pu									10	PF	PF/Pu	PF/Pu							10	Pu	Pu	Pu
11	PF/Pu	Pu	Pu									11	PF/Pu	PF/Pu	PF/Pu							11	Pu	Pu	Pu
12	Pu	Pu	Pu									12	PF/Pu	PF/Pu	Pu							12	Pu	Pu	Pu
13	Pu	Pu	Pu									13	PF/Pu	Pu	Pu							13	Pu	Pu	Pu
14	Pu	Pu	Pu									14	Pu	Pu	Pu							14	Pu	Pu	Pu
15	Pu	Pu	Pu									15	Pu	Pu	Pu							15	Pu	Pu	Pu
16	Pu/A	Pu/A	Pu/A									16	Pu	Pu	Pu							16	Pu	Pu	Pu
17	Pu/A	Pu/A	Pu/A									17	Pu	Pu	Pu							17	Pu	Pu	Pu
18	Pu/A	A	A									18	Pu	Pu	Pu							18	Pu	Pu	Pu
19	Pu/A	A	A									19	Pu	Pu	Pu							19	Pu	Pu/A	Pu/A
20	A	A	A									20	Pu	Pu	Pu							20	Pu	Pu/A	Pu/A
21												21	Pu	Pu	Pu							21	Pu/A	Pu/A	Pu/A
22												22	Pu	Pu	Pu							22	Pu/A	A	Pu/A
23												23	Pu	Pu	Pu							23	Pu/A	A	A
24												24	Pu	Pu	Pu							24	Pu/A
25												25	Pu	Pu	Pu							25	A
26												26	Pu	Pu/A	Pu							26
												27	Pu	Pu/A	Pu							27
												28	Pu	Pu/A	Pu/A							28
												29	Pu/A	A	Pu/A							29
												30	Pu/A	A	Pu/A							30
												31	Pu/A		A
												32	Pu/A
												33	A
												34
												35
												36
												37
												38
												39
												40

## Sheet: Minimum of time
Germany												England
Temperature	Stages	Day	Numbers of each stage									Temperature	Stages	Day	Numbers of each stage
			1		2		3			Minimum					1		2		3			Minimum
25 °C	PF	1	1	4	28		9	38				25 °C	PF	1	2	5	9	5	3	4
		2	6	5	6		16	28		4				2	22	6	7	6	16	5		6
		3	7	6	4		11	22						3	3	7	2	7	14	6
		4	3	7	3			6						4			1	8
	Pu	1	5	7	36		27	68					Pu	1	1	7	3	7	1	6
		2	11	8	3		7	21		7				2	22	8	6	8	24	7		7
		3	7	9			2	9						3	4	9	2	9
		4	1	10				1						4	1	10	6	10
														5			1	11
	Adult	1	1	16	13		10	24					Adult	1	1	14	2	17	1	16
		2	10	17	17		11	38		17				2	9	15	5	18	19	17		17
		3	3	18	4		6	13						3	8	16	1	19	2	18
		4	2	19				2						4	4	17	1	20
16 °C	PF	1	11	8	4	6	16	7				16 °C	PF	1	15	8	6	7	6	6
		2	14	9	30	7	20	8		7				2	9	9	7	8	21	7		7
		3	1	10	5	8		9						3	3	10	1	9
		4												4
	Pu	1	13	11	1	9	10	10					Pu	1	24	11	7	10	3	10
		2	9	12	23	10	27	11		11				2	5	12	8	11	22	11		11
		3	2	13	14	11	1	12						3	1 (ignore)	13	2	12	2	12
		4			1									4		14		13		13
	Adult	1	1	29	6	26	3	28					Adult	1	1	29	4	28	12	29
		2	11	30	18	27	4	29		30				2	18	30	8	29	12	30		30
		3	10	31	10	28	20	30						3	9	31	4	30	2	31
		4	1	32	1	29	11	31						4	2	32	1	31	1	32
RT	PF	1	15	7	4	6	9	6				RT	PF	1	6	7	1	6	2	6
		2	15	8	32	7	23	7		7				2	9	8	20	7	16	7		8
		3	4	9	8	8	2	8						3	5	9	22	8	15	8
		4	2			9		9						4	3	10			1	9
	Pu	1	1	8	31	9	37	9					Pu	1	7	7	27	8	12	9
		2	17	9	10	10	4	10		9				2	8	8	22	9	19	10		9
		3	16	10										3	2	9	1	10	2	11
		4	3	11										4	1	10
														5	1	11
														6	1	12
	Adult	1	11	21	4	19	8	19					Adult	1	4	22	5	18	4	19
		2	15	22	29	20	22	20		20				2	3	23	32	19	16	20		19
		3	7	23	3	21	3	21						3	8	24	7	20	13	21
		4	3	24	1	22	0	22						4	0	25	1	21
		5	1	25	1	23	1	23						5	1	26	1	22

## Sheet: Mini Ger
Germany						16 degree						RT degree
25 degree						Stage	Day	N	Day*N	(D*N)/total		Stage	Day	N	Day*N	(D*N)/total
Stage	Day	N	Day*N	(D*N)/total		PF	6	4	24			PF	6	28	168
PF	4	38	152				7	46	322				7	70	490
	5	28	140				8	36	288				8	14	112
	6	22	132				9	14	126				9	2	18
	7	6	42				10	1	10				total	114	788	6.91228
	total	94	466	4.95745			total	101	770	7.62376
							9	1	9			Pu	8	1	8
Pu	7	68	476			Pu	10	33	330				9	85	765
	8	21	168				11	54	594				10	30	300
	9	9	81				12	11	132				11	3	33
	10	1	10				13	2	26				total	119	1106	9.29412
	total	99	735	7.42424			total	101	1091	10.802
												Adult	19	12	228
Adult	16	24	384			Adult	26	6	156				20	51	1020
	17	38	646				27	18	486				21	17	357
	18	13	234				28	13	364				22	16	352
	19	2	38				29	6	174				23	9	207
	total	77	1302	16.9091			30	31	930				24	3	72
							31	21	651				25	1	25
							32	1	32				total	109	2261	20.7431
							total	96	2793	29.0938

## Sheet: Mini Eng
England						16 degree						RT degree
25 degree						Stage	Day	N	Day*N	(D*N)/total		Stage	Day	N	Day*N	(D*N)/total
Stage	Day	N	Day*N	(D*N)/total		PF	6	6	36			PF	6	3	18
PF	4	3	12				7	27	189				7	42	294
	5	27	135				8	22	176				8	46	368
	6	43	258				9	10	90				9	6	54
	7	5	35				10	3	30				10	3	30
	8	1	8				total	68	521	7.66176			total	100	764	7.64
	total	79	448	5.67089
						Pu	10	10	100			Pu	7	7	49
Pu	6	1	6				11	54	594				8	35	280
	7	28	196				12	9	108				9	36	324
	8	28	224				total	73	802	10.9863			10	21	210
	9	6	54										11	3	33
	10	7	70			Adult	28	4	112				12	1	12
	11	1	11				29	21	609				total	103	908	8.81553
	total	71	561	7.90141			30	34	1020
							31	12	372			Adult	18	5	90
Adult	14	1	14				32	3	96				19	36	684
	15	9	135				total	74	2209	29.8514			20	23	460
	16	9	144										21	14	294
	17	25	425										22	5	110
	18	7	126										23	3	69
	19	1	19										24	8	192
	20	1	20										25	0	0
	total	53	883	16.6604									26	1	26
													total	95	1925	20.2632
