# Supplementary material for: A molecular, morphological, and physiological comparison of English and German populations of Calliphora vicina (Diptera: Calliphoridae)
Source: PLoS One. 2018 Dec 3;13(12):e0207188. doi: 10.1371/journal.pone.0207188 (PMC6277095; doi:10.1371/journal.pone.0207188)
Supplement: S2 Data — (TPS) [file pone.0207188.s002.tps]

LM=19
325.00000 671.00000
568.00000 686.00000
728.00000 681.00000
1095.00000 629.00000
1195.00000 553.00000
1210.00000 531.00000
1027.00000 424.00000
950.00000 462.00000
785.00000 359.00000
823.00000 289.00000
678.00000 540.00000
658.00000 572.00000
462.00000 600.00000
437.00000 564.00000
440.00000 529.00000
421.00000 532.00000
395.00000 493.00000
350.00000 610.00000
352.00000 674.00000
IMAGE=CV 1-1 F.jpg
ID=CVG1- 1F 
LM=19
372.00000 680.00000
594.00000 688.00000
741.00000 685.00000
1062.00000 643.00000
1149.00000 576.00000
1163.00000 556.00000
989.00000 459.00000
918.00000 491.00000
769.00000 411.00000
804.00000 351.00000
691.00000 560.00000
671.00000 591.00000
493.00000 617.00000
472.00000 583.00000
474.00000 554.00000
456.00000 555.00000
433.00000 515.00000
393.00000 625.00000
398.00000 683.00000
IMAGE=CV 1-1 M.jpg
ID=CVG1- 1M 
LM=19
276.00000 658.00000
529.00000 673.00000
704.00000 672.00000
1080.00000 624.00000
1181.00000 549.00000
1194.00000 530.00000
999.00000 423.00000
909.00000 464.00000
757.00000 356.00000
805.00000 282.00000
648.00000 535.00000
630.00000 565.00000
408.00000 591.00000
386.00000 556.00000
389.00000 525.00000
370.00000 522.00000
349.00000 487.00000
301.00000 597.00000
307.00000 662.00000
IMAGE=CV 1-2 F.jpg
ID=CVG1- 2F 
LM=19
376.00000 652.00000
579.00000 670.00000
719.00000 668.00000
1025.00000 629.00000
1116.00000 566.00000
1133.00000 544.00000
954.00000 459.00000
884.00000 491.00000
742.00000 409.00000
784.00000 347.00000
679.00000 552.00000
659.00000 576.00000
490.00000 595.00000
469.00000 565.00000
469.00000 539.00000
455.00000 539.00000
433.00000 508.00000
407.00000 599.00000
401.00000 657.00000
IMAGE=CV 1-2 M.jpg
ID=CVG1- 2M 
LM=19
312.00000 661.00000
543.00000 676.00000
694.00000 673.00000
1054.00000 618.00000
1150.00000 551.00000
1165.00000 531.00000
986.00000 425.00000
912.00000 455.00000
752.00000 360.00000
795.00000 294.00000
652.00000 534.00000
635.00000 567.00000
433.00000 597.00000
412.00000 561.00000
413.00000 529.00000
396.00000 531.00000
369.00000 495.00000
344.00000 600.00000
340.00000 665.00000
IMAGE=CV 1-3 F.jpg
ID=CVG1- 3F 
LM=19
371.00000 676.00000
602.00000 694.00000
747.00000 690.00000
1063.00000 651.00000
1163.00000 590.00000
1179.00000 570.00000
992.00000 455.00000
919.00000 491.00000
751.00000 401.00000
797.00000 338.00000
695.00000 555.00000
678.00000 587.00000
489.00000 612.00000
474.00000 575.00000
475.00000 540.00000
456.00000 537.00000
431.00000 502.00000
394.00000 618.00000
398.00000 678.00000
IMAGE=CV 1-3 M.jpg
ID=CVG1- 3M 
LM=19
366.00000 688.00000
579.00000 702.00000
716.00000 698.00000
1024.00000 652.00000
1115.00000 576.00000
1123.00000 560.00000
968.00000 498.00000
923.00000 517.00000
774.00000 435.00000
816.00000 373.00000
694.00000 586.00000
677.00000 609.00000
486.00000 630.00000
466.00000 600.00000
469.00000 572.00000
450.00000 568.00000
427.00000 540.00000
388.00000 636.00000
390.00000 692.00000
IMAGE=CV 1-4 F.jpg
ID=CVG1- 4F 
LM=19
395.00000 669.00000
611.00000 684.00000
745.00000 676.00000
1056.00000 635.00000
1132.00000 576.00000
1148.00000 557.00000
984.00000 456.00000
913.00000 491.00000
763.00000 411.00000
797.00000 353.00000
719.00000 554.00000
697.00000 587.00000
514.00000 609.00000
492.00000 577.00000
491.00000 545.00000
476.00000 547.00000
453.00000 514.00000
419.00000 616.00000
426.00000 673.00000
IMAGE=CV 1-4 M.jpg
ID=CVG1- 4M 
LM=19
329.00000 655.00000
549.00000 677.00000
693.00000 678.00000
1019.00000 628.00000
1105.00000 561.00000
1118.00000 542.00000
960.00000 463.00000
890.00000 491.00000
739.00000 396.00000
784.00000 332.00000
654.00000 551.00000
634.00000 575.00000
446.00000 599.00000
430.00000 563.00000
431.00000 539.00000
417.00000 539.00000
397.00000 506.00000
351.00000 603.00000
353.00000 659.00000
IMAGE=CV 1-5 F.jpg
ID=CVG1- 5F 
LM=19
344.00000 663.00000
567.00000 679.00000
726.00000 680.00000
1051.00000 636.00000
1137.00000 575.00000
1154.00000 555.00000
985.00000 450.00000
907.00000 483.00000
762.00000 390.00000
805.00000 325.00000
684.00000 549.00000
660.00000 580.00000
460.00000 605.00000
439.00000 570.00000
441.00000 539.00000
425.00000 538.00000
402.00000 506.00000
371.00000 608.00000
370.00000 667.00000
IMAGE=CV 1-6 F.jpg
ID=CVG1- 6F 
LM=19
317.00000 693.00000
577.00000 692.00000
751.00000 691.00000
1129.00000 623.00000
1230.00000 536.00000
1244.00000 510.00000
1030.00000 424.00000
946.00000 461.00000
786.00000 368.00000
833.00000 288.00000
689.00000 555.00000
668.00000 587.00000
458.00000 613.00000
430.00000 579.00000
435.00000 544.00000
416.00000 546.00000
391.00000 504.00000
344.00000 630.00000
353.00000 694.00000
IMAGE=CV 2-1 F.jpg
ID=CVG1- 1F 
LM=19
343.00000 666.00000
551.00000 682.00000
687.00000 683.00000
999.00000 634.00000
1075.00000 575.00000
1090.00000 553.00000
920.00000 465.00000
852.00000 498.00000
704.00000 420.00000
742.00000 359.00000
653.00000 563.00000
635.00000 591.00000
455.00000 611.00000
435.00000 578.00000
437.00000 548.00000
420.00000 547.00000
399.00000 515.00000
365.00000 616.00000
368.00000 668.00000
IMAGE=CV 2-1 M.jpg
ID=CVG1- 1M 
LM=19
354.00000 674.00000
576.00000 692.00000
726.00000 694.00000
1053.00000 650.00000
1140.00000 591.00000
1158.00000 568.00000
994.00000 463.00000
921.00000 495.00000
791.00000 403.00000
833.00000 347.00000
685.00000 566.00000
667.00000 595.00000
473.00000 616.00000
455.00000 580.00000
456.00000 554.00000
439.00000 553.00000
417.00000 519.00000
379.00000 620.00000
383.00000 679.00000
IMAGE=CV 2-10 F.jpg
ID=CVG1-10F 
LM=19
355.00000 691.00000
569.00000 702.00000
709.00000 700.00000
1042.00000 661.00000
1138.00000 596.00000
1152.00000 581.00000
985.00000 477.00000
902.00000 509.00000
770.00000 413.00000
818.00000 353.00000
666.00000 577.00000
653.00000 605.00000
465.00000 626.00000
453.00000 593.00000
456.00000 561.00000
437.00000 562.00000
413.00000 528.00000
376.00000 634.00000
381.00000 694.00000
IMAGE=CV 2-2 F.jpg
ID=CVG1- 2F 
LM=19
351.00000 668.00000
567.00000 685.00000
707.00000 682.00000
1018.00000 640.00000
1102.00000 583.00000
1118.00000 561.00000
954.00000 470.00000
889.00000 502.00000
722.00000 411.00000
760.00000 350.00000
666.00000 559.00000
648.00000 590.00000
467.00000 609.00000
448.00000 577.00000
447.00000 545.00000
432.00000 545.00000
407.00000 509.00000
372.00000 614.00000
376.00000 673.00000
IMAGE=CV 2-2 M.jpg
ID=CVG1- 2M 
LM=19
285.00000 682.00000
517.00000 706.00000
680.00000 703.00000
1055.00000 670.00000
1161.00000 606.00000
1182.00000 585.00000
997.00000 465.00000
913.00000 496.00000
745.00000 395.00000
791.00000 320.00000
647.00000 563.00000
620.00000 596.00000
423.00000 616.00000
401.00000 575.00000
405.00000 543.00000
385.00000 541.00000
366.00000 500.00000
310.00000 621.00000
316.00000 688.00000
IMAGE=CV 2-3 F.jpg
ID=CVG1- 3F 
LM=19
343.00000 672.00000
566.00000 689.00000
714.00000 687.00000
1033.00000 644.00000
1115.00000 588.00000
1130.00000 570.00000
952.00000 474.00000
881.00000 504.00000
743.00000 421.00000
784.00000 362.00000
674.00000 568.00000
653.00000 598.00000
464.00000 617.00000
444.00000 582.00000
447.00000 550.00000
432.00000 552.00000
409.00000 516.00000
365.00000 621.00000
370.00000 676.00000
IMAGE=CV 2-3 M.jpg
ID=CVG1- 3M 
LM=19
311.00000 671.00000
560.00000 687.00000
714.00000 687.00000
1083.00000 629.00000
1185.00000 563.00000
1204.00000 543.00000
1027.00000 438.00000
929.00000 471.00000
773.00000 364.00000
818.00000 293.00000
670.00000 541.00000
650.00000 574.00000
440.00000 601.00000
421.00000 562.00000
424.00000 531.00000
405.00000 532.00000
378.00000 492.00000
336.00000 612.00000
336.00000 676.00000
IMAGE=CV 2-4 F.jpg
ID=CVG1- 4F 
LM=19
365.00000 667.00000
565.00000 678.00000
701.00000 677.00000
996.00000 640.00000
1071.00000 588.00000
1087.00000 573.00000
925.00000 470.00000
861.00000 504.00000
715.00000 424.00000
748.00000 367.00000
673.00000 562.00000
652.00000 590.00000
471.00000 611.00000
454.00000 582.00000
453.00000 555.00000
437.00000 554.00000
418.00000 524.00000
385.00000 621.00000
387.00000 670.00000
IMAGE=CV 2-4 M.jpg
ID=CVG1- 4M 
LM=19
357.00000 648.00000
576.00000 656.00000
725.00000 657.00000
1044.00000 609.00000
1132.00000 540.00000
1146.00000 520.00000
981.00000 430.00000
918.00000 459.00000
781.00000 380.00000
817.00000 318.00000
676.00000 539.00000
653.00000 567.00000
471.00000 589.00000
450.00000 561.00000
457.00000 532.00000
440.00000 532.00000
420.00000 500.00000
376.00000 595.00000
384.00000 650.00000
IMAGE=CV 2-5 F.jpg
ID=CVG1- 5F 
LM=19
429.00000 675.00000
620.00000 689.00000
740.00000 685.00000
1015.00000 647.00000
1089.00000 590.00000
1099.00000 574.00000
952.00000 501.00000
881.00000 531.00000
759.00000 457.00000
789.00000 400.00000
708.00000 584.00000
687.00000 606.00000
529.00000 623.00000
511.00000 596.00000
512.00000 570.00000
496.00000 570.00000
477.00000 540.00000
446.00000 630.00000
453.00000 679.00000
IMAGE=CV 2-5 M.jpg
ID=CVG1- 5M 
LM=19
317.00000 672.00000
542.00000 688.00000
695.00000 685.00000
1049.00000 638.00000
1146.00000 569.00000
1161.00000 549.00000
979.00000 445.00000
904.00000 478.00000
756.00000 383.00000
796.00000 317.00000
655.00000 549.00000
634.00000 584.00000
442.00000 607.00000
418.00000 572.00000
420.00000 543.00000
405.00000 541.00000
385.00000 510.00000
343.00000 613.00000
344.00000 674.00000
IMAGE=CV 2-6 F.jpg
ID=CVG1- 6F 
LM=19
471.00000 655.00000
646.00000 662.00000
761.00000 662.00000
1012.00000 632.00000
1092.00000 572.00000
1104.00000 556.00000
956.00000 492.00000
897.00000 515.00000
782.00000 460.00000
807.00000 412.00000
735.00000 570.00000
722.00000 591.00000
567.00000 610.00000
550.00000 584.00000
553.00000 563.00000
540.00000 563.00000
522.00000 535.00000
492.00000 615.00000
490.00000 659.00000
IMAGE=CV 2-6 M.jpg
ID=CVG1- 6M 
LM=19
296.00000 721.00000
555.00000 739.00000
740.00000 741.00000
1127.00000 690.00000
1228.00000 620.00000
1246.00000 601.00000
1047.00000 477.00000
961.00000 515.00000
796.00000 402.00000
845.00000 327.00000
695.00000 588.00000
673.00000 624.00000
434.00000 651.00000
418.00000 611.00000
420.00000 574.00000
399.00000 572.00000
373.00000 532.00000
323.00000 659.00000
329.00000 726.00000
IMAGE=CV 2-8 F.jpg
ID=CVG1- 8F 
LM=19
355.00000 664.00000
572.00000 686.00000
716.00000 688.00000
1067.00000 651.00000
1158.00000 588.00000
1174.00000 567.00000
999.00000 466.00000
913.00000 494.00000
779.00000 400.00000
827.00000 335.00000
691.00000 558.00000
673.00000 588.00000
473.00000 606.00000
453.00000 573.00000
456.00000 545.00000
440.00000 543.00000
422.00000 511.00000
378.00000 611.00000
380.00000 670.00000
IMAGE=CV 2-9 F.jpg
ID=CVG1- 9F 
LM=19
310.00000 691.00000
562.00000 700.00000
740.00000 697.00000
1120.00000 643.00000
1222.00000 570.00000
1241.00000 541.00000
1046.00000 435.00000
963.00000 468.00000
783.00000 365.00000
827.00000 292.00000
688.00000 549.00000
666.00000 585.00000
436.00000 618.00000
416.00000 578.00000
416.00000 543.00000
399.00000 543.00000
369.00000 507.00000
332.00000 625.00000
341.00000 696.00000
IMAGE=CV 3-1 F.jpg
ID=CVG1- 1F 
LM=19
411.00000 665.00000
592.00000 662.00000
714.00000 668.00000
982.00000 654.00000
1062.00000 609.00000
1079.00000 593.00000
938.00000 497.00000
871.00000 523.00000
740.00000 443.00000
771.00000 394.00000
678.00000 570.00000
665.00000 595.00000
509.00000 609.00000
491.00000 584.00000
491.00000 559.00000
476.00000 560.00000
456.00000 531.00000
428.00000 620.00000
435.00000 668.00000
IMAGE=CV 3-1 M.jpg
ID=CVG1- 1M 
LM=19
299.00000 711.00000
553.00000 728.00000
716.00000 727.00000
1090.00000 681.00000
1196.00000 600.00000
1214.00000 576.00000
1029.00000 485.00000
942.00000 517.00000
776.00000 417.00000
819.00000 349.00000
674.00000 593.00000
647.00000 621.00000
426.00000 644.00000
407.00000 608.00000
413.00000 577.00000
392.00000 577.00000
370.00000 540.00000
321.00000 651.00000
329.00000 714.00000
IMAGE=CV 3-10 F.jpg
ID=CVG1-10F 
LM=19
314.00000 730.00000
567.00000 745.00000
736.00000 745.00000
1116.00000 696.00000
1220.00000 616.00000
1238.00000 590.00000
1023.00000 483.00000
946.00000 518.00000
780.00000 414.00000
828.00000 334.00000
694.00000 600.00000
676.00000 638.00000
452.00000 661.00000
432.00000 621.00000
434.00000 588.00000
412.00000 586.00000
385.00000 549.00000
342.00000 668.00000
342.00000 734.00000
IMAGE=CV 3-11 F.jpg
ID=CVG1-11F 
LM=19
358.00000 682.00000
570.00000 697.00000
712.00000 699.00000
1030.00000 654.00000
1112.00000 589.00000
1123.00000 575.00000
956.00000 479.00000
890.00000 506.00000
750.00000 426.00000
799.00000 361.00000
657.00000 576.00000
637.00000 603.00000
468.00000 627.00000
450.00000 593.00000
450.00000 567.00000
436.00000 568.00000
415.00000 537.00000
379.00000 632.00000
381.00000 685.00000
IMAGE=CV 3-12 F.jpg
ID=CVG1-12F 
LM=19
311.00000 679.00000
553.00000 697.00000
707.00000 695.00000
1084.00000 661.00000
1183.00000 588.00000
1200.00000 570.00000
1023.00000 457.00000
948.00000 485.00000
775.00000 380.00000
825.00000 309.00000
690.00000 556.00000
670.00000 591.00000
443.00000 612.00000
425.00000 575.00000
426.00000 541.00000
409.00000 541.00000
382.00000 503.00000
339.00000 622.00000
338.00000 683.00000
IMAGE=CV 3-13 F.jpg
ID=CVG1-13F 
LM=19
306.00000 684.00000
549.00000 705.00000
713.00000 707.00000
1097.00000 663.00000
1195.00000 590.00000
1213.00000 567.00000
1025.00000 468.00000
941.00000 498.00000
775.00000 401.00000
823.00000 323.00000
685.00000 568.00000
659.00000 605.00000
440.00000 622.00000
420.00000 585.00000
424.00000 552.00000
407.00000 552.00000
380.00000 517.00000
334.00000 623.00000
330.00000 686.00000
IMAGE=CV 3-14 F.jpg
ID=CVG1-14F 
LM=19
370.00000 696.00000
578.00000 707.00000
728.00000 707.00000
1066.00000 663.00000
1149.00000 600.00000
1163.00000 580.00000
990.00000 487.00000
923.00000 519.00000
785.00000 436.00000
829.00000 374.00000
701.00000 590.00000
683.00000 616.00000
491.00000 634.00000
471.00000 604.00000
476.00000 576.00000
456.00000 574.00000
434.00000 540.00000
399.00000 641.00000
396.00000 698.00000
IMAGE=CV 3-15 F.jpg
ID=CVG1-15F 
LM=19
410.00000 698.00000
611.00000 711.00000
734.00000 711.00000
1036.00000 667.00000
1111.00000 602.00000
1124.00000 585.00000
978.00000 495.00000
915.00000 524.00000
777.00000 444.00000
815.00000 387.00000
708.00000 595.00000
687.00000 621.00000
509.00000 642.00000
493.00000 612.00000
493.00000 586.00000
479.00000 585.00000
457.00000 556.00000
425.00000 648.00000
435.00000 702.00000
IMAGE=CV 3-16 F.jpg
ID=CVG1-16F 
LM=19
342.00000 677.00000
580.00000 695.00000
734.00000 696.00000
1089.00000 646.00000
1176.00000 572.00000
1187.00000 554.00000
1013.00000 449.00000
943.00000 478.00000
788.00000 387.00000
823.00000 315.00000
694.00000 556.00000
678.00000 591.00000
469.00000 614.00000
448.00000 577.00000
453.00000 545.00000
433.00000 543.00000
411.00000 505.00000
368.00000 618.00000
371.00000 683.00000
IMAGE=CV 3-17 F.jpg
ID=CVG1-17F 
LM=19
272.00000 703.00000
525.00000 721.00000
691.00000 719.00000
1072.00000 669.00000
1172.00000 597.00000
1190.00000 574.00000
981.00000 458.00000
899.00000 498.00000
742.00000 386.00000
782.00000 314.00000
649.00000 574.00000
626.00000 609.00000
401.00000 633.00000
382.00000 595.00000
383.00000 561.00000
367.00000 560.00000
342.00000 521.00000
298.00000 640.00000
299.00000 705.00000
IMAGE=CV 3-2 F.jpg
ID=CVG1- 2F 
LM=19
320.00000 699.00000
559.00000 713.00000
713.00000 713.00000
1053.00000 670.00000
1151.00000 614.00000
1172.00000 593.00000
978.00000 483.00000
883.00000 517.00000
734.00000 417.00000
775.00000 348.00000
660.00000 580.00000
640.00000 615.00000
440.00000 634.00000
425.00000 598.00000
428.00000 563.00000
409.00000 560.00000
381.00000 522.00000
343.00000 640.00000
343.00000 702.00000
IMAGE=CV 3-2 M.jpg
ID=CVG1- 2M 
LM=19
305.00000 706.00000
550.00000 722.00000
725.00000 723.00000
1084.00000 672.00000
1180.00000 596.00000
1199.00000 568.00000
995.00000 460.00000
927.00000 495.00000
764.00000 393.00000
818.00000 317.00000
656.00000 582.00000
633.00000 613.00000
435.00000 639.00000
415.00000 600.00000
418.00000 565.00000
401.00000 567.00000
371.00000 527.00000
329.00000 644.00000
336.00000 709.00000
IMAGE=CV 3-3 F.jpg
ID=CVG1- 3F 
LM=19
379.00000 649.00000
565.00000 662.00000
680.00000 660.00000
955.00000 626.00000
1030.00000 576.00000
1044.00000 559.00000
891.00000 476.00000
825.00000 505.00000
696.00000 432.00000
733.00000 380.00000
654.00000 560.00000
637.00000 583.00000
476.00000 599.00000
459.00000 571.00000
460.00000 547.00000
445.00000 549.00000
427.00000 519.00000
397.00000 604.00000
402.00000 653.00000
IMAGE=CV 3-3 M.jpg
ID=CVG1- 3M 
LM=19
294.00000 690.00000
548.00000 711.00000
711.00000 713.00000
1106.00000 673.00000
1205.00000 601.00000
1221.00000 580.00000
1020.00000 460.00000
943.00000 497.00000
775.00000 387.00000
819.00000 315.00000
686.00000 570.00000
663.00000 601.00000
435.00000 626.00000
418.00000 587.00000
421.00000 547.00000
401.00000 549.00000
371.00000 508.00000
325.00000 630.00000
326.00000 696.00000
IMAGE=CV 3-4 F.jpg
ID=CVG1- 4F 
LM=19
395.00000 671.00000
587.00000 685.00000
715.00000 685.00000
985.00000 651.00000
1061.00000 598.00000
1075.00000 581.00000
920.00000 489.00000
858.00000 514.00000
733.00000 441.00000
769.00000 384.00000
670.00000 575.00000
650.00000 603.00000
496.00000 621.00000
479.00000 591.00000
479.00000 565.00000
462.00000 565.00000
442.00000 535.00000
417.00000 626.00000
422.00000 677.00000
IMAGE=CV 3-4 M.jpg
ID=CVG1- 4M 
LM=19
375.00000 653.00000
568.00000 672.00000
697.00000 675.00000
1003.00000 632.00000
1086.00000 563.00000
1097.00000 545.00000
938.00000 464.00000
869.00000 497.00000
742.00000 421.00000
780.00000 360.00000
673.00000 559.00000
656.00000 588.00000
481.00000 604.00000
465.00000 572.00000
466.00000 548.00000
451.00000 548.00000
432.00000 516.00000
396.00000 605.00000
398.00000 656.00000
IMAGE=CV 3-5 F.jpg
ID=CVG1- 5F 
LM=19
385.00000 683.00000
602.00000 695.00000
747.00000 691.00000
1067.00000 650.00000
1157.00000 591.00000
1172.00000 570.00000
993.00000 478.00000
923.00000 512.00000
776.00000 424.00000
817.00000 362.00000
703.00000 575.00000
685.00000 605.00000
502.00000 627.00000
482.00000 595.00000
484.00000 567.00000
470.00000 567.00000
444.00000 531.00000
410.00000 632.00000
412.00000 686.00000
IMAGE=CV 3-5 M.jpg
ID=CVG1- 5M 
LM=19
366.00000 657.00000
561.00000 673.00000
689.00000 673.00000
991.00000 633.00000
1086.00000 569.00000
1098.00000 555.00000
939.00000 457.00000
878.00000 480.00000
746.00000 399.00000
781.00000 344.00000
669.00000 554.00000
653.00000 580.00000
473.00000 603.00000
457.00000 571.00000
458.00000 541.00000
443.00000 542.00000
419.00000 511.00000
386.00000 608.00000
386.00000 659.00000
IMAGE=CV 3-6 F.jpg
ID=CVG1- 6F 
LM=19
413.00000 675.00000
596.00000 693.00000
711.00000 692.00000
977.00000 659.00000
1047.00000 611.00000
1057.00000 597.00000
923.00000 511.00000
865.00000 536.00000
736.00000 467.00000
772.00000 416.00000
691.00000 589.00000
675.00000 611.00000
510.00000 628.00000
499.00000 599.00000
501.00000 575.00000
488.00000 574.00000
468.00000 543.00000
434.00000 631.00000
434.00000 678.00000
IMAGE=CV 3-6 M.jpg
ID=CVG1- 6M 
LM=19
378.00000 662.00000
589.00000 677.00000
717.00000 677.00000
1034.00000 638.00000
1126.00000 570.00000
1139.00000 547.00000
971.00000 461.00000
905.00000 492.00000
768.00000 410.00000
811.00000 350.00000
692.00000 562.00000
671.00000 589.00000
490.00000 611.00000
473.00000 577.00000
474.00000 551.00000
457.00000 552.00000
436.00000 520.00000
400.00000 615.00000
403.00000 667.00000
IMAGE=CV 3-7 F.jpg
ID=CVG1- 7F 
LM=19
409.00000 687.00000
586.00000 697.00000
700.00000 696.00000
963.00000 658.00000
1036.00000 609.00000
1049.00000 593.00000
909.00000 515.00000
839.00000 543.00000
720.00000 475.00000
750.00000 424.00000
666.00000 597.00000
652.00000 620.00000
503.00000 636.00000
489.00000 611.00000
491.00000 589.00000
475.00000 589.00000
456.00000 559.00000
427.00000 643.00000
430.00000 690.00000
IMAGE=CV 3-7 M.jpg
ID=CVG1- 7M 
LM=19
365.00000 660.00000
574.00000 670.00000
715.00000 671.00000
1006.00000 625.00000
1084.00000 559.00000
1097.00000 539.00000
942.00000 444.00000
877.00000 478.00000
740.00000 396.00000
773.00000 341.00000
661.00000 553.00000
645.00000 577.00000
475.00000 604.00000
456.00000 571.00000
458.00000 549.00000
442.00000 547.00000
418.00000 516.00000
386.00000 608.00000
390.00000 660.00000
IMAGE=CV 3-8 F.jpg
ID=CVG1- 8F 
LM=19
393.00000 680.00000
597.00000 695.00000
734.00000 699.00000
1062.00000 655.00000
1138.00000 594.00000
1149.00000 575.00000
987.00000 494.00000
918.00000 525.00000
788.00000 441.00000
838.00000 380.00000
708.00000 582.00000
687.00000 609.00000
504.00000 624.00000
487.00000 598.00000
489.00000 568.00000
476.00000 570.00000
455.00000 537.00000
419.00000 630.00000
419.00000 685.00000
IMAGE=CV 3-9 F.jpg
ID=CVG1- 9F 
LM=19
337.00000 687.00000
580.00000 697.00000
734.00000 692.00000
1113.00000 636.00000
1216.00000 563.00000
1232.00000 540.00000
1036.00000 434.00000
957.00000 468.00000
793.00000 377.00000
834.00000 303.00000
693.00000 557.00000
677.00000 590.00000
469.00000 618.00000
448.00000 579.00000
450.00000 549.00000
431.00000 548.00000
404.00000 511.00000
356.00000 627.00000
368.00000 692.00000
IMAGE=CV 4-1 F.jpg
ID=CVG2- 1F 
LM=19
367.00000 676.00000
600.00000 694.00000
743.00000 691.00000
1075.00000 631.00000
1157.00000 564.00000
1176.00000 542.00000
989.00000 456.00000
918.00000 492.00000
768.00000 429.00000
797.00000 354.00000
688.00000 575.00000
670.00000 603.00000
487.00000 627.00000
468.00000 594.00000
474.00000 565.00000
458.00000 564.00000
435.00000 525.00000
386.00000 630.00000
397.00000 681.00000
IMAGE=CV 4-1 M.jpg
ID=CVG2- 1M 
LM=19
269.00000 679.00000
527.00000 699.00000
693.00000 698.00000
1070.00000 640.00000
1172.00000 574.00000
1193.00000 553.00000
981.00000 431.00000
902.00000 464.00000
742.00000 357.00000
788.00000 282.00000
642.00000 544.00000
622.00000 584.00000
400.00000 610.00000
387.00000 570.00000
386.00000 538.00000
370.00000 539.00000
339.00000 500.00000
294.00000 620.00000
298.00000 683.00000
IMAGE=CV 4-2 F.jpg
ID=CVG2- 2F 
LM=19
349.00000 662.00000
588.00000 670.00000
743.00000 667.00000
1083.00000 620.00000
1180.00000 558.00000
1196.00000 539.00000
993.00000 430.00000
920.00000 469.00000
764.00000 395.00000
805.00000 321.00000
689.00000 547.00000
667.00000 575.00000
470.00000 597.00000
452.00000 566.00000
458.00000 533.00000
439.00000 530.00000
413.00000 491.00000
372.00000 605.00000
379.00000 666.00000
IMAGE=CV 4-2 M.jpg
ID=CVG2- 2M 
LM=19
340.00000 684.00000
591.00000 697.00000
750.00000 693.00000
1129.00000 632.00000
1220.00000 561.00000
1238.00000 537.00000
1053.00000 437.00000
972.00000 469.00000
807.00000 368.00000
850.00000 296.00000
688.00000 558.00000
675.00000 589.00000
468.00000 615.00000
451.00000 576.00000
450.00000 544.00000
433.00000 545.00000
409.00000 508.00000
367.00000 620.00000
371.00000 688.00000
IMAGE=CV 4-3 F.jpg
ID=CVG2- 3F 
LM=19
312.00000 711.00000
548.00000 729.00000
700.00000 728.00000
1041.00000 687.00000
1134.00000 632.00000
1152.00000 611.00000
961.00000 494.00000
890.00000 526.00000
719.00000 436.00000
758.00000 363.00000
627.00000 597.00000
612.00000 629.00000
435.00000 651.00000
419.00000 615.00000
417.00000 586.00000
401.00000 584.00000
377.00000 544.00000
338.00000 657.00000
343.00000 717.00000
IMAGE=CV 4-3 M.jpg
ID=CVG2- 3M 
LM=19
335.00000 666.00000
602.00000 703.00000
764.00000 699.00000
1129.00000 625.00000
1220.00000 543.00000
1235.00000 522.00000
1062.00000 449.00000
991.00000 489.00000
824.00000 386.00000
865.00000 308.00000
725.00000 550.00000
699.00000 591.00000
480.00000 610.00000
463.00000 567.00000
468.00000 529.00000
447.00000 525.00000
427.00000 489.00000
370.00000 604.00000
372.00000 673.00000
IMAGE=CV 4-4 F.jpg
ID=CVG2- 4F 
LM=19
334.00000 671.00000
566.00000 685.00000
724.00000 683.00000
1069.00000 645.00000
1164.00000 588.00000
1183.00000 567.00000
978.00000 448.00000
911.00000 480.00000
743.00000 390.00000
786.00000 317.00000
674.00000 549.00000
652.00000 583.00000
451.00000 604.00000
439.00000 568.00000
440.00000 536.00000
425.00000 533.00000
393.00000 495.00000
357.00000 611.00000
362.00000 674.00000
IMAGE=CV 4-4 M.jpg
ID=CVG2- 4M 
LM=19
415.00000 698.00000
652.00000 712.00000
801.00000 705.00000
1131.00000 653.00000
1223.00000 594.00000
1241.00000 572.00000
1039.00000 468.00000
965.00000 508.00000
812.00000 426.00000
848.00000 360.00000
746.00000 579.00000
726.00000 609.00000
540.00000 638.00000
520.00000 603.00000
521.00000 569.00000
504.00000 570.00000
481.00000 530.00000
438.00000 645.00000
446.00000 704.00000
IMAGE=CV 4-5 M.jpg
ID=CVG2- 5M 
LM=19
297.00000 718.00000
549.00000 723.00000
720.00000 725.00000
1115.00000 692.00000
1216.00000 622.00000
1232.00000 603.00000
1028.00000 475.00000
944.00000 516.00000
781.00000 410.00000
827.00000 326.00000
670.00000 592.00000
647.00000 620.00000
428.00000 646.00000
405.00000 613.00000
406.00000 579.00000
391.00000 579.00000
365.00000 540.00000
323.00000 655.00000
326.00000 720.00000
IMAGE=CV E lab 1-1 F .jpg
ID=CVE7- 1F 
LM=19
339.00000 703.00000
579.00000 711.00000
742.00000 711.00000
1088.00000 672.00000
1179.00000 613.00000
1199.00000 590.00000
1006.00000 480.00000
933.00000 515.00000
768.00000 422.00000
807.00000 354.00000
686.00000 585.00000
660.00000 614.00000
468.00000 634.00000
449.00000 600.00000
451.00000 566.00000
433.00000 565.00000
408.00000 522.00000
364.00000 644.00000
367.00000 706.00000
IMAGE=CV E lab 1-1 M .jpg
ID=CVE7- 1M 
LM=19
283.00000 724.00000
546.00000 737.00000
731.00000 736.00000
1116.00000 686.00000
1219.00000 617.00000
1238.00000 594.00000
1025.00000 462.00000
946.00000 499.00000
769.00000 399.00000
825.00000 312.00000
668.00000 588.00000
648.00000 622.00000
419.00000 653.00000
396.00000 615.00000
398.00000 579.00000
379.00000 579.00000
348.00000 537.00000
311.00000 661.00000
313.00000 728.00000
IMAGE=CV E lab 1-10 F .jpg
ID=CVE7-10F 
LM=19
324.00000 711.00000
556.00000 723.00000
717.00000 721.00000
1059.00000 688.00000
1158.00000 630.00000
1178.00000 607.00000
976.00000 490.00000
900.00000 526.00000
733.00000 432.00000
773.00000 359.00000
664.00000 592.00000
636.00000 622.00000
451.00000 645.00000
429.00000 608.00000
431.00000 577.00000
409.00000 576.00000
387.00000 537.00000
347.00000 654.00000
353.00000 713.00000
IMAGE=CV E lab 1-10 M .jpg
ID=CVE7-10M 
LM=19
306.00000 702.00000
561.00000 710.00000
735.00000 711.00000
1125.00000 672.00000
1227.00000 603.00000
1247.00000 582.00000
1051.00000 456.00000
970.00000 494.00000
794.00000 386.00000
839.00000 310.00000
673.00000 576.00000
647.00000 606.00000
444.00000 631.00000
419.00000 591.00000
419.00000 559.00000
402.00000 559.00000
375.00000 518.00000
332.00000 638.00000
335.00000 705.00000
IMAGE=CV E lab 1-11 F .jpg
ID=CVE7-11F 
LM=19
374.00000 701.00000
603.00000 712.00000
758.00000 711.00000
1093.00000 676.00000
1178.00000 622.00000
1197.00000 603.00000
1013.00000 489.00000
950.00000 518.00000
784.00000 436.00000
825.00000 370.00000
701.00000 590.00000
681.00000 617.00000
496.00000 640.00000
476.00000 604.00000
478.00000 573.00000
460.00000 575.00000
438.00000 537.00000
401.00000 646.00000
401.00000 706.00000
IMAGE=CV E lab 1-11 M .jpg
ID=CVE7-11M 
LM=19
371.00000 706.00000
604.00000 715.00000
758.00000 717.00000
1121.00000 679.00000
1208.00000 619.00000
1229.00000 591.00000
1039.00000 477.00000
954.00000 519.00000
793.00000 424.00000
839.00000 353.00000
712.00000 587.00000
689.00000 619.00000
492.00000 640.00000
476.00000 606.00000
480.00000 573.00000
462.00000 572.00000
435.00000 531.00000
399.00000 649.00000
398.00000 711.00000
IMAGE=CV E lab 1-12 F .jpg
ID=CVE7-12F 
LM=19
333.00000 724.00000
564.00000 734.00000
723.00000 730.00000
1075.00000 682.00000
1165.00000 624.00000
1189.00000 595.00000
985.00000 485.00000
909.00000 519.00000
740.00000 435.00000
783.00000 362.00000
661.00000 604.00000
639.00000 632.00000
454.00000 661.00000
433.00000 627.00000
435.00000 590.00000
416.00000 590.00000
394.00000 552.00000
358.00000 669.00000
364.00000 730.00000
IMAGE=CV E lab 1-12 M .jpg
ID=CVE7-12M 
LM=19
328.00000 730.00000
578.00000 739.00000
742.00000 738.00000
1103.00000 700.00000
1204.00000 627.00000
1223.00000 601.00000
1032.00000 477.00000
954.00000 517.00000
795.00000 408.00000
836.00000 330.00000
689.00000 599.00000
667.00000 632.00000
454.00000 661.00000
438.00000 623.00000
440.00000 590.00000
419.00000 590.00000
391.00000 552.00000
354.00000 669.00000
359.00000 733.00000
IMAGE=CV E lab 1-13 F .jpg
ID=CVE7-13F 
LM=19
357.00000 695.00000
583.00000 706.00000
734.00000 705.00000
1064.00000 662.00000
1157.00000 602.00000
1177.00000 582.00000
991.00000 466.00000
924.00000 502.00000
760.00000 416.00000
797.00000 345.00000
674.00000 579.00000
653.00000 609.00000
480.00000 633.00000
459.00000 598.00000
461.00000 566.00000
441.00000 564.00000
420.00000 528.00000
379.00000 639.00000
381.00000 698.00000
IMAGE=CV E lab 1-13 M .jpg
ID=CVE7-13M 
LM=19
321.00000 682.00000
569.00000 692.00000
727.00000 693.00000
1113.00000 642.00000
1208.00000 575.00000
1224.00000 557.00000
1028.00000 443.00000
952.00000 477.00000
782.00000 380.00000
826.00000 307.00000
678.00000 557.00000
658.00000 588.00000
452.00000 617.00000
429.00000 579.00000
434.00000 545.00000
416.00000 545.00000
389.00000 508.00000
345.00000 622.00000
353.00000 686.00000
IMAGE=CV E lab 1-14 F .jpg
ID=CVE7-14F 
LM=19
350.00000 694.00000
575.00000 705.00000
717.00000 707.00000
1054.00000 669.00000
1138.00000 617.00000
1154.00000 603.00000
980.00000 496.00000
910.00000 527.00000
753.00000 442.00000
787.00000 380.00000
667.00000 591.00000
646.00000 616.00000
467.00000 634.00000
451.00000 600.00000
455.00000 567.00000
438.00000 567.00000
417.00000 529.00000
373.00000 639.00000
379.00000 696.00000
IMAGE=CV E lab 1-14 M .jpg
ID=CVE7-14M 
LM=19
309.00000 717.00000
573.00000 730.00000
735.00000 728.00000
1120.00000 677.00000
1219.00000 599.00000
1238.00000 573.00000
1042.00000 459.00000
966.00000 499.00000
794.00000 399.00000
836.00000 322.00000
692.00000 589.00000
665.00000 623.00000
448.00000 651.00000
425.00000 610.00000
424.00000 574.00000
402.00000 577.00000
378.00000 539.00000
334.00000 659.00000
336.00000 722.00000
IMAGE=CV E lab 1-15 F .jpg
ID=CVE7-15F 
LM=19
346.00000 697.00000
573.00000 707.00000
733.00000 707.00000
1065.00000 675.00000
1163.00000 620.00000
1182.00000 600.00000
992.00000 481.00000
915.00000 519.00000
746.00000 429.00000
791.00000 355.00000
672.00000 584.00000
652.00000 612.00000
467.00000 634.00000
446.00000 599.00000
448.00000 567.00000
430.00000 568.00000
406.00000 532.00000
370.00000 642.00000
374.00000 703.00000
IMAGE=CV E lab 1-15 M .jpg
ID=CVE7-15M 
LM=19
336.00000 702.00000
579.00000 714.00000
733.00000 715.00000
1101.00000 688.00000
1200.00000 618.00000
1218.00000 598.00000
1031.00000 474.00000
958.00000 508.00000
796.00000 401.00000
841.00000 328.00000
697.00000 576.00000
674.00000 609.00000
471.00000 634.00000
452.00000 600.00000
450.00000 565.00000
432.00000 566.00000
401.00000 528.00000
367.00000 642.00000
365.00000 704.00000
IMAGE=CV E lab 1-16 F .jpg
ID=CVE7-16F 
LM=19
352.00000 686.00000
577.00000 696.00000
734.00000 692.00000
1076.00000 662.00000
1172.00000 609.00000
1195.00000 586.00000
1001.00000 465.00000
923.00000 501.00000
753.00000 410.00000
795.00000 339.00000
678.00000 567.00000
655.00000 596.00000
471.00000 622.00000
452.00000 586.00000
451.00000 556.00000
435.00000 557.00000
406.00000 518.00000
380.00000 632.00000
385.00000 692.00000
IMAGE=CV E lab 1-16 M .jpg
ID=CVE7-16M 
LM=19
315.00000 699.00000
565.00000 721.00000
730.00000 722.00000
1116.00000 673.00000
1217.00000 604.00000
1231.00000 585.00000
1036.00000 473.00000
953.00000 509.00000
791.00000 406.00000
838.00000 329.00000
700.00000 582.00000
679.00000 611.00000
458.00000 634.00000
430.00000 595.00000
433.00000 560.00000
410.00000 559.00000
389.00000 519.00000
339.00000 640.00000
347.00000 704.00000
IMAGE=CV E lab 1-17 F .jpg
ID=CVE7-17F 
LM=19
361.00000 696.00000
592.00000 712.00000
749.00000 712.00000
1083.00000 673.00000
1175.00000 612.00000
1200.00000 588.00000
1004.00000 476.00000
930.00000 510.00000
779.00000 427.00000
820.00000 351.00000
703.00000 586.00000
677.00000 614.00000
485.00000 636.00000
467.00000 599.00000
467.00000 564.00000
452.00000 567.00000
426.00000 524.00000
390.00000 640.00000
393.00000 702.00000
IMAGE=CV E lab 1-17 M .jpg
ID=CVE7-17M 
LM=19
315.00000 711.00000
560.00000 724.00000
732.00000 726.00000
1083.00000 694.00000
1190.00000 626.00000
1210.00000 606.00000
1027.00000 483.00000
946.00000 519.00000
779.00000 414.00000
828.00000 338.00000
673.00000 590.00000
648.00000 618.00000
450.00000 645.00000
430.00000 607.00000
430.00000 574.00000
411.00000 576.00000
385.00000 536.00000
342.00000 653.00000
342.00000 715.00000
IMAGE=CV E lab 1-18 F .jpg
ID=CVE7-18F 
LM=19
375.00000 704.00000
600.00000 715.00000
745.00000 713.00000
1091.00000 670.00000
1180.00000 613.00000
1200.00000 589.00000
1012.00000 474.00000
943.00000 512.00000
771.00000 425.00000
812.00000 362.00000
697.00000 588.00000
674.00000 618.00000
495.00000 642.00000
474.00000 606.00000
471.00000 575.00000
456.00000 575.00000
434.00000 536.00000
398.00000 650.00000
401.00000 706.00000
IMAGE=CV E lab 1-18 M .jpg
ID=CVE7-18M 
LM=19
314.00000 700.00000
560.00000 711.00000
723.00000 709.00000
1089.00000 664.00000
1188.00000 593.00000
1206.00000 575.00000
1014.00000 454.00000
939.00000 491.00000
775.00000 392.00000
825.00000 315.00000
687.00000 569.00000
665.00000 603.00000
446.00000 631.00000
426.00000 592.00000
426.00000 562.00000
408.00000 564.00000
380.00000 522.00000
340.00000 641.00000
344.00000 703.00000
IMAGE=CV E lab 1-19 F .jpg
ID=CVE7-19F 
LM=19
357.00000 712.00000
582.00000 721.00000
737.00000 722.00000
1072.00000 685.00000
1165.00000 628.00000
1187.00000 609.00000
1001.00000 489.00000
935.00000 522.00000
766.00000 429.00000
803.00000 364.00000
683.00000 597.00000
660.00000 625.00000
476.00000 652.00000
458.00000 614.00000
458.00000 585.00000
441.00000 583.00000
417.00000 545.00000
379.00000 657.00000
381.00000 717.00000
IMAGE=CV E lab 1-19 M .jpg
ID=CVE7-19M 
LM=19
283.00000 737.00000
535.00000 755.00000
716.00000 759.00000
1099.00000 718.00000
1205.00000 655.00000
1226.00000 633.00000
1033.00000 502.00000
952.00000 532.00000
782.00000 424.00000
829.00000 348.00000
657.00000 613.00000
631.00000 646.00000
414.00000 667.00000
395.00000 631.00000
398.00000 595.00000
379.00000 594.00000
353.00000 551.00000
310.00000 674.00000
311.00000 741.00000
IMAGE=CV E lab 1-2 F .jpg
ID=CVE7- 2F 
LM=19
333.00000 687.00000
561.00000 704.00000
718.00000 704.00000
1056.00000 672.00000
1155.00000 620.00000
1177.00000 598.00000
994.00000 474.00000
913.00000 506.00000
747.00000 413.00000
789.00000 343.00000
661.00000 575.00000
636.00000 604.00000
457.00000 627.00000
436.00000 591.00000
438.00000 556.00000
419.00000 554.00000
394.00000 517.00000
360.00000 632.00000
359.00000 693.00000
IMAGE=CV E lab 1-2 M .jpg
ID=CVE7- 2M 
LM=19
318.00000 685.00000
544.00000 699.00000
705.00000 700.00000
1069.00000 644.00000
1156.00000 580.00000
1176.00000 558.00000
984.00000 458.00000
913.00000 489.00000
752.00000 407.00000
797.00000 338.00000
650.00000 571.00000
630.00000 600.00000
440.00000 622.00000
419.00000 588.00000
420.00000 557.00000
401.00000 558.00000
380.00000 522.00000
344.00000 628.00000
346.00000 690.00000
IMAGE=CV E lab 1-20 F .jpg
ID=CVE7-20F 
LM=19
335.00000 705.00000
563.00000 720.00000
717.00000 718.00000
1051.00000 681.00000
1133.00000 626.00000
1150.00000 608.00000
973.00000 494.00000
896.00000 526.00000
732.00000 437.00000
768.00000 377.00000
658.00000 597.00000
636.00000 625.00000
458.00000 646.00000
439.00000 608.00000
438.00000 579.00000
422.00000 579.00000
400.00000 541.00000
361.00000 651.00000
364.00000 709.00000
IMAGE=CV E lab 1-20 M .jpg
ID=CVE7-20M 
LM=19
305.00000 706.00000
565.00000 715.00000
741.00000 716.00000
1138.00000 672.00000
1240.00000 600.00000
1257.00000 576.00000
1046.00000 453.00000
961.00000 494.00000
793.00000 388.00000
843.00000 304.00000
684.00000 576.00000
658.00000 609.00000
447.00000 635.00000
422.00000 594.00000
422.00000 561.00000
404.00000 562.00000
376.00000 521.00000
333.00000 642.00000
336.00000 709.00000
IMAGE=CV E lab 1-21 F .jpg
ID=CVE7-21F 
LM=19
351.00000 730.00000
588.00000 737.00000
736.00000 736.00000
1073.00000 704.00000
1167.00000 644.00000
1185.00000 625.00000
1001.00000 515.00000
935.00000 547.00000
766.00000 453.00000
803.00000 383.00000
692.00000 612.00000
669.00000 638.00000
476.00000 664.00000
459.00000 630.00000
461.00000 599.00000
443.00000 599.00000
418.00000 560.00000
374.00000 673.00000
383.00000 733.00000
IMAGE=CV E lab 1-21 M .jpg
ID=CVE7-21M 
LM=19
321.00000 696.00000
565.00000 709.00000
730.00000 709.00000
1111.00000 663.00000
1207.00000 597.00000
1225.00000 580.00000
1034.00000 464.00000
962.00000 492.00000
776.00000 400.00000
828.00000 327.00000
687.00000 573.00000
664.00000 603.00000
451.00000 631.00000
432.00000 594.00000
433.00000 558.00000
414.00000 561.00000
387.00000 525.00000
346.00000 640.00000
344.00000 699.00000
IMAGE=CV E lab 1-22 F .jpg
ID=CVE7-22F 
LM=19
332.00000 714.00000
566.00000 727.00000
728.00000 726.00000
1085.00000 692.00000
1182.00000 630.00000
1204.00000 603.00000
997.00000 482.00000
918.00000 519.00000
748.00000 427.00000
788.00000 358.00000
670.00000 595.00000
644.00000 627.00000
455.00000 648.00000
437.00000 612.00000
435.00000 576.00000
420.00000 578.00000
393.00000 538.00000
365.00000 655.00000
366.00000 720.00000
IMAGE=CV E lab 1-22 M .jpg
ID=CVE7-22M 
LM=19
321.00000 709.00000
562.00000 722.00000
733.00000 721.00000
1105.00000 668.00000
1202.00000 600.00000
1221.00000 579.00000
1026.00000 462.00000
954.00000 494.00000
778.00000 401.00000
816.00000 327.00000
676.00000 582.00000
650.00000 613.00000
452.00000 642.00000
427.00000 605.00000
429.00000 573.00000
413.00000 573.00000
385.00000 532.00000
351.00000 650.00000
350.00000 712.00000
IMAGE=CV E lab 1-24 F.jpg
ID=CVE7-24F 
LM=19
324.00000 709.00000
582.00000 718.00000
755.00000 720.00000
1137.00000 672.00000
1234.00000 608.00000
1256.00000 584.00000
1060.00000 461.00000
978.00000 500.00000
810.00000 392.00000
856.00000 319.00000
697.00000 580.00000
676.00000 611.00000
458.00000 637.00000
434.00000 602.00000
437.00000 567.00000
419.00000 570.00000
392.00000 528.00000
351.00000 646.00000
359.00000 714.00000
IMAGE=CV E lab 1-23 F .jpg
ID=CVE7-23F 
LM=19
324.00000 695.00000
566.00000 709.00000
727.00000 708.00000
1088.00000 669.00000
1181.00000 613.00000
1201.00000 591.00000
1005.00000 467.00000
926.00000 505.00000
747.00000 415.00000
797.00000 339.00000
665.00000 578.00000
637.00000 607.00000
452.00000 630.00000
430.00000 590.00000
433.00000 559.00000
416.00000 557.00000
390.00000 517.00000
349.00000 636.00000
357.00000 699.00000
IMAGE=CV E lab 1-23 M .jpg
ID=CVE7-23M 
LM=19
374.00000 711.00000
605.00000 726.00000
762.00000 724.00000
1111.00000 686.00000
1211.00000 620.00000
1231.00000 598.00000
1036.00000 480.00000
957.00000 520.00000
786.00000 428.00000
826.00000 357.00000
715.00000 594.00000
690.00000 627.00000
497.00000 649.00000
478.00000 615.00000
476.00000 579.00000
460.00000 580.00000
431.00000 541.00000
398.00000 655.00000
404.00000 719.00000
IMAGE=CV E lab 1-24 M .jpg
ID=CVE7-24M 
LM=19
351.00000 682.00000
578.00000 689.00000
734.00000 689.00000
1071.00000 647.00000
1180.00000 588.00000
1198.00000 572.00000
1015.00000 450.00000
933.00000 478.00000
783.00000 392.00000
823.00000 323.00000
675.00000 558.00000
659.00000 585.00000
474.00000 616.00000
453.00000 580.00000
456.00000 551.00000
437.00000 549.00000
412.00000 516.00000
371.00000 623.00000
380.00000 685.00000
IMAGE=CV E lab 1-25 F .jpg
ID=CVE7-25F 
LM=19
334.00000 667.00000
566.00000 678.00000
721.00000 678.00000
1069.00000 645.00000
1164.00000 589.00000
1184.00000 568.00000
995.00000 442.00000
920.00000 476.00000
750.00000 386.00000
788.00000 320.00000
683.00000 550.00000
656.00000 580.00000
465.00000 602.00000
442.00000 564.00000
446.00000 532.00000
429.00000 532.00000
404.00000 492.00000
363.00000 609.00000
365.00000 671.00000
IMAGE=CV E lab 1-25 M .jpg
ID=CVE7-25M 
LM=19
398.00000 670.00000
616.00000 678.00000
760.00000 676.00000
1076.00000 647.00000
1188.00000 585.00000
1209.00000 564.00000
1044.00000 442.00000
949.00000 476.00000
814.00000 385.00000
855.00000 320.00000
705.00000 551.00000
691.00000 580.00000
513.00000 605.00000
493.00000 574.00000
499.00000 544.00000
481.00000 547.00000
452.00000 515.00000
416.00000 616.00000
427.00000 673.00000
IMAGE=CV E lab 1-26 F .jpg
ID=CVE7-26F 
LM=19
348.00000 665.00000
590.00000 684.00000
743.00000 681.00000
1070.00000 641.00000
1164.00000 588.00000
1185.00000 563.00000
995.00000 447.00000
929.00000 477.00000
766.00000 388.00000
808.00000 317.00000
692.00000 554.00000
664.00000 580.00000
480.00000 604.00000
460.00000 564.00000
459.00000 529.00000
443.00000 529.00000
415.00000 491.00000
373.00000 610.00000
376.00000 671.00000
IMAGE=CV E lab 1-26 M .jpg
ID=CVE7-26M 
LM=19
343.00000 665.00000
565.00000 675.00000
702.00000 675.00000
1034.00000 641.00000
1139.00000 577.00000
1150.00000 563.00000
976.00000 439.00000
892.00000 477.00000
759.00000 389.00000
797.00000 320.00000
642.00000 551.00000
625.00000 576.00000
454.00000 604.00000
443.00000 571.00000
441.00000 545.00000
424.00000 545.00000
401.00000 509.00000
365.00000 612.00000
370.00000 669.00000
IMAGE=CV E lab 1-27 F .jpg
ID=CVE7-27F 
LM=19
347.00000 683.00000
563.00000 692.00000
719.00000 693.00000
1054.00000 663.00000
1155.00000 606.00000
1174.00000 583.00000
980.00000 465.00000
902.00000 501.00000
739.00000 415.00000
776.00000 346.00000
667.00000 570.00000
648.00000 597.00000
460.00000 622.00000
447.00000 585.00000
449.00000 555.00000
432.00000 558.00000
405.00000 522.00000
371.00000 630.00000
381.00000 688.00000
IMAGE=CV E lab 1-27 M .jpg
ID=CVE7-27M 
LM=19
379.00000 653.00000
605.00000 666.00000
755.00000 664.00000
1096.00000 625.00000
1204.00000 554.00000
1220.00000 538.00000
1032.00000 415.00000
947.00000 447.00000
792.00000 356.00000
834.00000 292.00000
695.00000 530.00000
675.00000 558.00000
497.00000 592.00000
476.00000 556.00000
476.00000 521.00000
458.00000 525.00000
432.00000 490.00000
402.00000 598.00000
405.00000 657.00000
IMAGE=CV E lab 1-28 F .jpg
ID=CVE7-28F 
LM=19
361.00000 714.00000
565.00000 732.00000
722.00000 731.00000
1046.00000 696.00000
1145.00000 635.00000
1171.00000 611.00000
972.00000 509.00000
907.00000 536.00000
760.00000 458.00000
796.00000 393.00000
684.00000 606.00000
656.00000 635.00000
484.00000 657.00000
461.00000 621.00000
462.00000 592.00000
447.00000 593.00000
418.00000 554.00000
389.00000 662.00000
390.00000 717.00000
IMAGE=CV E lab 1-28 M .jpg
ID=CVE7-28M 
LM=19
343.00000 637.00000
556.00000 650.00000
707.00000 650.00000
1020.00000 615.00000
1127.00000 559.00000
1146.00000 538.00000
973.00000 412.00000
889.00000 442.00000
758.00000 355.00000
799.00000 287.00000
644.00000 523.00000
628.00000 549.00000
455.00000 578.00000
439.00000 542.00000
444.00000 514.00000
425.00000 513.00000
399.00000 478.00000
364.00000 582.00000
368.00000 640.00000
IMAGE=CV E lab 1-29 F .jpg
ID=CVE7-29F 
LM=19
333.00000 703.00000
561.00000 713.00000
717.00000 710.00000
1062.00000 667.00000
1151.00000 607.00000
1171.00000 585.00000
979.00000 476.00000
906.00000 507.00000
744.00000 419.00000
784.00000 348.00000
658.00000 585.00000
637.00000 610.00000
456.00000 639.00000
439.00000 603.00000
440.00000 569.00000
422.00000 567.00000
394.00000 531.00000
358.00000 648.00000
363.00000 707.00000
IMAGE=CV E lab 1-29 M .jpg
ID=CVE7-29M 
LM=19
293.00000 723.00000
555.00000 736.00000
731.00000 737.00000
1126.00000 697.00000
1221.00000 633.00000
1245.00000 607.00000
1047.00000 487.00000
960.00000 521.00000
788.00000 416.00000
836.00000 341.00000
685.00000 603.00000
657.00000 630.00000
438.00000 655.00000
412.00000 613.00000
419.00000 582.00000
398.00000 580.00000
370.00000 538.00000
323.00000 660.00000
327.00000 726.00000
IMAGE=CV E lab 1-3 F .jpg
ID=CVE7- 3F 
LM=19
355.00000 680.00000
598.00000 686.00000
749.00000 688.00000
1094.00000 650.00000
1189.00000 595.00000
1212.00000 570.00000
1018.00000 456.00000
947.00000 491.00000
780.00000 407.00000
816.00000 333.00000
693.00000 567.00000
671.00000 594.00000
474.00000 612.00000
457.00000 581.00000
461.00000 545.00000
445.00000 546.00000
420.00000 507.00000
377.00000 621.00000
383.00000 683.00000
IMAGE=CV E lab 1-3 M .jpg
ID=CVE7- 3M 
LM=19
397.00000 641.00000
610.00000 647.00000
750.00000 644.00000
1068.00000 606.00000
1161.00000 545.00000
1176.00000 530.00000
1009.00000 418.00000
929.00000 447.00000
782.00000 367.00000
819.00000 300.00000
692.00000 525.00000
680.00000 548.00000
505.00000 579.00000
488.00000 550.00000
488.00000 523.00000
471.00000 523.00000
449.00000 486.00000
414.00000 589.00000
426.00000 645.00000
IMAGE=CV E lab 1-30 F .jpg
ID=CVE7-30F 
LM=19
434.00000 658.00000
645.00000 663.00000
768.00000 665.00000
1054.00000 631.00000
1142.00000 582.00000
1159.00000 563.00000
1004.00000 460.00000
930.00000 488.00000
789.00000 412.00000
826.00000 351.00000
712.00000 552.00000
694.00000 573.00000
543.00000 597.00000
524.00000 568.00000
524.00000 538.00000
506.00000 538.00000
486.00000 506.00000
450.00000 606.00000
464.00000 660.00000
IMAGE=CV E lab 1-30 M .jpg
ID=CVE7-30M 
LM=19
350.00000 672.00000
558.00000 676.00000
694.00000 677.00000
1020.00000 645.00000
1124.00000 585.00000
1138.00000 572.00000
961.00000 453.00000
884.00000 483.00000
748.00000 401.00000
782.00000 331.00000
640.00000 554.00000
623.00000 582.00000
458.00000 608.00000
441.00000 580.00000
444.00000 550.00000
426.00000 549.00000
402.00000 514.00000
373.00000 619.00000
376.00000 673.00000
IMAGE=CV E lab 1-31 F .jpg
ID=CVE7-31F 
LM=19
364.00000 681.00000
576.00000 688.00000
704.00000 685.00000
1026.00000 658.00000
1114.00000 608.00000
1132.00000 591.00000
970.00000 470.00000
883.00000 501.00000
735.00000 416.00000
773.00000 357.00000
657.00000 567.00000
644.00000 595.00000
473.00000 620.00000
457.00000 586.00000
456.00000 556.00000
440.00000 554.00000
416.00000 521.00000
383.00000 627.00000
389.00000 686.00000
IMAGE=CV E lab 1-31 M .jpg
ID=CVE7-31M 
LM=19
401.00000 674.00000
615.00000 683.00000
748.00000 681.00000
1058.00000 648.00000
1166.00000 577.00000
1182.00000 555.00000
1018.00000 449.00000
946.00000 482.00000
797.00000 399.00000
835.00000 337.00000
715.00000 555.00000
694.00000 582.00000
516.00000 614.00000
500.00000 583.00000
501.00000 554.00000
483.00000 554.00000
458.00000 521.00000
424.00000 625.00000
426.00000 678.00000
IMAGE=CV E lab 1-32 F .jpg
ID=CVE7-32F 
LM=19
395.00000 658.00000
600.00000 667.00000
739.00000 667.00000
1035.00000 638.00000
1131.00000 583.00000
1149.00000 565.00000
972.00000 449.00000
897.00000 482.00000
748.00000 410.00000
789.00000 342.00000
674.00000 554.00000
655.00000 577.00000
497.00000 602.00000
484.00000 569.00000
483.00000 540.00000
464.00000 540.00000
445.00000 510.00000
411.00000 608.00000
419.00000 661.00000
IMAGE=CV E lab 1-32 M .jpg
ID=CVE7-32M 
LM=19
359.00000 654.00000
562.00000 662.00000
693.00000 661.00000
1006.00000 629.00000
1101.00000 575.00000
1118.00000 562.00000
960.00000 447.00000
881.00000 474.00000
741.00000 392.00000
780.00000 332.00000
652.00000 545.00000
634.00000 569.00000
461.00000 596.00000
446.00000 570.00000
452.00000 540.00000
437.00000 541.00000
410.00000 507.00000
377.00000 601.00000
386.00000 659.00000
IMAGE=CV E lab 1-33 F .jpg
ID=CVE7-33F 
LM=19
390.00000 657.00000
586.00000 663.00000
710.00000 663.00000
1007.00000 642.00000
1105.00000 596.00000
1123.00000 578.00000
963.00000 454.00000
883.00000 481.00000
742.00000 400.00000
776.00000 346.00000
662.00000 544.00000
647.00000 571.00000
494.00000 597.00000
476.00000 563.00000
476.00000 536.00000
461.00000 535.00000
438.00000 502.00000
411.00000 605.00000
413.00000 658.00000
IMAGE=CV E lab 1-33 M .jpg
ID=CVE7-33M 
LM=19
353.00000 643.00000
596.00000 654.00000
760.00000 654.00000
1135.00000 595.00000
1221.00000 534.00000
1235.00000 517.00000
1051.00000 407.00000
973.00000 444.00000
803.00000 350.00000
842.00000 279.00000
720.00000 525.00000
698.00000 552.00000
479.00000 575.00000
463.00000 541.00000
462.00000 511.00000
445.00000 513.00000
420.00000 475.00000
377.00000 586.00000
386.00000 645.00000
IMAGE=CV E lab 1-34 F .jpg
ID=CVE7-34F 
LM=19
442.00000 687.00000
642.00000 690.00000
782.00000 689.00000
1070.00000 648.00000
1159.00000 589.00000
1178.00000 572.00000
1001.00000 462.00000
932.00000 492.00000
777.00000 423.00000
818.00000 353.00000
705.00000 571.00000
688.00000 598.00000
541.00000 626.00000
525.00000 595.00000
524.00000 563.00000
506.00000 563.00000
482.00000 531.00000
459.00000 634.00000
465.00000 688.00000
IMAGE=CV E lab 1-34 M .jpg
ID=CVE7-34M 
LM=19
362.00000 681.00000
598.00000 695.00000
761.00000 692.00000
1109.00000 636.00000
1197.00000 576.00000
1211.00000 558.00000
1024.00000 442.00000
963.00000 474.00000
794.00000 387.00000
839.00000 319.00000
712.00000 560.00000
691.00000 589.00000
487.00000 617.00000
467.00000 584.00000
465.00000 549.00000
449.00000 552.00000
421.00000 516.00000
388.00000 626.00000
389.00000 685.00000
IMAGE=CV E lab 1-35 F .jpg
ID=CVE7-35F 
LM=19
389.00000 639.00000
581.00000 645.00000
703.00000 642.00000
992.00000 611.00000
1081.00000 566.00000
1095.00000 553.00000
941.00000 443.00000
875.00000 468.00000
736.00000 396.00000
772.00000 340.00000
656.00000 536.00000
638.00000 558.00000
492.00000 582.00000
476.00000 552.00000
477.00000 527.00000
460.00000 524.00000
439.00000 492.00000
407.00000 590.00000
415.00000 642.00000
IMAGE=CV E lab 1-35 M .jpg
ID=CVE7-35M 
LM=19
305.00000 718.00000
556.00000 726.00000
716.00000 724.00000
1108.00000 685.00000
1208.00000 617.00000
1231.00000 587.00000
1030.00000 480.00000
951.00000 514.00000
783.00000 410.00000
831.00000 340.00000
673.00000 596.00000
651.00000 622.00000
439.00000 649.00000
418.00000 615.00000
416.00000 580.00000
398.00000 582.00000
375.00000 547.00000
332.00000 659.00000
338.00000 721.00000
IMAGE=CV E lab 1-36 F .jpg
ID=CVE7-36F 
LM=19
411.00000 644.00000
601.00000 651.00000
713.00000 645.00000
1000.00000 622.00000
1088.00000 571.00000
1100.00000 560.00000
952.00000 447.00000
882.00000 470.00000
747.00000 400.00000
778.00000 344.00000
669.00000 537.00000
651.00000 560.00000
512.00000 586.00000
496.00000 557.00000
501.00000 530.00000
482.00000 531.00000
461.00000 495.00000
435.00000 595.00000
434.00000 649.00000
IMAGE=CV E lab 1-36 M .jpg
ID=CVE7-36M 
LM=19
369.00000 698.00000
607.00000 712.00000
770.00000 704.00000
1125.00000 641.00000
1210.00000 570.00000
1223.00000 550.00000
1039.00000 450.00000
961.00000 488.00000
792.00000 401.00000
832.00000 328.00000
715.00000 569.00000
691.00000 603.00000
489.00000 632.00000
472.00000 600.00000
470.00000 567.00000
452.00000 568.00000
429.00000 530.00000
395.00000 640.00000
398.00000 701.00000
IMAGE=CV E lab 1-37 F .jpg
ID=CVE7-37F 
LM=19
381.00000 640.00000
581.00000 648.00000
704.00000 647.00000
990.00000 620.00000
1082.00000 573.00000
1102.00000 555.00000
943.00000 443.00000
879.00000 467.00000
734.00000 386.00000
769.00000 328.00000
655.00000 537.00000
639.00000 561.00000
482.00000 582.00000
467.00000 550.00000
468.00000 519.00000
450.00000 521.00000
428.00000 487.00000
396.00000 589.00000
407.00000 645.00000
IMAGE=CV E lab 1-37 M .jpg
ID=CVE7-37M 
LM=19
341.00000 671.00000
580.00000 684.00000
758.00000 681.00000
1124.00000 619.00000
1217.00000 551.00000
1238.00000 524.00000
1027.00000 419.00000
955.00000 452.00000
788.00000 361.00000
832.00000 285.00000
703.00000 539.00000
678.00000 573.00000
471.00000 600.00000
444.00000 563.00000
448.00000 531.00000
430.00000 534.00000
401.00000 498.00000
363.00000 613.00000
365.00000 673.00000
IMAGE=CV E lab 1-38 F .jpg
ID=CVE7-38F 
LM=19
411.00000 683.00000
643.00000 690.00000
799.00000 685.00000
1135.00000 633.00000
1218.00000 577.00000
1236.00000 555.00000
1047.00000 450.00000
970.00000 491.00000
805.00000 406.00000
847.00000 340.00000
731.00000 564.00000
713.00000 591.00000
530.00000 619.00000
508.00000 584.00000
509.00000 552.00000
493.00000 553.00000
466.00000 519.00000
430.00000 629.00000
439.00000 687.00000
IMAGE=CV E lab 1-38 M .jpg
ID=CVE7-38M 
LM=19
305.00000 659.00000
553.00000 668.00000
730.00000 668.00000
1106.00000 611.00000
1198.00000 540.00000
1216.00000 519.00000
1012.00000 401.00000
935.00000 443.00000
760.00000 351.00000
803.00000 272.00000
680.00000 531.00000
656.00000 563.00000
438.00000 591.00000
416.00000 556.00000
420.00000 522.00000
400.00000 519.00000
374.00000 481.00000
332.00000 600.00000
336.00000 663.00000
IMAGE=CV E lab 1-39 F .jpg
ID=CVE7-39F 
LM=19
337.00000 705.00000
567.00000 711.00000
722.00000 706.00000
1060.00000 661.00000
1157.00000 603.00000
1178.00000 578.00000
980.00000 468.00000
901.00000 506.00000
730.00000 420.00000
774.00000 355.00000
676.00000 580.00000
652.00000 613.00000
460.00000 636.00000
441.00000 599.00000
438.00000 569.00000
420.00000 571.00000
392.00000 535.00000
360.00000 649.00000
367.00000 708.00000
IMAGE=CV E lab 1-39 M .jpg
ID=CVE7-39M 
LM=19
337.00000 709.00000
577.00000 721.00000
739.00000 722.00000
1099.00000 684.00000
1199.00000 618.00000
1217.00000 595.00000
1031.00000 468.00000
953.00000 504.00000
794.00000 396.00000
838.00000 327.00000
688.00000 584.00000
665.00000 616.00000
462.00000 643.00000
444.00000 606.00000
449.00000 573.00000
429.00000 571.00000
400.00000 537.00000
366.00000 649.00000
368.00000 713.00000
IMAGE=CV E lab 1-4 F .jpg
ID=CVE7- 4F 
LM=19
343.00000 712.00000
574.00000 726.00000
731.00000 727.00000
1076.00000 693.00000
1168.00000 642.00000
1190.00000 619.00000
996.00000 497.00000
918.00000 533.00000
751.00000 440.00000
799.00000 365.00000
670.00000 597.00000
647.00000 628.00000
469.00000 650.00000
448.00000 612.00000
450.00000 579.00000
431.00000 580.00000
405.00000 543.00000
370.00000 656.00000
371.00000 717.00000
IMAGE=CV E lab 1-4 M .jpg
ID=CVE7- 4M 
LM=19
351.00000 653.00000
594.00000 662.00000
756.00000 655.00000
1126.00000 603.00000
1224.00000 528.00000
1243.00000 502.00000
1028.00000 398.00000
962.00000 435.00000
791.00000 344.00000
838.00000 269.00000
704.00000 524.00000
678.00000 554.00000
468.00000 586.00000
453.00000 549.00000
458.00000 519.00000
437.00000 520.00000
411.00000 485.00000
379.00000 595.00000
378.00000 657.00000
IMAGE=CV E lab 1-40 F .jpg
ID=CVE7-40F 
LM=19
331.00000 719.00000
578.00000 723.00000
737.00000 723.00000
1118.00000 674.00000
1211.00000 603.00000
1230.00000 579.00000
1026.00000 470.00000
942.00000 512.00000
784.00000 414.00000
827.00000 341.00000
690.00000 592.00000
670.00000 623.00000
459.00000 648.00000
442.00000 616.00000
440.00000 582.00000
421.00000 580.00000
396.00000 546.00000
356.00000 658.00000
358.00000 721.00000
IMAGE=CV E lab 1-41 F .jpg
ID=CVE7-41F 
LM=19
371.00000 676.00000
593.00000 688.00000
741.00000 681.00000
1061.00000 639.00000
1148.00000 588.00000
1173.00000 561.00000
982.00000 457.00000
909.00000 492.00000
750.00000 406.00000
792.00000 344.00000
687.00000 559.00000
662.00000 588.00000
489.00000 613.00000
465.00000 583.00000
465.00000 550.00000
448.00000 551.00000
423.00000 515.00000
394.00000 622.00000
399.00000 680.00000
IMAGE=CV E lab 1-41 M .jpg
ID=CVE7-41M 
LM=19
374.00000 677.00000
610.00000 696.00000
777.00000 691.00000
1135.00000 629.00000
1220.00000 565.00000
1235.00000 550.00000
1052.00000 436.00000
971.00000 473.00000
808.00000 382.00000
852.00000 313.00000
732.00000 553.00000
704.00000 585.00000
495.00000 615.00000
478.00000 581.00000
481.00000 550.00000
461.00000 549.00000
438.00000 513.00000
422.00000 623.00000
402.00000 684.00000
IMAGE=CV E lab 1-42 F .jpg
ID=CVE7-42F 
LM=19
352.00000 668.00000
568.00000 676.00000
717.00000 678.00000
1060.00000 643.00000
1148.00000 586.00000
1167.00000 568.00000
977.00000 455.00000
901.00000 490.00000
740.00000 402.00000
782.00000 331.00000
671.00000 558.00000
650.00000 585.00000
465.00000 608.00000
453.00000 572.00000
454.00000 541.00000
438.00000 541.00000
413.00000 503.00000
376.00000 613.00000
379.00000 673.00000
IMAGE=CV E lab 1-42 M .jpg
ID=CVE7-42M 
LM=19
363.00000 697.00000
597.00000 707.00000
762.00000 702.00000
1120.00000 643.00000
1208.00000 583.00000
1224.00000 565.00000
1033.00000 465.00000
948.00000 500.00000
794.00000 411.00000
838.00000 342.00000
715.00000 575.00000
691.00000 601.00000
485.00000 631.00000
465.00000 599.00000
467.00000 565.00000
449.00000 567.00000
424.00000 532.00000
391.00000 640.00000
391.00000 700.00000
IMAGE=CV E lab 1-43 F .jpg
ID=CVE7-43F 
LM=19
394.00000 647.00000
588.00000 656.00000
728.00000 653.00000
1021.00000 617.00000
1102.00000 565.00000
1121.00000 545.00000
957.00000 439.00000
887.00000 475.00000
739.00000 403.00000
774.00000 342.00000
677.00000 540.00000
658.00000 568.00000
491.00000 593.00000
479.00000 560.00000
478.00000 531.00000
462.00000 531.00000
441.00000 499.00000
418.00000 598.00000
421.00000 653.00000
IMAGE=CV E lab 1-43 M .jpg
ID=CVE7-43M 
LM=19
325.00000 745.00000
565.00000 758.00000
732.00000 756.00000
1102.00000 704.00000
1195.00000 640.00000
1209.00000 623.00000
1017.00000 504.00000
948.00000 539.00000
768.00000 442.00000
810.00000 375.00000
691.00000 618.00000
669.00000 651.00000
457.00000 679.00000
435.00000 646.00000
433.00000 611.00000
418.00000 611.00000
389.00000 573.00000
363.00000 685.00000
358.00000 750.00000
IMAGE=CV E lab 1-44 F .jpg
ID=CVE7-44F 
LM=19
364.00000 646.00000
591.00000 658.00000
740.00000 655.00000
1077.00000 604.00000
1153.00000 551.00000
1171.00000 532.00000
990.00000 432.00000
921.00000 466.00000
756.00000 381.00000
793.00000 319.00000
687.00000 536.00000
666.00000 562.00000
487.00000 584.00000
465.00000 550.00000
463.00000 521.00000
448.00000 518.00000
422.00000 482.00000
387.00000 592.00000
391.00000 650.00000
IMAGE=CV E lab 1-44 M .jpg
ID=CVE7-44M 
LM=19
343.00000 704.00000
580.00000 715.00000
752.00000 717.00000
1096.00000 672.00000
1191.00000 608.00000
1209.00000 582.00000
1023.00000 463.00000
950.00000 500.00000
797.00000 411.00000
836.00000 340.00000
680.00000 582.00000
657.00000 612.00000
465.00000 642.00000
448.00000 606.00000
454.00000 575.00000
436.00000 575.00000
410.00000 536.00000
366.00000 647.00000
369.00000 706.00000
IMAGE=CV E lab 1-45 F .jpg
ID=CVE7-45F 
LM=19
380.00000 688.00000
623.00000 709.00000
780.00000 705.00000
1133.00000 654.00000
1219.00000 597.00000
1237.00000 573.00000
1039.00000 465.00000
960.00000 503.00000
795.00000 407.00000
840.00000 341.00000
730.00000 568.00000
702.00000 603.00000
507.00000 625.00000
487.00000 588.00000
484.00000 550.00000
464.00000 551.00000
435.00000 513.00000
406.00000 630.00000
409.00000 694.00000
IMAGE=CV E lab 1-45 M .jpg
ID=CVE7-45M 
LM=19
355.00000 690.00000
589.00000 697.00000
759.00000 695.00000
1112.00000 650.00000
1204.00000 585.00000
1221.00000 563.00000
1031.00000 450.00000
954.00000 488.00000
784.00000 404.00000
825.00000 327.00000
704.00000 568.00000
684.00000 593.00000
473.00000 625.00000
461.00000 591.00000
457.00000 562.00000
439.00000 560.00000
412.00000 529.00000
374.00000 634.00000
385.00000 691.00000
IMAGE=CV E lab 1-46 F .jpg
ID=CVE7-46F 
LM=19
384.00000 680.00000
610.00000 686.00000
760.00000 683.00000
1088.00000 642.00000
1172.00000 585.00000
1190.00000 563.00000
1009.00000 458.00000
930.00000 495.00000
764.00000 411.00000
799.00000 348.00000
716.00000 566.00000
697.00000 593.00000
502.00000 619.00000
481.00000 582.00000
483.00000 551.00000
463.00000 552.00000
441.00000 518.00000
404.00000 626.00000
414.00000 682.00000
IMAGE=CV E lab 1-46 M .jpg
ID=CVE7-46M
LM=19
342.00000 668.00000
573.00000 679.00000
739.00000 674.00000
1077.00000 619.00000
1165.00000 555.00000
1178.00000 541.00000
1001.00000 435.00000
923.00000 469.00000
767.00000 390.00000
810.00000 317.00000
680.00000 551.00000
662.00000 575.00000
460.00000 605.00000
445.00000 573.00000
448.00000 539.00000
430.00000 536.00000
402.00000 506.00000
365.00000 611.00000
370.00000 670.00000
IMAGE=CV E lab 1-47 F .jpg
ID=CVE7-47F 
LM=19
356.00000 670.00000
589.00000 684.00000
747.00000 682.00000
1077.00000 642.00000
1174.00000 580.00000
1195.00000 554.00000
999.00000 442.00000
924.00000 480.00000
748.00000 393.00000
790.00000 327.00000
703.00000 550.00000
677.00000 584.00000
482.00000 608.00000
462.00000 572.00000
465.00000 538.00000
448.00000 538.00000
417.00000 502.00000
381.00000 616.00000
384.00000 675.00000
IMAGE=CV E lab 1-47 M .jpg
ID=CVE7-47M  
LM=19
398.00000 710.00000
634.00000 719.00000
789.00000 712.00000
1165.00000 655.00000
1256.00000 589.00000
1266.00000 575.00000
1074.00000 459.00000
999.00000 495.00000
835.00000 401.00000
876.00000 330.00000
757.00000 577.00000
734.00000 608.00000
525.00000 639.00000
502.00000 603.00000
502.00000 571.00000
480.00000 572.00000
454.00000 535.00000
418.00000 651.00000
428.00000 713.00000
IMAGE=CV E lab 1-48 F .jpg
ID=CVE7-48F
LM=19
394.00000 661.00000
622.00000 673.00000
784.00000 672.00000
1121.00000 634.00000
1202.00000 577.00000
1221.00000 554.00000
1037.00000 449.00000
957.00000 485.00000
792.00000 397.00000
832.00000 332.00000
726.00000 549.00000
702.00000 576.00000
518.00000 597.00000
497.00000 562.00000
496.00000 531.00000
478.00000 529.00000
453.00000 494.00000
418.00000 604.00000
426.00000 664.00000
IMAGE=CV E lab 1-48 M .jpg
ID=CVE7-48M 
LM=19
330.00000 687.00000
569.00000 697.00000
734.00000 696.00000
1104.00000 649.00000
1200.00000 580.00000
1217.00000 562.00000
1016.00000 438.00000
936.00000 474.00000
773.00000 381.00000
816.00000 304.00000
673.00000 560.00000
650.00000 591.00000
456.00000 621.00000
433.00000 584.00000
433.00000 549.00000
414.00000 549.00000
385.00000 513.00000
350.00000 625.00000
357.00000 689.00000
IMAGE=CV E lab 1-49 F .jpg
ID=CVE7-49F
LM=19
406.00000 660.00000
629.00000 669.00000
779.00000 666.00000
1111.00000 625.00000
1202.00000 564.00000
1223.00000 538.00000
1029.00000 436.00000
954.00000 473.00000
789.00000 392.00000
838.00000 321.00000
726.00000 547.00000
706.00000 577.00000
525.00000 599.00000
505.00000 565.00000
506.00000 534.00000
489.00000 533.00000
466.00000 497.00000
430.00000 606.00000
436.00000 664.00000
IMAGE=CV E lab 1-49 M .jpg
ID=CVE7-49M 
LM=19
295.00000 695.00000
551.00000 709.00000
719.00000 709.00000
1126.00000 657.00000
1221.00000 582.00000
1241.00000 560.00000
1041.00000 439.00000
953.00000 483.00000
784.00000 373.00000
836.00000 295.00000
663.00000 569.00000
639.00000 600.00000
429.00000 627.00000
406.00000 590.00000
404.00000 556.00000
386.00000 556.00000
361.00000 517.00000
325.00000 632.00000
324.00000 700.00000
IMAGE=CV E lab 1-5 F .jpg
ID=CVE7- 5F 
LM=19
331.00000 704.00000
571.00000 720.00000
734.00000 720.00000
1082.00000 686.00000
1180.00000 631.00000
1200.00000 607.00000
1010.00000 486.00000
930.00000 521.00000
759.00000 427.00000
799.00000 356.00000
674.00000 594.00000
646.00000 620.00000
458.00000 643.00000
438.00000 605.00000
441.00000 571.00000
423.00000 574.00000
402.00000 532.00000
358.00000 648.00000
362.00000 711.00000
IMAGE=CV E lab 1-5 M .jpg
ID=CVE7- 5M 
LM=19
377.00000 666.00000
597.00000 675.00000
729.00000 676.00000
1052.00000 634.00000
1152.00000 572.00000
1166.00000 555.00000
999.00000 452.00000
921.00000 478.00000
779.00000 395.00000
815.00000 331.00000
683.00000 552.00000
666.00000 577.00000
492.00000 602.00000
473.00000 570.00000
477.00000 539.00000
458.00000 538.00000
436.00000 506.00000
393.00000 611.00000
404.00000 667.00000
IMAGE=CV E lab 1-50 F .jpg
ID=CVE7-50F
LM=19
416.00000 694.00000
640.00000 704.00000
793.00000 701.00000
1122.00000 652.00000
1208.00000 598.00000
1226.00000 582.00000
1036.00000 470.00000
959.00000 507.00000
799.00000 430.00000
838.00000 362.00000
748.00000 577.00000
723.00000 611.00000
537.00000 634.00000
517.00000 599.00000
516.00000 569.00000
499.00000 571.00000
476.00000 534.00000
442.00000 642.00000
445.00000 699.00000
IMAGE=CV E lab 1-50 M .jpg
ID=CVE7-50M 
LM=19
359.00000 676.00000
584.00000 689.00000
743.00000 688.00000
1082.00000 639.00000
1165.00000 584.00000
1185.00000 561.00000
994.00000 459.00000
914.00000 497.00000
754.00000 412.00000
796.00000 348.00000
685.00000 569.00000
665.00000 594.00000
482.00000 616.00000
461.00000 581.00000
462.00000 551.00000
443.00000 551.00000
420.00000 513.00000
385.00000 623.00000
389.00000 680.00000
IMAGE=CV E lab 1-52 M .jpg
ID=CVE7-52M 
LM=19
300.00000 706.00000
555.00000 721.00000
712.00000 720.00000
1087.00000 688.00000
1186.00000 619.00000
1208.00000 598.00000
1019.00000 472.00000
945.00000 508.00000
772.00000 397.00000
818.00000 318.00000
673.00000 579.00000
648.00000 613.00000
439.00000 640.00000
419.00000 604.00000
418.00000 567.00000
395.00000 570.00000
369.00000 528.00000
327.00000 645.00000
326.00000 710.00000
IMAGE=CV E lab 1-6 F .jpg
ID=CVE7- 6F
LM=19
329.00000 700.00000
572.00000 714.00000
715.00000 711.00000
1059.00000 674.00000
1152.00000 610.00000
1172.00000 590.00000
986.00000 472.00000
917.00000 506.00000
744.00000 409.00000
788.00000 339.00000
691.00000 575.00000
665.00000 608.00000
469.00000 629.00000
448.00000 592.00000
446.00000 554.00000
428.00000 556.00000
396.00000 514.00000
354.00000 639.00000
359.00000 704.00000
IMAGE=CV E lab 1-6 M .jpg
ID=CVE7- 6M 
LM=19
325.00000 680.00000
565.00000 692.00000
718.00000 694.00000
1087.00000 655.00000
1182.00000 586.00000
1202.00000 558.00000
1019.00000 451.00000
939.00000 488.00000
790.00000 381.00000
839.00000 312.00000
672.00000 562.00000
647.00000 592.00000
450.00000 616.00000
430.00000 583.00000
432.00000 549.00000
413.00000 549.00000
388.00000 513.00000
351.00000 625.00000
351.00000 685.00000
IMAGE=CV E lab 1-7 F .jpg
ID=CVE7- 7F 
LM=19
345.00000 694.00000
577.00000 705.00000
743.00000 702.00000
1088.00000 665.00000
1188.00000 606.00000
1209.00000 583.00000
1007.00000 469.00000
926.00000 502.00000
760.00000 411.00000
797.00000 342.00000
692.00000 575.00000
665.00000 606.00000
475.00000 629.00000
455.00000 591.00000
456.00000 559.00000
437.00000 558.00000
410.00000 519.00000
374.00000 637.00000
377.00000 696.00000
IMAGE=CV E lab 1-7 M .jpg
ID=CVE7- 7M 
LM=19
318.00000 711.00000
570.00000 723.00000
744.00000 718.00000
1120.00000 670.00000
1227.00000 599.00000
1251.00000 575.00000
1048.00000 455.00000
964.00000 489.00000
790.00000 381.00000
832.00000 302.00000
691.00000 573.00000
667.00000 603.00000
453.00000 637.00000
433.00000 597.00000
430.00000 559.00000
411.00000 562.00000
380.00000 522.00000
342.00000 649.00000
345.00000 715.00000
IMAGE=CV E lab 1-8 F .jpg
ID=CVE7- 8F 
LM=19
355.00000 688.00000
594.00000 704.00000
746.00000 704.00000
1092.00000 670.00000
1193.00000 608.00000
1211.00000 587.00000
1018.00000 470.00000
940.00000 506.00000
772.00000 416.00000
815.00000 348.00000
702.00000 578.00000
678.00000 605.00000
488.00000 627.00000
463.00000 592.00000
463.00000 558.00000
445.00000 555.00000
417.00000 516.00000
381.00000 634.00000
384.00000 694.00000
IMAGE=CV E lab 1-8 M .jpg
ID=CVE7- 8M 
LM=19
318.00000 700.00000
583.00000 711.00000
753.00000 709.00000
1139.00000 662.00000
1238.00000 586.00000
1258.00000 561.00000
1048.00000 443.00000
971.00000 480.00000
803.00000 386.00000
844.00000 300.00000
709.00000 572.00000
684.00000 603.00000
459.00000 632.00000
437.00000 592.00000
438.00000 556.00000
415.00000 556.00000
390.00000 520.00000
343.00000 638.00000
348.00000 703.00000
IMAGE=CV E lab 1-9 F .jpg
ID=CVE7- 9F 
LM=19
369.00000 719.00000
599.00000 726.00000
752.00000 726.00000
1094.00000 686.00000
1188.00000 624.00000
1210.00000 600.00000
1019.00000 490.00000
945.00000 528.00000
779.00000 439.00000
818.00000 367.00000
711.00000 598.00000
687.00000 626.00000
496.00000 652.00000
477.00000 617.00000
478.00000 583.00000
457.00000 582.00000
430.00000 545.00000
393.00000 660.00000
399.00000 722.00000
IMAGE=CV E lab 1-9 M .jpg
ID=CVE7- 9M 
LM=19
338.00000 672.00000
542.00000 689.00000
681.00000 689.00000
1006.00000 649.00000
1088.00000 581.00000
1102.00000 558.00000
947.00000 480.00000
876.00000 510.00000
736.00000 420.00000
773.00000 357.00000
646.00000 569.00000
628.00000 596.00000
453.00000 614.00000
439.00000 582.00000
441.00000 556.00000
427.00000 553.00000
411.00000 524.00000
366.00000 618.00000
364.00000 678.00000
IMAGE=CVE2Field10F.jpg
ID=CVE5-10F 
LM=19
324.00000 703.00000
558.00000 711.00000
716.00000 707.00000
1063.00000 654.00000
1153.00000 573.00000
1164.00000 550.00000
989.00000 468.00000
915.00000 508.00000
768.00000 410.00000
801.00000 339.00000
678.00000 587.00000
656.00000 611.00000
449.00000 640.00000
429.00000 609.00000
435.00000 584.00000
418.00000 579.00000
398.00000 544.00000
354.00000 652.00000
353.00000 709.00000
IMAGE=CVE2Field11F.jpg
ID=CVE5-11F 
LM=19
333.00000 662.00000
573.00000 666.00000
721.00000 665.00000
1083.00000 615.00000
1178.00000 545.00000
1191.00000 521.00000
1000.00000 425.00000
924.00000 459.00000
773.00000 374.00000
807.00000 295.00000
681.00000 540.00000
658.00000 570.00000
460.00000 599.00000
442.00000 567.00000
445.00000 535.00000
425.00000 533.00000
404.00000 498.00000
359.00000 606.00000
357.00000 663.00000
IMAGE=CVE2Field12F.jpg
ID=CVE5-12F 
LM=19
370.00000 717.00000
617.00000 727.00000
777.00000 726.00000
1139.00000 687.00000
1243.00000 603.00000
1264.00000 574.00000
1049.00000 475.00000
967.00000 516.00000
823.00000 425.00000
870.00000 345.00000
747.00000 587.00000
730.00000 623.00000
505.00000 648.00000
481.00000 616.00000
487.00000 584.00000
465.00000 579.00000
441.00000 546.00000
396.00000 656.00000
394.00000 719.00000
IMAGE=CVE2Field13F.jpg
ID=CVE5-13F 
LM=19
329.00000 644.00000
565.00000 655.00000
723.00000 659.00000
1081.00000 609.00000
1176.00000 535.00000
1192.00000 511.00000
1006.00000 420.00000
933.00000 450.00000
776.00000 361.00000
825.00000 294.00000
686.00000 532.00000
665.00000 560.00000
461.00000 582.00000
442.00000 550.00000
442.00000 519.00000
422.00000 518.00000
402.00000 482.00000
350.00000 590.00000
357.00000 647.00000
IMAGE=CVE2Field14F.jpg
ID=CVE5-14F 
LM=19
396.00000 668.00000
593.00000 678.00000
740.00000 678.00000
1040.00000 638.00000
1131.00000 571.00000
1142.00000 550.00000
974.00000 474.00000
912.00000 506.00000
787.00000 426.00000
822.00000 365.00000
691.00000 574.00000
675.00000 595.00000
511.00000 615.00000
492.00000 591.00000
494.00000 562.00000
478.00000 563.00000
461.00000 528.00000
421.00000 619.00000
419.00000 673.00000
IMAGE=CVE2Field15F.jpg
ID=CVE5-15F 
LM=19
332.00000 635.00000
562.00000 647.00000
726.00000 648.00000
1063.00000 611.00000
1165.00000 549.00000
1182.00000 528.00000
997.00000 415.00000
918.00000 446.00000
740.00000 358.00000
781.00000 288.00000
681.00000 511.00000
663.00000 551.00000
458.00000 575.00000
434.00000 537.00000
440.00000 505.00000
422.00000 504.00000
398.00000 464.00000
352.00000 577.00000
358.00000 637.00000
IMAGE=CVE2Field16M.jpg
ID=CVE5-16M 
LM=19
340.00000 627.00000
581.00000 638.00000
746.00000 634.00000
1117.00000 575.00000
1213.00000 500.00000
1232.00000 478.00000
1036.00000 389.00000
959.00000 426.00000
799.00000 336.00000
840.00000 267.00000
701.00000 497.00000
673.00000 532.00000
465.00000 559.00000
450.00000 523.00000
456.00000 495.00000
440.00000 494.00000
414.00000 459.00000
370.00000 567.00000
371.00000 632.00000
IMAGE=CVE2Field17F.jpg
ID=CVE5-17F 
LM=19
316.00000 699.00000
577.00000 713.00000
738.00000 715.00000
1104.00000 666.00000
1203.00000 585.00000
1220.00000 560.00000
1014.00000 460.00000
925.00000 496.00000
777.00000 408.00000
820.00000 322.00000
693.00000 577.00000
673.00000 611.00000
460.00000 635.00000
436.00000 604.00000
442.00000 571.00000
426.00000 571.00000
405.00000 530.00000
348.00000 640.00000
349.00000 705.00000
IMAGE=CVE2Field18F.jpg
ID=CVE5-18F 
LM=19
332.00000 674.00000
571.00000 690.00000
728.00000 693.00000
1100.00000 637.00000
1182.00000 573.00000
1203.00000 550.00000
1019.00000 460.00000
932.00000 500.00000
786.00000 395.00000
827.00000 332.00000
689.00000 565.00000
667.00000 595.00000
459.00000 614.00000
442.00000 578.00000
448.00000 552.00000
431.00000 552.00000
410.00000 509.00000
360.00000 618.00000
358.00000 679.00000
IMAGE=CVE2Field19F.jpg
ID=CVE5-19F 
LM=19
391.00000 664.00000
587.00000 674.00000
720.00000 674.00000
1025.00000 636.00000
1112.00000 574.00000
1125.00000 558.00000
953.00000 475.00000
887.00000 505.00000
767.00000 426.00000
809.00000 367.00000
688.00000 565.00000
668.00000 591.00000
498.00000 613.00000
481.00000 586.00000
483.00000 560.00000
469.00000 559.00000
451.00000 530.00000
413.00000 618.00000
411.00000 668.00000
IMAGE=CVE7-1F.jpg
ID=CVE5- 1F 
LM=19
314.00000 665.00000
541.00000 674.00000
707.00000 679.00000
1078.00000 634.00000
1184.00000 553.00000
1197.00000 528.00000
1005.00000 427.00000
931.00000 463.00000
772.00000 371.00000
812.00000 286.00000
691.00000 544.00000
670.00000 575.00000
447.00000 603.00000
425.00000 567.00000
433.00000 538.00000
416.00000 538.00000
394.00000 493.00000
344.00000 608.00000
342.00000 670.00000
IMAGE=CVE2Field20F.jpg
ID=CVE5-20F 
LM=19
340.00000 678.00000
557.00000 696.00000
701.00000 701.00000
1042.00000 660.00000
1138.00000 591.00000
1155.00000 569.00000
972.00000 478.00000
891.00000 514.00000
740.00000 426.00000
790.00000 352.00000
666.00000 577.00000
649.00000 611.00000
455.00000 627.00000
438.00000 597.00000
442.00000 570.00000
425.00000 568.00000
406.00000 537.00000
364.00000 630.00000
365.00000 683.00000
IMAGE=CVE2Field2F.jpg
ID=CVE5- 2F 
LM=19
391.00000 649.00000
603.00000 665.00000
745.00000 667.00000
1060.00000 622.00000
1135.00000 542.00000
1143.00000 519.00000
1000.00000 475.00000
938.00000 508.00000
809.00000 415.00000
846.00000 356.00000
712.00000 555.00000
694.00000 580.00000
510.00000 592.00000
486.00000 567.00000
489.00000 537.00000
472.00000 537.00000
455.00000 506.00000
411.00000 598.00000
414.00000 652.00000
IMAGE=CVE2Field3F.jpg
ID=CVE5- 3F 
LM=19
331.00000 666.00000
537.00000 679.00000
667.00000 678.00000
975.00000 644.00000
1073.00000 576.00000
1082.00000 558.00000
911.00000 465.00000
844.00000 498.00000
713.00000 416.00000
751.00000 357.00000
657.00000 559.00000
637.00000 590.00000
439.00000 609.00000
424.00000 580.00000
430.00000 554.00000
417.00000 554.00000
392.00000 522.00000
352.00000 614.00000
354.00000 670.00000
IMAGE=CVE2Field4F.jpg
ID=CVE5- 4F 
LM=19
268.00000 688.00000
546.00000 704.00000
718.00000 704.00000
1116.00000 644.00000
1216.00000 557.00000
1231.00000 522.00000
1027.00000 432.00000
937.00000 479.00000
778.00000 376.00000
840.00000 285.00000
704.00000 554.00000
681.00000 594.00000
420.00000 615.00000
398.00000 574.00000
405.00000 541.00000
386.00000 539.00000
358.00000 496.00000
298.00000 623.00000
298.00000 690.00000
IMAGE=CVE2Field5F.jpg
ID=CVE5- 5F 
LM=19
361.00000 655.00000
586.00000 669.00000
725.00000 668.00000
1040.00000 636.00000
1130.00000 577.00000
1143.00000 547.00000
969.00000 467.00000
899.00000 495.00000
737.00000 406.00000
776.00000 343.00000
705.00000 549.00000
681.00000 580.00000
481.00000 595.00000
463.00000 559.00000
465.00000 528.00000
449.00000 528.00000
423.00000 490.00000
380.00000 595.00000
388.00000 658.00000
IMAGE=CVE2Field6M.jpg
ID=CVE5- 6M 
LM=19
366.00000 672.00000
602.00000 692.00000
751.00000 691.00000
1111.00000 645.00000
1209.00000 562.00000
1219.00000 541.00000
1028.00000 450.00000
958.00000 485.00000
807.00000 388.00000
868.00000 313.00000
713.00000 553.00000
686.00000 585.00000
486.00000 608.00000
468.00000 573.00000
478.00000 543.00000
456.00000 542.00000
433.00000 508.00000
391.00000 614.00000
394.00000 676.00000
IMAGE=CVE2Field7F.jpg
ID=CVE5- 7F 
LM=19
403.00000 647.00000
599.00000 660.00000
733.00000 660.00000
1022.00000 632.00000
1110.00000 566.00000
1125.00000 547.00000
962.00000 459.00000
908.00000 483.00000
769.00000 408.00000
802.00000 349.00000
707.00000 547.00000
691.00000 575.00000
511.00000 591.00000
497.00000 562.00000
498.00000 537.00000
482.00000 537.00000
461.00000 507.00000
429.00000 598.00000
427.00000 650.00000
IMAGE=CVE7-8F.jpg
ID=CVE5- 8F 
LM=19
372.00000 705.00000
589.00000 717.00000
731.00000 716.00000
1089.00000 683.00000
1195.00000 617.00000
1208.00000 599.00000
1022.00000 494.00000
947.00000 533.00000
803.00000 435.00000
841.00000 367.00000
726.00000 594.00000
705.00000 622.00000
492.00000 647.00000
473.00000 613.00000
477.00000 587.00000
461.00000 586.00000
440.00000 550.00000
395.00000 651.00000
402.00000 711.00000
IMAGE=CVE2Field9F.jpg
ID=CVE5- 9F 
LM=19
382.00000 668.00000
603.00000 678.00000
743.00000 677.00000
1072.00000 637.00000
1162.00000 571.00000
1177.00000 547.00000
998.00000 458.00000
924.00000 494.00000
799.00000 414.00000
842.00000 343.00000
703.00000 562.00000
686.00000 591.00000
507.00000 609.00000
484.00000 578.00000
487.00000 545.00000
473.00000 546.00000
453.00000 512.00000
409.00000 615.00000
412.00000 671.00000
IMAGE=CVEField10F.jpg
ID=CVE4-10F 
LM=19
363.00000 644.00000
570.00000 660.00000
723.00000 664.00000
1039.00000 620.00000
1123.00000 552.00000
1136.00000 530.00000
960.00000 448.00000
886.00000 486.00000
760.00000 401.00000
801.00000 340.00000
678.00000 551.00000
660.00000 571.00000
478.00000 586.00000
458.00000 558.00000
459.00000 533.00000
443.00000 532.00000
425.00000 498.00000
388.00000 590.00000
390.00000 646.00000
IMAGE=CVEField11F.jpg
ID=CVE4-11F 
LM=19
390.00000 682.00000
596.00000 694.00000
732.00000 697.00000
1050.00000 649.00000
1135.00000 579.00000
1147.00000 561.00000
982.00000 473.00000
916.00000 506.00000
778.00000 421.00000
815.00000 358.00000
689.00000 576.00000
669.00000 603.00000
503.00000 626.00000
484.00000 595.00000
487.00000 568.00000
468.00000 566.00000
444.00000 535.00000
413.00000 630.00000
415.00000 684.00000
IMAGE=CVEField12F.jpg
ID=CVE4-12F 
LM=19
334.00000 694.00000
580.00000 700.00000
749.00000 699.00000
1125.00000 674.00000
1233.00000 600.00000
1251.00000 573.00000
1050.00000 454.00000
961.00000 498.00000
807.00000 391.00000
856.00000 311.00000
728.00000 568.00000
705.00000 595.00000
478.00000 620.00000
454.00000 586.00000
457.00000 554.00000
437.00000 550.00000
412.00000 511.00000
366.00000 629.00000
362.00000 699.00000
IMAGE=CVEField13F.jpg
ID=CVE4-13F 
LM=19
380.00000 674.00000
593.00000 689.00000
738.00000 687.00000
1048.00000 644.00000
1136.00000 570.00000
1147.00000 550.00000
983.00000 457.00000
914.00000 491.00000
782.00000 417.00000
819.00000 347.00000
696.00000 568.00000
674.00000 597.00000
495.00000 619.00000
477.00000 592.00000
481.00000 563.00000
465.00000 559.00000
443.00000 527.00000
400.00000 624.00000
406.00000 680.00000
IMAGE=CVEField14F.jpg
ID=CVE4-14F 
LM=19
351.00000 677.00000
592.00000 686.00000
764.00000 683.00000
1128.00000 637.00000
1229.00000 560.00000
1247.00000 534.00000
1045.00000 433.00000
963.00000 471.00000
799.00000 366.00000
848.00000 289.00000
715.00000 550.00000
699.00000 580.00000
482.00000 607.00000
461.00000 571.00000
463.00000 539.00000
444.00000 539.00000
418.00000 503.00000
375.00000 613.00000
376.00000 680.00000
IMAGE=CVEField15M.jpg
ID=CVE4-15M 
LM=19
345.00000 691.00000
571.00000 701.00000
720.00000 696.00000
1047.00000 672.00000
1144.00000 614.00000
1164.00000 593.00000
975.00000 480.00000
905.00000 509.00000
736.00000 417.00000
774.00000 355.00000
678.00000 572.00000
655.00000 598.00000
469.00000 622.00000
452.00000 590.00000
452.00000 561.00000
436.00000 560.00000
413.00000 523.00000
367.00000 638.00000
375.00000 694.00000
IMAGE=CVEField16M.jpg
ID=CVE4-16M 
LM=19
366.00000 670.00000
590.00000 683.00000
728.00000 675.00000
1049.00000 642.00000
1148.00000 579.00000
1171.00000 552.00000
981.00000 447.00000
896.00000 487.00000
744.00000 407.00000
773.00000 343.00000
691.00000 555.00000
670.00000 584.00000
482.00000 610.00000
462.00000 574.00000
465.00000 549.00000
450.00000 549.00000
428.00000 510.00000
389.00000 618.00000
393.00000 674.00000
IMAGE=CVEField17M.jpg
ID=CVE4-17M 
LM=19
385.00000 674.00000
561.00000 682.00000
696.00000 681.00000
974.00000 636.00000
1049.00000 579.00000
1059.00000 562.00000
904.00000 485.00000
844.00000 520.00000
715.00000 454.00000
750.00000 397.00000
654.00000 586.00000
633.00000 608.00000
488.00000 629.00000
470.00000 602.00000
471.00000 578.00000
456.00000 583.00000
439.00000 548.00000
409.00000 636.00000
408.00000 678.00000
IMAGE=CVEField18M.jpg
ID=CVE4-18M 
LM=19
425.00000 670.00000
616.00000 676.00000
744.00000 671.00000
1025.00000 626.00000
1104.00000 567.00000
1121.00000 545.00000
953.00000 465.00000
889.00000 496.00000
751.00000 431.00000
785.00000 372.00000
697.00000 564.00000
682.00000 588.00000
531.00000 611.00000
509.00000 586.00000
509.00000 559.00000
496.00000 561.00000
475.00000 527.00000
447.00000 622.00000
450.00000 672.00000
IMAGE=CVEField19M.jpg
ID=CVE4-19M 
LM=19
344.00000 625.00000
559.00000 642.00000
703.00000 644.00000
1033.00000 603.00000
1113.00000 533.00000
1126.00000 512.00000
961.00000 439.00000
901.00000 466.00000
760.00000 377.00000
801.00000 313.00000
678.00000 531.00000
653.00000 556.00000
467.00000 565.00000
446.00000 535.00000
450.00000 508.00000
435.00000 506.00000
416.00000 472.00000
368.00000 571.00000
366.00000 629.00000
IMAGE=CVEField1F.jpg
ID=CVE4- 1F 
LM=19
434.00000 658.00000
635.00000 665.00000
765.00000 663.00000
1061.00000 617.00000
1138.00000 555.00000
1152.00000 533.00000
979.00000 462.00000
916.00000 495.00000
784.00000 428.00000
819.00000 371.00000
725.00000 560.00000
705.00000 585.00000
542.00000 605.00000
524.00000 577.00000
526.00000 554.00000
510.00000 553.00000
490.00000 517.00000
457.00000 612.00000
457.00000 664.00000
IMAGE=CVEField20M.jpg
ID=CVE4-20M 
LM=19
336.00000 686.00000
582.00000 702.00000
739.00000 699.00000
1103.00000 646.00000
1201.00000 569.00000
1220.00000 540.00000
1025.00000 442.00000
944.00000 486.00000
800.00000 384.00000
844.00000 318.00000
708.00000 561.00000
684.00000 592.00000
463.00000 618.00000
445.00000 584.00000
449.00000 553.00000
431.00000 552.00000
408.00000 512.00000
359.00000 626.00000
363.00000 688.00000
IMAGE=CVEField2F.jpg
ID=CVE4- 2F 
LM=19
328.00000 696.00000
574.00000 704.00000
738.00000 703.00000
1095.00000 653.00000
1195.00000 577.00000
1210.00000 554.00000
1015.00000 459.00000
937.00000 495.00000
781.00000 405.00000
824.00000 327.00000
667.00000 575.00000
646.00000 604.00000
447.00000 629.00000
430.00000 597.00000
435.00000 567.00000
420.00000 570.00000
395.00000 528.00000
353.00000 641.00000
357.00000 699.00000
IMAGE=CVEField3F.jpg
ID=CVE4- 3F 
LM=19
290.00000 672.00000
522.00000 686.00000
690.00000 684.00000
1060.00000 630.00000
1161.00000 553.00000
1178.00000 529.00000
971.00000 440.00000
896.00000 480.00000
732.00000 383.00000
776.00000 304.00000
666.00000 553.00000
648.00000 583.00000
419.00000 602.00000
396.00000 566.00000
404.00000 534.00000
384.00000 533.00000
365.00000 497.00000
299.00000 609.00000
314.00000 675.00000
IMAGE=CVEField4F.jpg
ID=CVE4- 4F 
LM=19
353.00000 667.00000
573.00000 680.00000
726.00000 681.00000
1077.00000 630.00000
1165.00000 555.00000
1179.00000 532.00000
1008.00000 459.00000
943.00000 498.00000
784.00000 407.00000
820.00000 331.00000
712.00000 566.00000
689.00000 591.00000
478.00000 604.00000
459.00000 572.00000
469.00000 555.00000
449.00000 554.00000
426.00000 516.00000
377.00000 608.00000
380.00000 670.00000
IMAGE=CVEField5F.jpg
ID=CVE4- 5F 
LM=19
323.00000 665.00000
569.00000 679.00000
729.00000 680.00000
1098.00000 645.00000
1202.00000 571.00000
1220.00000 543.00000
1022.00000 451.00000
945.00000 481.00000
793.00000 379.00000
846.00000 304.00000
698.00000 552.00000
674.00000 582.00000
462.00000 601.00000
438.00000 566.00000
448.00000 536.00000
428.00000 534.00000
404.00000 493.00000
353.00000 606.00000
350.00000 667.00000
IMAGE=CVEField6F.jpg
ID=CVE4- 6F 
LM=19
318.00000 650.00000
551.00000 663.00000
716.00000 665.00000
1079.00000 613.00000
1178.00000 537.00000
1190.00000 519.00000
995.00000 424.00000
916.00000 459.00000
772.00000 374.00000
818.00000 304.00000
668.00000 536.00000
643.00000 564.00000
448.00000 588.00000
424.00000 554.00000
431.00000 524.00000
413.00000 521.00000
394.00000 489.00000
345.00000 592.00000
348.00000 654.00000
IMAGE=CVEField7F.jpg
ID=CVE4- 7F 
LM=19
353.00000 688.00000
576.00000 696.00000
722.00000 691.00000
1070.00000 655.00000
1164.00000 588.00000
1181.00000 569.00000
999.00000 465.00000
927.00000 499.00000
766.00000 405.00000
802.00000 337.00000
711.00000 569.00000
690.00000 597.00000
476.00000 623.00000
458.00000 590.00000
458.00000 560.00000
440.00000 559.00000
416.00000 521.00000
375.00000 634.00000
379.00000 691.00000
IMAGE=CVEField8F.jpg
ID=CVE4- 8F 
LM=19
316.00000 679.00000
559.00000 697.00000
727.00000 697.00000
1110.00000 658.00000
1209.00000 576.00000
1223.00000 549.00000
1039.00000 464.00000
953.00000 504.00000
798.00000 382.00000
842.00000 308.00000
708.00000 564.00000
686.00000 599.00000
460.00000 613.00000
440.00000 571.00000
444.00000 540.00000
422.00000 539.00000
402.00000 502.00000
345.00000 617.00000
340.00000 682.00000
IMAGE=CVEField9F.jpg
ID=CVE4- 9F 
LM=19
337.00000 695.00000
565.00000 707.00000
730.00000 706.00000
1105.00000 658.00000
1204.00000 599.00000
1220.00000 581.00000
1022.00000 460.00000
946.00000 492.00000
775.00000 402.00000
817.00000 332.00000
682.00000 576.00000
667.00000 603.00000
461.00000 632.00000
436.00000 597.00000
436.00000 565.00000
419.00000 567.00000
397.00000 532.00000
361.00000 640.00000
365.00000 700.00000
IMAGE=CVGLab10F.jpg
ID=CVG3-10F 
LM=19
333.00000 679.00000
553.00000 688.00000
709.00000 686.00000
1058.00000 641.00000
1150.00000 584.00000
1166.00000 565.00000
980.00000 456.00000
895.00000 494.00000
726.00000 406.00000
764.00000 340.00000
661.00000 561.00000
641.00000 590.00000
456.00000 614.00000
435.00000 580.00000
437.00000 547.00000
419.00000 548.00000
395.00000 511.00000
355.00000 625.00000
358.00000 682.00000
IMAGE=CVGLab10M.jpg
ID=CVG3-10M 
LM=19
346.00000 696.00000
580.00000 705.00000
741.00000 700.00000
1113.00000 647.00000
1208.00000 584.00000
1228.00000 563.00000
1027.00000 443.00000
954.00000 475.00000
773.00000 385.00000
814.00000 309.00000
700.00000 561.00000
685.00000 595.00000
474.00000 629.00000
448.00000 591.00000
450.00000 559.00000
429.00000 558.00000
400.00000 521.00000
373.00000 634.00000
372.00000 697.00000
IMAGE=CVGLab11F.jpg
ID=CVG3-11F 
LM=19
345.00000 676.00000
573.00000 685.00000
742.00000 681.00000
1062.00000 634.00000
1157.00000 576.00000
1176.00000 555.00000
984.00000 443.00000
909.00000 482.00000
727.00000 398.00000
766.00000 328.00000
681.00000 554.00000
656.00000 586.00000
466.00000 613.00000
443.00000 578.00000
443.00000 544.00000
424.00000 546.00000
398.00000 508.00000
368.00000 621.00000
371.00000 679.00000
IMAGE=CVGLab11M.jpg
ID=CVG3-11M 
LM=19
321.00000 678.00000
547.00000 690.00000
712.00000 687.00000
1093.00000 635.00000
1191.00000 573.00000
1210.00000 554.00000
1017.00000 433.00000
941.00000 466.00000
768.00000 368.00000
810.00000 300.00000
673.00000 548.00000
651.00000 581.00000
450.00000 613.00000
424.00000 576.00000
425.00000 542.00000
407.00000 542.00000
380.00000 508.00000
345.00000 623.00000
348.00000 681.00000
IMAGE=CVGLab12F.jpg
ID=CVG3-12F 
LM=19
361.00000 676.00000
573.00000 687.00000
723.00000 689.00000
1041.00000 646.00000
1139.00000 591.00000
1160.00000 567.00000
965.00000 460.00000
898.00000 493.00000
737.00000 413.00000
772.00000 351.00000
691.00000 563.00000
673.00000 593.00000
477.00000 617.00000
456.00000 583.00000
458.00000 552.00000
439.00000 552.00000
415.00000 517.00000
383.00000 625.00000
387.00000 680.00000
IMAGE=CVGLab12M.jpg
ID=CVG3-12M 
LM=19
355.00000 708.00000
585.00000 724.00000
739.00000 722.00000
1105.00000 677.00000
1199.00000 609.00000
1217.00000 589.00000
1025.00000 470.00000
950.00000 504.00000
770.00000 418.00000
815.00000 343.00000
697.00000 586.00000
680.00000 618.00000
477.00000 646.00000
457.00000 611.00000
454.00000 577.00000
438.00000 581.00000
413.00000 543.00000
382.00000 653.00000
382.00000 712.00000
IMAGE=CVGLab13F.jpg
ID=CVG3-13F 
LM=19
368.00000 677.00000
593.00000 687.00000
754.00000 684.00000
1112.00000 641.00000
1207.00000 586.00000
1227.00000 562.00000
1036.00000 445.00000
956.00000 480.00000
775.00000 400.00000
816.00000 332.00000
720.00000 551.00000
698.00000 588.00000
497.00000 614.00000
476.00000 578.00000
475.00000 546.00000
458.00000 548.00000
429.00000 506.00000
395.00000 620.00000
395.00000 681.00000
IMAGE=CVGLab13M.jpg
ID=CVG3-13M 
LM=19
318.00000 696.00000
556.00000 709.00000
735.00000 709.00000
1111.00000 654.00000
1223.00000 582.00000
1244.00000 555.00000
1030.00000 439.00000
951.00000 480.00000
770.00000 390.00000
815.00000 312.00000
688.00000 570.00000
670.00000 601.00000
447.00000 633.00000
425.00000 594.00000
425.00000 564.00000
407.00000 561.00000
386.00000 525.00000
344.00000 640.00000
345.00000 700.00000
IMAGE=CVGLab14F.jpg
ID=CVG3-14F 
LM=19
381.00000 642.00000
589.00000 647.00000
739.00000 645.00000
1060.00000 601.00000
1151.00000 545.00000
1169.00000 521.00000
975.00000 416.00000
902.00000 450.00000
743.00000 375.00000
778.00000 306.00000
706.00000 523.00000
689.00000 552.00000
495.00000 582.00000
476.00000 550.00000
473.00000 519.00000
458.00000 521.00000
434.00000 485.00000
405.00000 591.00000
407.00000 645.00000
IMAGE=CVGLab14M.jpg
ID=CVG3-14M 
LM=19
359.00000 683.00000
584.00000 698.00000
738.00000 695.00000
1085.00000 644.00000
1182.00000 575.00000
1199.00000 557.00000
1005.00000 441.00000
932.00000 474.00000
777.00000 385.00000
820.00000 315.00000
705.00000 557.00000
684.00000 591.00000
480.00000 621.00000
463.00000 587.00000
463.00000 556.00000
446.00000 555.00000
419.00000 518.00000
383.00000 629.00000
384.00000 687.00000
IMAGE=CVGLab15F.jpg
ID=CVG3-15F 
LM=19
365.00000 701.00000
580.00000 711.00000
735.00000 708.00000
1066.00000 657.00000
1149.00000 598.00000
1167.00000 579.00000
976.00000 475.00000
900.00000 509.00000
730.00000 438.00000
768.00000 371.00000
680.00000 586.00000
663.00000 612.00000
480.00000 640.00000
463.00000 605.00000
458.00000 578.00000
441.00000 578.00000
417.00000 544.00000
387.00000 649.00000
389.00000 705.00000
IMAGE=CVGLab15M.jpg
ID=CVG3-15M 
LM=19
338.00000 694.00000
574.00000 709.00000
742.00000 709.00000
1113.00000 655.00000
1206.00000 594.00000
1223.00000 575.00000
1042.00000 452.00000
965.00000 481.00000
790.00000 386.00000
831.00000 315.00000
691.00000 566.00000
669.00000 598.00000
466.00000 627.00000
442.00000 589.00000
443.00000 557.00000
424.00000 558.00000
397.00000 519.00000
394.00000 631.00000
369.00000 696.00000
IMAGE=CVGLab16F.jpg
ID=CVG3-16F 
LM=19
384.00000 700.00000
595.00000 709.00000
740.00000 706.00000
1059.00000 658.00000
1144.00000 604.00000
1163.00000 582.00000
977.00000 478.00000
907.00000 514.00000
748.00000 437.00000
779.00000 377.00000
699.00000 585.00000
682.00000 616.00000
500.00000 643.00000
477.00000 609.00000
476.00000 578.00000
461.00000 579.00000
433.00000 545.00000
406.00000 652.00000
407.00000 703.00000
IMAGE=CVGLab16M.jpg
ID=CVG3-16M 
LM=19
359.00000 691.00000
572.00000 702.00000
727.00000 702.00000
1085.00000 655.00000
1180.00000 598.00000
1200.00000 577.00000
1021.00000 463.00000
943.00000 495.00000
775.00000 404.00000
820.00000 338.00000
692.00000 567.00000
674.00000 601.00000
475.00000 624.00000
456.00000 592.00000
457.00000 562.00000
440.00000 562.00000
417.00000 529.00000
382.00000 631.00000
384.00000 694.00000
IMAGE=CVGLab17F.jpg
ID=CVG3-17F 
LM=19
355.00000 680.00000
565.00000 689.00000
717.00000 690.00000
1052.00000 644.00000
1139.00000 589.00000
1157.00000 568.00000
960.00000 461.00000
889.00000 494.00000
716.00000 420.00000
756.00000 352.00000
669.00000 565.00000
648.00000 595.00000
466.00000 621.00000
447.00000 588.00000
444.00000 559.00000
428.00000 560.00000
403.00000 525.00000
375.00000 630.00000
379.00000 683.00000
IMAGE=CVGLab17M.jpg
ID=CVG3-17M 
LM=19
316.00000 717.00000
540.00000 728.00000
697.00000 726.00000
1073.00000 673.00000
1176.00000 608.00000
1193.00000 590.00000
990.00000 472.00000
920.00000 503.00000
746.00000 416.00000
785.00000 346.00000
661.00000 588.00000
642.00000 620.00000
440.00000 652.00000
419.00000 613.00000
419.00000 580.00000
401.00000 580.00000
371.00000 545.00000
339.00000 660.00000
348.00000 721.00000
IMAGE=CVGLab18F.jpg
ID=CVG3-18F 
LM=19
374.00000 676.00000
588.00000 683.00000
743.00000 680.00000
1075.00000 631.00000
1159.00000 575.00000
1177.00000 556.00000
992.00000 446.00000
918.00000 482.00000
751.00000 400.00000
792.00000 337.00000
689.00000 554.00000
667.00000 587.00000
486.00000 612.00000
468.00000 578.00000
466.00000 549.00000
445.00000 547.00000
420.00000 513.00000
393.00000 623.00000
398.00000 678.00000
IMAGE=CVGLab18M.jpg
ID=CVG3-18M 
LM=19
327.00000 691.00000
555.00000 709.00000
715.00000 706.00000
1087.00000 656.00000
1177.00000 597.00000
1197.00000 574.00000
1012.00000 449.00000
938.00000 480.00000
755.00000 391.00000
797.00000 319.00000
669.00000 567.00000
650.00000 599.00000
448.00000 627.00000
427.00000 592.00000
424.00000 560.00000
406.00000 563.00000
380.00000 526.00000
355.00000 636.00000
351.00000 694.00000
IMAGE=CVGLab19F.jpg
ID=CVG3-19F 
LM=19
371.00000 652.00000
578.00000 659.00000
720.00000 659.00000
1047.00000 613.00000
1129.00000 559.00000
1148.00000 540.00000
962.00000 432.00000
892.00000 466.00000
725.00000 390.00000
760.00000 328.00000
680.00000 539.00000
662.00000 567.00000
485.00000 593.00000
462.00000 560.00000
459.00000 530.00000
445.00000 532.00000
417.00000 495.00000
393.00000 600.00000
394.00000 654.00000
IMAGE=CVGLab19M.jpg
ID=CVG3-19M 
LM=19
381.00000 662.00000
590.00000 670.00000
718.00000 665.00000
1059.00000 625.00000
1158.00000 565.00000
1177.00000 548.00000
990.00000 430.00000
920.00000 458.00000
778.00000 376.00000
822.00000 311.00000
692.00000 536.00000
677.00000 566.00000
496.00000 600.00000
473.00000 560.00000
474.00000 533.00000
454.00000 533.00000
432.00000 500.00000
402.00000 607.00000
406.00000 664.00000
IMAGE=CVGLab1F.jpg
ID=CVG3- 1F 
LM=19
399.00000 651.00000
602.00000 655.00000
738.00000 648.00000
1050.00000 593.00000
1136.00000 532.00000
1152.00000 514.00000
970.00000 414.00000
896.00000 449.00000
737.00000 393.00000
779.00000 318.00000
691.00000 529.00000
678.00000 557.00000
508.00000 588.00000
489.00000 555.00000
490.00000 527.00000
470.00000 526.00000
447.00000 496.00000
419.00000 600.00000
426.00000 653.00000
IMAGE=CVGLab1M.jpg
ID=CVG3- 1M 
LM=19
336.00000 671.00000
570.00000 683.00000
732.00000 683.00000
1083.00000 636.00000
1177.00000 573.00000
1195.00000 548.00000
996.00000 437.00000
928.00000 472.00000
760.00000 389.00000
810.00000 310.00000
685.00000 553.00000
667.00000 583.00000
460.00000 607.00000
440.00000 572.00000
440.00000 543.00000
422.00000 540.00000
397.00000 506.00000
358.00000 615.00000
366.00000 674.00000
IMAGE=CVGLab20F.jpg
ID=CVG3-20F 
LM=19
383.00000 665.00000
601.00000 678.00000
755.00000 677.00000
1089.00000 636.00000
1175.00000 580.00000
1194.00000 560.00000
999.00000 454.00000
924.00000 485.00000
755.00000 410.00000
796.00000 341.00000
699.00000 558.00000
679.00000 585.00000
499.00000 607.00000
476.00000 572.00000
474.00000 543.00000
459.00000 544.00000
437.00000 509.00000
406.00000 613.00000
408.00000 670.00000
IMAGE=CVGLab20M.jpg
ID=CVG3-20M 
LM=19
344.00000 685.00000
567.00000 700.00000
726.00000 699.00000
1084.00000 652.00000
1182.00000 584.00000
1198.00000 568.00000
1012.00000 451.00000
939.00000 487.00000
762.00000 394.00000
801.00000 324.00000
690.00000 562.00000
672.00000 595.00000
464.00000 620.00000
446.00000 584.00000
448.00000 554.00000
429.00000 554.00000
403.00000 518.00000
369.00000 629.00000
370.00000 687.00000
IMAGE=CVGLab21F.jpg
ID=CVG3-21F 
LM=19
420.00000 693.00000
614.00000 697.00000
732.00000 692.00000
1027.00000 650.00000
1114.00000 595.00000
1130.00000 578.00000
958.00000 480.00000
892.00000 505.00000
747.00000 438.00000
782.00000 380.00000
691.00000 578.00000
682.00000 606.00000
520.00000 634.00000
502.00000 602.00000
499.00000 574.00000
482.00000 574.00000
460.00000 544.00000
438.00000 645.00000
443.00000 694.00000
IMAGE=CVGLab21M.jpg
ID=CVG3-21M 
LM=19
316.00000 681.00000
542.00000 694.00000
700.00000 695.00000
1069.00000 653.00000
1166.00000 591.00000
1180.00000 570.00000
984.00000 457.00000
915.00000 487.00000
747.00000 398.00000
790.00000 326.00000
660.00000 565.00000
642.00000 592.00000
439.00000 617.00000
420.00000 584.00000
419.00000 552.00000
403.00000 552.00000
378.00000 515.00000
342.00000 625.00000
343.00000 682.00000
IMAGE=CVGLab22F.jpg
ID=CVG3-22F 
LM=19
371.00000 671.00000
579.00000 681.00000
707.00000 679.00000
1043.00000 642.00000
1133.00000 591.00000
1151.00000 573.00000
958.00000 457.00000
882.00000 484.00000
728.00000 412.00000
764.00000 348.00000
662.00000 558.00000
646.00000 585.00000
481.00000 611.00000
460.00000 577.00000
458.00000 546.00000
443.00000 549.00000
418.00000 513.00000
393.00000 619.00000
396.00000 675.00000
IMAGE=CVGLab22M.jpg
ID=CVG3-22M 
LM=19
346.00000 686.00000
574.00000 696.00000
739.00000 692.00000
1105.00000 642.00000
1203.00000 577.00000
1221.00000 560.00000
1026.00000 435.00000
945.00000 470.00000
776.00000 382.00000
818.00000 309.00000
699.00000 556.00000
680.00000 590.00000
469.00000 621.00000
446.00000 582.00000
447.00000 551.00000
426.00000 552.00000
403.00000 513.00000
377.00000 626.00000
373.00000 687.00000
IMAGE=CVGLab23F.jpg
ID=CVG3-23F 
LM=19
431.00000 666.00000
630.00000 683.00000
751.00000 684.00000
1043.00000 655.00000
1138.00000 608.00000
1158.00000 589.00000
1005.00000 481.00000
918.00000 509.00000
778.00000 434.00000
811.00000 377.00000
710.00000 571.00000
699.00000 596.00000
534.00000 617.00000
522.00000 582.00000
521.00000 554.00000
506.00000 557.00000
483.00000 521.00000
457.00000 618.00000
458.00000 672.00000
IMAGE=CVGLab23M.jpg
ID=CVG3-23M 
LM=19
359.00000 678.00000
579.00000 691.00000
740.00000 690.00000
1092.00000 638.00000
1183.00000 575.00000
1200.00000 555.00000
1014.00000 437.00000
934.00000 473.00000
767.00000 381.00000
808.00000 309.00000
686.00000 553.00000
666.00000 584.00000
472.00000 613.00000
453.00000 577.00000
453.00000 546.00000
438.00000 547.00000
413.00000 510.00000
378.00000 621.00000
383.00000 681.00000
IMAGE=CVGLab24F.jpg
ID=CVG3-24F 
LM=19
384.00000 694.00000
589.00000 705.00000
726.00000 705.00000
1058.00000 668.00000
1153.00000 618.00000
1172.00000 601.00000
988.00000 485.00000
918.00000 509.00000
756.00000 436.00000
793.00000 374.00000
691.00000 587.00000
676.00000 618.00000
500.00000 638.00000
479.00000 605.00000
480.00000 575.00000
461.00000 575.00000
437.00000 538.00000
408.00000 646.00000
412.00000 699.00000
IMAGE=CVGLab24M.jpg
ID=CVG3-24M 
LM=19
343.00000 649.00000
561.00000 659.00000
706.00000 659.00000
1044.00000 615.00000
1134.00000 560.00000
1151.00000 544.00000
975.00000 432.00000
908.00000 459.00000
753.00000 376.00000
792.00000 313.00000
669.00000 536.00000
653.00000 562.00000
459.00000 589.00000
440.00000 555.00000
442.00000 523.00000
426.00000 524.00000
404.00000 491.00000
366.00000 595.00000
370.00000 652.00000
IMAGE=CVGLab25F.jpg
ID=CVG3-25F 
LM=19
426.00000 696.00000
623.00000 701.00000
744.00000 701.00000
1040.00000 680.00000
1130.00000 638.00000
1150.00000 621.00000
986.00000 504.00000
921.00000 526.00000
763.00000 454.00000
798.00000 393.00000
707.00000 588.00000
687.00000 616.00000
530.00000 640.00000
511.00000 606.00000
510.00000 578.00000
494.00000 581.00000
473.00000 546.00000
465.00000 643.00000
452.00000 698.00000
IMAGE=CVGLab25M.jpg
ID=CVG3-25M 
LM=19
333.00000 694.00000
571.00000 706.00000
745.00000 701.00000
1126.00000 635.00000
1217.00000 569.00000
1236.00000 547.00000
1038.00000 427.00000
954.00000 467.00000
778.00000 377.00000
818.00000 304.00000
698.00000 560.00000
680.00000 592.00000
456.00000 629.00000
438.00000 588.00000
439.00000 552.00000
422.00000 554.00000
392.00000 514.00000
358.00000 635.00000
364.00000 698.00000
IMAGE=CVGLab26F.jpg
ID=CVG3-26F 
LM=19
386.00000 686.00000
614.00000 695.00000
762.00000 695.00000
1086.00000 658.00000
1180.00000 602.00000
1201.00000 579.00000
1009.00000 474.00000
947.00000 504.00000
777.00000 423.00000
819.00000 359.00000
724.00000 575.00000
705.00000 604.00000
508.00000 625.00000
487.00000 590.00000
487.00000 559.00000
469.00000 560.00000
447.00000 525.00000
412.00000 633.00000
414.00000 688.00000
IMAGE=CVGLab26M.jpg
ID=CVG3-26M 
LM=19
375.00000 709.00000
591.00000 724.00000
727.00000 722.00000
1067.00000 675.00000
1166.00000 615.00000
1182.00000 598.00000
1010.00000 483.00000
919.00000 519.00000
779.00000 436.00000
818.00000 368.00000
689.00000 593.00000
672.00000 620.00000
485.00000 650.00000
471.00000 612.00000
471.00000 585.00000
455.00000 583.00000
433.00000 547.00000
398.00000 654.00000
401.00000 711.00000
IMAGE=CVGLab27F.jpg
ID=CVG3-27F
LM=19
384.00000 667.00000
590.00000 676.00000
718.00000 672.00000
1043.00000 623.00000
1136.00000 568.00000
1153.00000 552.00000
974.00000 446.00000
897.00000 477.00000
733.00000 414.00000
763.00000 354.00000
681.00000 552.00000
666.00000 582.00000
492.00000 608.00000
474.00000 577.00000
470.00000 547.00000
455.00000 549.00000
431.00000 512.00000
408.00000 614.00000
408.00000 670.00000
IMAGE=CVGLab27M.jpg
ID=CVG3-27M 
LM=19
339.00000 695.00000
567.00000 717.00000
706.00000 715.00000
1066.00000 682.00000
1178.00000 629.00000
1196.00000 613.00000
1015.00000 480.00000
935.00000 509.00000
776.00000 418.00000
815.00000 351.00000
673.00000 581.00000
661.00000 612.00000
462.00000 634.00000
447.00000 595.00000
446.00000 565.00000
430.00000 567.00000
403.00000 528.00000
369.00000 639.00000
365.00000 699.00000
IMAGE=CVGLab28F.jpg
ID=CVG3-28F 
LM=19
380.00000 689.00000
595.00000 701.00000
747.00000 702.00000
1089.00000 664.00000
1178.00000 608.00000
1195.00000 588.00000
1008.00000 478.00000
939.00000 506.00000
762.00000 431.00000
802.00000 362.00000
702.00000 581.00000
685.00000 606.00000
501.00000 629.00000
476.00000 594.00000
475.00000 565.00000
458.00000 566.00000
434.00000 530.00000
406.00000 636.00000
410.00000 693.00000
IMAGE=CVGLab28M.jpg
ID=CVG3-28M 
LM=19
336.00000 643.00000
548.00000 660.00000
687.00000 661.00000
1053.00000 614.00000
1150.00000 550.00000
1162.00000 538.00000
972.00000 414.00000
898.00000 444.00000
747.00000 360.00000
787.00000 291.00000
651.00000 528.00000
636.00000 557.00000
449.00000 582.00000
431.00000 546.00000
437.00000 515.00000
418.00000 515.00000
393.00000 477.00000
359.00000 590.00000
361.00000 646.00000
IMAGE=CVGLab29F.jpg
ID=CVG3-29F 
LM=19
366.00000 692.00000
581.00000 707.00000
721.00000 705.00000
1061.00000 660.00000
1152.00000 605.00000
1171.00000 585.00000
982.00000 466.00000
907.00000 498.00000
749.00000 411.00000
782.00000 354.00000
668.00000 571.00000
654.00000 604.00000
486.00000 630.00000
465.00000 588.00000
464.00000 557.00000
446.00000 556.00000
416.00000 519.00000
388.00000 632.00000
395.00000 696.00000
IMAGE=CVGLab29M.jpg
ID=CVG3-29M 
LM=19
353.00000 682.00000
577.00000 696.00000
721.00000 695.00000
1083.00000 638.00000
1172.00000 578.00000
1186.00000 565.00000
999.00000 437.00000
934.00000 465.00000
767.00000 385.00000
805.00000 316.00000
672.00000 560.00000
660.00000 588.00000
473.00000 622.00000
454.00000 584.00000
455.00000 552.00000
438.00000 555.00000
409.00000 518.00000
378.00000 628.00000
380.00000 686.00000
IMAGE=CVGLab2F.jpg
ID=CVG3- 2F 
LM=19
422.00000 662.00000
623.00000 668.00000
743.00000 662.00000
1064.00000 615.00000
1152.00000 555.00000
1167.00000 536.00000
986.00000 443.00000
912.00000 473.00000
758.00000 408.00000
789.00000 350.00000
702.00000 546.00000
689.00000 573.00000
531.00000 600.00000
510.00000 568.00000
507.00000 539.00000
489.00000 541.00000
466.00000 507.00000
442.00000 609.00000
445.00000 662.00000
IMAGE=CVGLab2M.jpg
ID=CVG3- 2M 
LM=19
366.00000 675.00000
573.00000 691.00000
703.00000 692.00000
1045.00000 647.00000
1143.00000 590.00000
1158.00000 578.00000
986.00000 470.00000
913.00000 498.00000
769.00000 423.00000
805.00000 358.00000
689.00000 570.00000
673.00000 597.00000
483.00000 619.00000
466.00000 586.00000
466.00000 559.00000
450.00000 559.00000
428.00000 524.00000
389.00000 627.00000
393.00000 679.00000
IMAGE=CVGLab30F.jpg
ID=CVG3-30F 
LM=19
385.00000 695.00000
592.00000 705.00000
730.00000 704.00000
1066.00000 664.00000
1156.00000 611.00000
1172.00000 594.00000
990.00000 479.00000
915.00000 513.00000
758.00000 432.00000
793.00000 372.00000
677.00000 585.00000
662.00000 611.00000
498.00000 634.00000
481.00000 599.00000
479.00000 568.00000
462.00000 567.00000
438.00000 533.00000
407.00000 642.00000
415.00000 698.00000
IMAGE=CVGLab30M.jpg
ID=CVG3-30M 
LM=19
369.00000 657.00000
586.00000 672.00000
726.00000 670.00000
1085.00000 623.00000
1182.00000 563.00000
1197.00000 548.00000
1017.00000 427.00000
937.00000 456.00000
782.00000 371.00000
825.00000 304.00000
683.00000 539.00000
667.00000 567.00000
484.00000 592.00000
465.00000 556.00000
467.00000 526.00000
450.00000 524.00000
427.00000 487.00000
392.00000 596.00000
394.00000 657.00000
IMAGE=CVGLab31F.jpg
ID=CVG3-31F 
LM=19
393.00000 681.00000
596.00000 689.00000
735.00000 687.00000
1042.00000 648.00000
1139.00000 590.00000
1157.00000 570.00000
971.00000 462.00000
896.00000 492.00000
746.00000 420.00000
780.00000 359.00000
686.00000 563.00000
672.00000 591.00000
497.00000 621.00000
484.00000 587.00000
482.00000 556.00000
464.00000 558.00000
439.00000 522.00000
413.00000 629.00000
420.00000 682.00000
IMAGE=CVGLab31M.jpg
ID=CVG3-31M 
LM=19
325.00000 685.00000
560.00000 699.00000
723.00000 696.00000
1084.00000 650.00000
1180.00000 585.00000
1198.00000 563.00000
1008.00000 451.00000
934.00000 483.00000
758.00000 388.00000
802.00000 313.00000
689.00000 557.00000
671.00000 591.00000
454.00000 618.00000
432.00000 584.00000
432.00000 549.00000
412.00000 552.00000
388.00000 509.00000
348.00000 627.00000
354.00000 687.00000
IMAGE=CVGLab32F.jpg
ID=CVG3-32F 
LM=19
381.00000 682.00000
594.00000 690.00000
727.00000 689.00000
1055.00000 649.00000
1153.00000 598.00000
1172.00000 577.00000
989.00000 466.00000
903.00000 495.00000
747.00000 418.00000
784.00000 356.00000
679.00000 565.00000
668.00000 595.00000
493.00000 623.00000
475.00000 586.00000
476.00000 554.00000
457.00000 555.00000
431.00000 521.00000
404.00000 628.00000
408.00000 686.00000
IMAGE=CVGLab32M.jpg
ID=CVG3-32M 
LM=19
356.00000 656.00000
570.00000 676.00000
706.00000 674.00000
1068.00000 640.00000
1170.00000 583.00000
1187.00000 569.00000
1004.00000 443.00000
932.00000 464.00000
772.00000 378.00000
814.00000 312.00000
686.00000 537.00000
674.00000 571.00000
481.00000 596.00000
459.00000 560.00000
456.00000 527.00000
441.00000 530.00000
414.00000 493.00000
383.00000 597.00000
381.00000 661.00000
IMAGE=CVGLab33F.jpg
ID=CVG3-33F 
LM=19
402.00000 679.00000
610.00000 686.00000
746.00000 683.00000
1076.00000 647.00000
1172.00000 589.00000
1189.00000 569.00000
1005.00000 461.00000
923.00000 491.00000
773.00000 417.00000
807.00000 353.00000
709.00000 562.00000
694.00000 593.00000
514.00000 621.00000
496.00000 584.00000
494.00000 552.00000
479.00000 554.00000
452.00000 519.00000
427.00000 629.00000
431.00000 681.00000
IMAGE=CVGLab33M.jpg
ID=CVG3-33M 
LM=19
337.00000 692.00000
576.00000 709.00000
747.00000 709.00000
1122.00000 668.00000
1223.00000 599.00000
1242.00000 577.00000
1038.00000 457.00000
964.00000 491.00000
795.00000 395.00000
850.00000 319.00000
704.00000 569.00000
679.00000 600.00000
465.00000 627.00000
443.00000 590.00000
446.00000 556.00000
428.00000 558.00000
404.00000 517.00000
363.00000 633.00000
365.00000 694.00000
IMAGE=CVGLab34F.jpg
ID=CVG3-34F 
LM=19
359.00000 698.00000
577.00000 708.00000
712.00000 705.00000
1060.00000 677.00000
1169.00000 620.00000
1188.00000 602.00000
992.00000 472.00000
911.00000 506.00000
734.00000 421.00000
765.00000 354.00000
683.00000 577.00000
669.00000 607.00000
487.00000 636.00000
458.00000 597.00000
458.00000 566.00000
441.00000 567.00000
414.00000 530.00000
387.00000 642.00000
391.00000 703.00000
IMAGE=CVGLab34M.jpg
ID=CVG3-34M 
LM=19
355.00000 699.00000
566.00000 713.00000
701.00000 713.00000
1049.00000 671.00000
1158.00000 606.00000
1174.00000 590.00000
987.00000 471.00000
923.00000 498.00000
758.00000 417.00000
794.00000 349.00000
673.00000 580.00000
660.00000 611.00000
468.00000 637.00000
452.00000 601.00000
453.00000 570.00000
433.00000 575.00000
409.00000 538.00000
374.00000 645.00000
379.00000 702.00000
IMAGE=CVGLab35F.jpg
ID=CVG3-35F 
LM=19
385.00000 668.00000
598.00000 676.00000
745.00000 672.00000
1086.00000 633.00000
1185.00000 577.00000
1203.00000 562.00000
1009.00000 437.00000
926.00000 469.00000
765.00000 390.00000
797.00000 325.00000
701.00000 546.00000
684.00000 575.00000
504.00000 607.00000
483.00000 568.00000
482.00000 538.00000
465.00000 540.00000
438.00000 500.00000
408.00000 613.00000
415.00000 670.00000
IMAGE=CVGLab35M.jpg
ID=CVG3-35M 
LM=19
344.00000 693.00000
566.00000 711.00000
715.00000 710.00000
1081.00000 654.00000
1182.00000 584.00000
1198.00000 566.00000
1003.00000 446.00000
934.00000 473.00000
764.00000 399.00000
805.00000 327.00000
672.00000 565.00000
657.00000 599.00000
460.00000 628.00000
443.00000 589.00000
443.00000 559.00000
425.00000 561.00000
400.00000 521.00000
368.00000 635.00000
370.00000 694.00000
IMAGE=CVGLab36F.jpg
ID=CVG3-36F 
LM=19
383.00000 695.00000
592.00000 703.00000
730.00000 702.00000
1053.00000 666.00000
1156.00000 610.00000
1176.00000 592.00000
1001.00000 470.00000
907.00000 506.00000
760.00000 431.00000
792.00000 366.00000
682.00000 577.00000
667.00000 606.00000
497.00000 634.00000
480.00000 597.00000
480.00000 567.00000
464.00000 567.00000
437.00000 532.00000
406.00000 642.00000
412.00000 698.00000
IMAGE=CVGLab36M.jpg
ID=CVG3-36M
LM=19
350.00000 683.00000
568.00000 697.00000
712.00000 698.00000
1067.00000 660.00000
1176.00000 599.00000
1193.00000 583.00000
1012.00000 457.00000
925.00000 491.00000
784.00000 400.00000
823.00000 332.00000
683.00000 563.00000
665.00000 595.00000
471.00000 623.00000
454.00000 582.00000
456.00000 552.00000
439.00000 551.00000
412.00000 516.00000
375.00000 629.00000
377.00000 685.00000
IMAGE=CVGLab37F.jpg
ID=CVG3-37F 
LM=19
372.00000 671.00000
584.00000 689.00000
722.00000 684.00000
1061.00000 636.00000
1158.00000 578.00000
1176.00000 558.00000
980.00000 447.00000
904.00000 477.00000
748.00000 402.00000
780.00000 340.00000
684.00000 552.00000
669.00000 582.00000
482.00000 612.00000
469.00000 573.00000
468.00000 541.00000
452.00000 544.00000
426.00000 504.00000
395.00000 618.00000
399.00000 677.00000
IMAGE=CVGLab37M.jpg
ID=CVG3-37M 
LM=19
370.00000 725.00000
592.00000 748.00000
728.00000 749.00000
1107.00000 713.00000
1208.00000 653.00000
1221.00000 640.00000
1042.00000 506.00000
975.00000 527.00000
798.00000 440.00000
834.00000 377.00000
705.00000 611.00000
689.00000 642.00000
489.00000 668.00000
474.00000 627.00000
474.00000 596.00000
455.00000 597.00000
426.00000 558.00000
398.00000 669.00000
398.00000 730.00000
IMAGE=CVGLab38F.jpg
ID=CVG3-38F 
LM=19
361.00000 670.00000
574.00000 681.00000
716.00000 677.00000
1054.00000 640.00000
1155.00000 578.00000
1172.00000 557.00000
978.00000 445.00000
892.00000 477.00000
731.00000 396.00000
761.00000 335.00000
672.00000 554.00000
655.00000 585.00000
474.00000 607.00000
456.00000 573.00000
455.00000 540.00000
435.00000 541.00000
410.00000 503.00000
380.00000 616.00000
386.00000 672.00000
IMAGE=CVGLab38M.jpg
ID=CVG3-38M 
LM=19
316.00000 694.00000
549.00000 711.00000
697.00000 709.00000
1078.00000 670.00000
1193.00000 606.00000
1210.00000 589.00000
1012.00000 458.00000
932.00000 482.00000
763.00000 394.00000
795.00000 324.00000
667.00000 570.00000
653.00000 599.00000
440.00000 628.00000
422.00000 588.00000
423.00000 558.00000
406.00000 558.00000
381.00000 515.00000
340.00000 636.00000
342.00000 698.00000
IMAGE=CVGLab39F.jpg
ID=CVG3-39F 
LM=19
403.00000 630.00000
605.00000 633.00000
739.00000 628.00000
1048.00000 591.00000
1148.00000 533.00000
1163.00000 517.00000
986.00000 410.00000
907.00000 440.00000
764.00000 366.00000
789.00000 308.00000
709.00000 513.00000
697.00000 539.00000
519.00000 568.00000
497.00000 532.00000
493.00000 503.00000
477.00000 505.00000
450.00000 469.00000
426.00000 577.00000
429.00000 632.00000
IMAGE=CVGLab39M.jpg
ID=CVG3-39M 
LM=19
357.00000 681.00000
568.00000 694.00000
717.00000 692.00000
1076.00000 638.00000
1170.00000 579.00000
1186.00000 560.00000
1006.00000 446.00000
925.00000 474.00000
767.00000 393.00000
804.00000 321.00000
679.00000 554.00000
666.00000 585.00000
470.00000 616.00000
454.00000 578.00000
458.00000 547.00000
440.00000 548.00000
415.00000 515.00000
381.00000 623.00000
382.00000 684.00000
IMAGE=CVGLab3F.jpg
ID=CVG3- 3F 
LM=19
393.00000 695.00000
588.00000 703.00000
713.00000 699.00000
1011.00000 662.00000
1097.00000 614.00000
1116.00000 596.00000
946.00000 490.00000
879.00000 518.00000
732.00000 451.00000
773.00000 390.00000
675.00000 587.00000
661.00000 613.00000
499.00000 639.00000
478.00000 608.00000
480.00000 578.00000
464.00000 582.00000
439.00000 549.00000
412.00000 649.00000
417.00000 698.00000
IMAGE=CVGLab3M.jpg
ID=CVG3- 3M 
LM=19
342.00000 720.00000
561.00000 738.00000
708.00000 734.00000
1090.00000 698.00000
1204.00000 634.00000
1224.00000 616.00000
1025.00000 473.00000
941.00000 506.00000
764.00000 414.00000
799.00000 343.00000
683.00000 590.00000
669.00000 622.00000
462.00000 654.00000
439.00000 614.00000
435.00000 582.00000
418.00000 586.00000
392.00000 546.00000
362.00000 663.00000
368.00000 724.00000
IMAGE=CVGLab40F.jpg
ID=CVG3-40F 
LM=19
385.00000 689.00000
588.00000 700.00000
718.00000 699.00000
1041.00000 652.00000
1125.00000 584.00000
1139.00000 562.00000
968.00000 486.00000
896.00000 519.00000
748.00000 442.00000
785.00000 382.00000
676.00000 587.00000
660.00000 615.00000
493.00000 634.00000
479.00000 600.00000
480.00000 570.00000
462.00000 572.00000
441.00000 535.00000
412.00000 636.00000
411.00000 693.00000
IMAGE=CVGLab40M.jpg
ID=CVG3-40M 
LM=19
348.00000 661.00000
568.00000 680.00000
700.00000 680.00000
1063.00000 652.00000
1168.00000 596.00000
1183.00000 580.00000
1002.00000 454.00000
933.00000 476.00000
773.00000 386.00000
806.00000 326.00000
685.00000 548.00000
670.00000 577.00000
467.00000 602.00000
454.00000 566.00000
457.00000 532.00000
438.00000 532.00000
409.00000 498.00000
374.00000 608.00000
374.00000 666.00000
IMAGE=CVGLab41F.jpg
ID=CVG3-41F 
LM=19
371.00000 665.00000
570.00000 673.00000
704.00000 672.00000
1025.00000 641.00000
1120.00000 591.00000
1140.00000 573.00000
963.00000 454.00000
879.00000 483.00000
733.00000 408.00000
769.00000 344.00000
673.00000 546.00000
653.00000 580.00000
484.00000 606.00000
464.00000 570.00000
463.00000 539.00000
448.00000 540.00000
422.00000 504.00000
393.00000 611.00000
396.00000 667.00000
IMAGE=CVGLab41M.jpg
ID=CVG3-41M 
LM=19
368.00000 691.00000
595.00000 712.00000
747.00000 709.00000
1120.00000 654.00000
1221.00000 584.00000
1238.00000 567.00000
1037.00000 440.00000
976.00000 466.00000
804.00000 387.00000
837.00000 322.00000
706.00000 564.00000
694.00000 596.00000
494.00000 626.00000
475.00000 588.00000
474.00000 556.00000
456.00000 555.00000
427.00000 520.00000
395.00000 629.00000
395.00000 694.00000
IMAGE=CVGLab42F.jpg
ID=CVG3-42F 
LM=19
365.00000 685.00000
569.00000 693.00000
709.00000 691.00000
1028.00000 650.00000
1114.00000 600.00000
1131.00000 583.00000
963.00000 471.00000
871.00000 502.00000
715.00000 432.00000
749.00000 358.00000
658.00000 570.00000
643.00000 602.00000
477.00000 625.00000
457.00000 591.00000
456.00000 561.00000
441.00000 562.00000
416.00000 529.00000
388.00000 633.00000
392.00000 687.00000
IMAGE=CVGLab42M.jpg
ID=CVG3-42M 
LM=19
357.00000 701.00000
579.00000 717.00000
720.00000 717.00000
1066.00000 673.00000
1167.00000 618.00000
1185.00000 602.00000
1017.00000 472.00000
926.00000 505.00000
772.00000 420.00000
810.00000 355.00000
673.00000 584.00000
661.00000 614.00000
474.00000 642.00000
454.00000 605.00000
456.00000 575.00000
438.00000 580.00000
417.00000 543.00000
383.00000 647.00000
385.00000 705.00000
IMAGE=CVGLab43F.jpg
ID=CVG3-43F 
LM=19
391.00000 685.00000
599.00000 692.00000
734.00000 691.00000
1035.00000 649.00000
1122.00000 592.00000
1137.00000 577.00000
969.00000 476.00000
886.00000 506.00000
740.00000 437.00000
774.00000 373.00000
681.00000 577.00000
665.00000 603.00000
502.00000 628.00000
484.00000 595.00000
483.00000 568.00000
467.00000 567.00000
443.00000 533.00000
412.00000 637.00000
420.00000 688.00000
IMAGE=CVGLab43M.jpg
ID=CVG3-43M 
LM=19
386.00000 699.00000
606.00000 711.00000
741.00000 710.00000
1103.00000 663.00000
1202.00000 602.00000
1218.00000 587.00000
1035.00000 463.00000
959.00000 493.00000
802.00000 407.00000
838.00000 341.00000
709.00000 571.00000
696.00000 605.00000
506.00000 634.00000
485.00000 596.00000
487.00000 565.00000
465.00000 564.00000
439.00000 528.00000
413.00000 636.00000
412.00000 702.00000
IMAGE=CVGLab44F.jpg
ID=CVG3-44F 
LM=19
388.00000 668.00000
602.00000 681.00000
737.00000 680.00000
1049.00000 629.00000
1139.00000 575.00000
1155.00000 558.00000
981.00000 452.00000
903.00000 487.00000
745.00000 417.00000
781.00000 349.00000
692.00000 559.00000
673.00000 590.00000
504.00000 611.00000
486.00000 578.00000
486.00000 547.00000
470.00000 548.00000
442.00000 514.00000
414.00000 617.00000
417.00000 672.00000
IMAGE=CVGLab44M.jpg
ID=CVG3-44M 
LM=19
345.00000 662.00000
564.00000 672.00000
701.00000 672.00000
1072.00000 626.00000
1176.00000 558.00000
1193.00000 540.00000
1001.00000 424.00000
918.00000 456.00000
760.00000 375.00000
799.00000 300.00000
682.00000 537.00000
665.00000 570.00000
466.00000 598.00000
445.00000 560.00000
446.00000 531.00000
430.00000 532.00000
402.00000 495.00000
368.00000 607.00000
370.00000 664.00000
IMAGE=CVGLab45F.jpg
ID=CVG3-45F 
LM=19
403.00000 664.00000
610.00000 674.00000
742.00000 673.00000
1042.00000 635.00000
1130.00000 579.00000
1147.00000 563.00000
977.00000 450.00000
909.00000 476.00000
750.00000 408.00000
784.00000 347.00000
690.00000 555.00000
676.00000 582.00000
514.00000 604.00000
498.00000 571.00000
496.00000 541.00000
478.00000 542.00000
453.00000 507.00000
424.00000 614.00000
426.00000 667.00000
IMAGE=CVGLab45M.jpg
ID=CVG3-45M 
LM=19
368.00000 659.00000
584.00000 674.00000
721.00000 673.00000
1086.00000 631.00000
1185.00000 573.00000
1205.00000 556.00000
1018.00000 435.00000
942.00000 462.00000
776.00000 376.00000
810.00000 310.00000
697.00000 539.00000
683.00000 569.00000
491.00000 598.00000
466.00000 561.00000
467.00000 530.00000
446.00000 530.00000
426.00000 493.00000
392.00000 604.00000
394.00000 663.00000
IMAGE=CVGLab46F.jpg
ID=CVG3-46F 
LM=19
387.00000 674.00000
594.00000 684.00000
724.00000 683.00000
1030.00000 643.00000
1118.00000 588.00000
1132.00000 573.00000
966.00000 467.00000
889.00000 496.00000
742.00000 422.00000
775.00000 364.00000
687.00000 566.00000
672.00000 593.00000
500.00000 618.00000
482.00000 584.00000
480.00000 554.00000
463.00000 553.00000
439.00000 520.00000
409.00000 624.00000
415.00000 675.00000
IMAGE=CVGLab46M.jpg
ID=CVG3-46M 
LM=19
309.00000 685.00000
528.00000 698.00000
670.00000 695.00000
1047.00000 645.00000
1151.00000 578.00000
1164.00000 562.00000
965.00000 440.00000
887.00000 469.00000
728.00000 390.00000
761.00000 315.00000
645.00000 557.00000
628.00000 589.00000
435.00000 618.00000
413.00000 581.00000
416.00000 550.00000
396.00000 549.00000
369.00000 513.00000
332.00000 626.00000
335.00000 687.00000
IMAGE=CVGLab47F.jpg
ID=CVG3-47F 
LM=19
409.00000 664.00000
600.00000 677.00000
721.00000 677.00000
1012.00000 648.00000
1103.00000 594.00000
1117.00000 580.00000
948.00000 478.00000
881.00000 500.00000
738.00000 433.00000
776.00000 369.00000
689.00000 562.00000
675.00000 590.00000
514.00000 612.00000
495.00000 579.00000
495.00000 554.00000
480.00000 554.00000
458.00000 520.00000
435.00000 618.00000
433.00000 668.00000
IMAGE=CVGLab47M.jpg
ID=CVG3-47M 
LM=19
371.00000 664.00000
599.00000 681.00000
744.00000 678.00000
1113.00000 628.00000
1214.00000 558.00000
1229.00000 540.00000
1037.00000 427.00000
954.00000 460.00000
803.00000 369.00000
844.00000 295.00000
700.00000 540.00000
685.00000 571.00000
493.00000 600.00000
474.00000 563.00000
477.00000 528.00000
457.00000 530.00000
432.00000 492.00000
390.00000 606.00000
396.00000 669.00000
IMAGE=CVGLab48F.jpg
ID=CVG3-48F 
LM=19
426.00000 672.00000
632.00000 683.00000
767.00000 680.00000
1075.00000 634.00000
1170.00000 573.00000
1185.00000 554.00000
1018.00000 447.00000
944.00000 482.00000
784.00000 405.00000
810.00000 347.00000
720.00000 560.00000
707.00000 587.00000
540.00000 614.00000
521.00000 579.00000
520.00000 549.00000
501.00000 549.00000
476.00000 516.00000
448.00000 620.00000
452.00000 676.00000
IMAGE=CVGLab48M.jpg
ID=CVG3-48M 
LM=19
379.00000 686.00000
590.00000 703.00000
726.00000 702.00000
1090.00000 664.00000
1196.00000 606.00000
1208.00000 591.00000
1038.00000 465.00000
956.00000 490.00000
791.00000 407.00000
827.00000 344.00000
700.00000 574.00000
682.00000 603.00000
500.00000 628.00000
478.00000 591.00000
480.00000 560.00000
461.00000 562.00000
439.00000 526.00000
404.00000 634.00000
407.00000 691.00000
IMAGE=CVGLab49F.jpg
ID=CVG3-49F 
LM=19
406.00000 624.00000
606.00000 636.00000
735.00000 637.00000
1034.00000 598.00000
1118.00000 549.00000
1133.00000 536.00000
970.00000 429.00000
892.00000 453.00000
754.00000 390.00000
790.00000 329.00000
691.00000 520.00000
676.00000 548.00000
513.00000 568.00000
499.00000 536.00000
501.00000 505.00000
482.00000 508.00000
460.00000 473.00000
429.00000 573.00000
431.00000 627.00000
IMAGE=CVGLab49M.jpg
ID=CVG3-49M 
LM=19
394.00000 671.00000
594.00000 685.00000
724.00000 680.00000
1063.00000 635.00000
1159.00000 576.00000
1171.00000 560.00000
1007.00000 447.00000
940.00000 471.00000
786.00000 397.00000
824.00000 332.00000
701.00000 553.00000
686.00000 583.00000
505.00000 610.00000
488.00000 577.00000
488.00000 546.00000
470.00000 547.00000
444.00000 515.00000
416.00000 619.00000
419.00000 674.00000
IMAGE=CVGLab4F.jpg
ID=CVG3- 4F 
LM=19
439.00000 681.00000
640.00000 689.00000
775.00000 686.00000
1082.00000 645.00000
1169.00000 591.00000
1184.00000 575.00000
1015.00000 468.00000
939.00000 498.00000
788.00000 430.00000
821.00000 365.00000
723.00000 568.00000
708.00000 595.00000
545.00000 621.00000
526.00000 588.00000
524.00000 558.00000
507.00000 560.00000
486.00000 526.00000
461.00000 628.00000
466.00000 682.00000
IMAGE=CVGLab4M.jpg
ID=CVG3- 4M 
LM=19
397.00000 678.00000
598.00000 700.00000
735.00000 702.00000
1087.00000 658.00000
1182.00000 597.00000
1196.00000 582.00000
1030.00000 463.00000
946.00000 492.00000
797.00000 415.00000
833.00000 351.00000
709.00000 572.00000
692.00000 601.00000
514.00000 625.00000
497.00000 588.00000
497.00000 557.00000
480.00000 557.00000
461.00000 523.00000
424.00000 626.00000
421.00000 682.00000
IMAGE=CVGLab50F.jpg
ID=CVG3-50F 
LM=19
370.00000 627.00000
560.00000 638.00000
682.00000 637.00000
995.00000 600.00000
1085.00000 545.00000
1100.00000 530.00000
930.00000 418.00000
853.00000 446.00000
705.00000 380.00000
742.00000 315.00000
651.00000 520.00000
640.00000 549.00000
479.00000 573.00000
462.00000 539.00000
460.00000 508.00000
443.00000 511.00000
419.00000 475.00000
394.00000 579.00000
396.00000 631.00000
IMAGE=CVGLab50M.jpg
ID=CVG3-50M 
LM=19
340.00000 639.00000
547.00000 657.00000
692.00000 658.00000
1036.00000 616.00000
1131.00000 556.00000
1146.00000 540.00000
970.00000 422.00000
887.00000 455.00000
747.00000 371.00000
785.00000 303.00000
655.00000 530.00000
640.00000 556.00000
452.00000 582.00000
436.00000 548.00000
437.00000 518.00000
421.00000 519.00000
398.00000 485.00000
361.00000 586.00000
362.00000 641.00000
IMAGE=CVGLab5F.jpg
ID=CVG3- 5F 
LM=19
428.00000 668.00000
605.00000 673.00000
721.00000 673.00000
1003.00000 636.00000
1082.00000 583.00000
1097.00000 567.00000
943.00000 474.00000
869.00000 508.00000
741.00000 451.00000
771.00000 396.00000
685.00000 572.00000
672.00000 595.00000
522.00000 616.00000
506.00000 590.00000
509.00000 564.00000
495.00000 565.00000
473.00000 534.00000
448.00000 621.00000
451.00000 670.00000
IMAGE=CVGLab5M.jpg
ID=CVG3- 5M 
LM=19
412.00000 645.00000
596.00000 656.00000
725.00000 655.00000
1026.00000 607.00000
1112.00000 546.00000
1125.00000 529.00000
975.00000 433.00000
900.00000 465.00000
767.00000 401.00000
807.00000 344.00000
703.00000 542.00000
689.00000 565.00000
516.00000 594.00000
499.00000 564.00000
501.00000 536.00000
485.00000 540.00000
463.00000 506.00000
434.00000 599.00000
435.00000 648.00000
IMAGE=CVGLab6F.jpg
ID=CVG3- 6F 
LM=19
363.00000 674.00000
583.00000 690.00000
731.00000 687.00000
1077.00000 622.00000
1166.00000 561.00000
1185.00000 542.00000
999.00000 443.00000
934.00000 480.00000
757.00000 405.00000
790.00000 338.00000
699.00000 560.00000
675.00000 590.00000
484.00000 614.00000
467.00000 575.00000
466.00000 544.00000
450.00000 548.00000
424.00000 508.00000
390.00000 620.00000
391.00000 679.00000
IMAGE=CVGLab6M.jpg
ID=CVG3- 6M 
LM=19
326.00000 712.00000
548.00000 730.00000
701.00000 728.00000
1058.00000 683.00000
1161.00000 627.00000
1176.00000 612.00000
989.00000 491.00000
907.00000 521.00000
758.00000 433.00000
800.00000 364.00000
643.00000 595.00000
629.00000 625.00000
446.00000 650.00000
432.00000 612.00000
433.00000 582.00000
414.00000 583.00000
392.00000 541.00000
350.00000 656.00000
353.00000 714.00000
IMAGE=CVGLab7F.jpg
ID=CVG3- 7F 
LM=19
384.00000 683.00000
599.00000 695.00000
745.00000 693.00000
1077.00000 652.00000
1176.00000 595.00000
1198.00000 572.00000
1005.00000 463.00000
936.00000 495.00000
766.00000 421.00000
808.00000 358.00000
711.00000 569.00000
691.00000 599.00000
504.00000 623.00000
482.00000 588.00000
480.00000 558.00000
461.00000 560.00000
441.00000 523.00000
407.00000 633.00000
413.00000 687.00000
IMAGE=CVGLab7M.jpg
ID=CVG3- 7M 
LM=19
330.00000 683.00000
550.00000 705.00000
704.00000 706.00000
1077.00000 658.00000
1178.00000 594.00000
1197.00000 575.00000
1002.00000 449.00000
932.00000 474.00000
764.00000 389.00000
808.00000 320.00000
667.00000 564.00000
650.00000 594.00000
452.00000 624.00000
433.00000 583.00000
434.00000 552.00000
416.00000 554.00000
392.00000 517.00000
356.00000 625.00000
357.00000 687.00000
IMAGE=CVGLab8F.jpg
ID=CVG3- 8F 
LM=19
359.00000 689.00000
580.00000 702.00000
741.00000 700.00000
1086.00000 655.00000
1176.00000 601.00000
1197.00000 580.00000
1009.00000 464.00000
934.00000 498.00000
748.00000 414.00000
785.00000 349.00000
684.00000 575.00000
667.00000 606.00000
479.00000 629.00000
458.00000 596.00000
455.00000 562.00000
439.00000 562.00000
411.00000 527.00000
380.00000 637.00000
383.00000 694.00000
IMAGE=CVGLab8M.jpg
ID=CVG3- 8M 
LM=19
378.00000 677.00000
580.00000 685.00000
710.00000 684.00000
1030.00000 638.00000
1114.00000 589.00000
1128.00000 575.00000
975.00000 463.00000
913.00000 486.00000
760.00000 412.00000
799.00000 349.00000
676.00000 562.00000
662.00000 586.00000
484.00000 614.00000
470.00000 583.00000
473.00000 554.00000
456.00000 556.00000
432.00000 523.00000
402.00000 624.00000
403.00000 678.00000
IMAGE=CVGLab9F.jpg
ID=CVG3- 9F 
LM=19
361.00000 666.00000
579.00000 677.00000
733.00000 675.00000
1071.00000 629.00000
1165.00000 573.00000
1185.00000 551.00000
987.00000 441.00000
922.00000 472.00000
747.00000 390.00000
783.00000 325.00000
696.00000 547.00000
678.00000 580.00000
479.00000 604.00000
463.00000 571.00000
458.00000 539.00000
442.00000 541.00000
415.00000 505.00000
388.00000 613.00000
387.00000 670.00000
IMAGE=CVGLab9M.jpg
ID=CVG3- 9M
LM=19
323.00000 668.00000
567.00000 686.00000
729.00000 683.00000
1093.00000 627.00000
1192.00000 554.00000
1209.00000 531.00000
1026.00000 424.00000
950.00000 461.00000
784.00000 360.00000
824.00000 289.00000
677.00000 540.00000
657.00000 573.00000
459.00000 597.00000
435.00000 565.00000
439.00000 528.00000
419.00000 530.00000
395.00000 493.00000
354.00000 608.00000
354.00000 673.00000
IMAGE=CV 1-1 F.jpg
ID=CVG1- 1F 
LM=19
371.00000 679.00000
599.00000 687.00000
746.00000 686.00000
1060.00000 642.00000
1150.00000 575.00000
1163.00000 554.00000
989.00000 459.00000
920.00000 491.00000
769.00000 412.00000
803.00000 351.00000
689.00000 560.00000
672.00000 592.00000
491.00000 616.00000
470.00000 581.00000
473.00000 552.00000
454.00000 552.00000
432.00000 517.00000
394.00000 624.00000
397.00000 681.00000
IMAGE=CV 1-1 M.jpg
ID=CVG1- 1M 
LM=19
276.00000 657.00000
528.00000 673.00000
706.00000 670.00000
1079.00000 622.00000
1181.00000 550.00000
1195.00000 531.00000
999.00000 423.00000
909.00000 463.00000
755.00000 356.00000
803.00000 281.00000
648.00000 534.00000
629.00000 567.00000
405.00000 591.00000
385.00000 558.00000
389.00000 524.00000
370.00000 524.00000
352.00000 486.00000
301.00000 597.00000
309.00000 661.00000
IMAGE=CV 1-2 F.jpg
ID=CVG1- 2F 
LM=19
377.00000 653.00000
579.00000 669.00000
719.00000 666.00000
1025.00000 630.00000
1116.00000 564.00000
1133.00000 545.00000
953.00000 459.00000
885.00000 491.00000
742.00000 409.00000
785.00000 348.00000
680.00000 551.00000
659.00000 576.00000
489.00000 595.00000
471.00000 566.00000
470.00000 536.00000
454.00000 541.00000
434.00000 505.00000
406.00000 598.00000
401.00000 656.00000
IMAGE=CV 1-2 M.jpg
ID=CVG1- 2M 
LM=19
314.00000 660.00000
546.00000 677.00000
691.00000 671.00000
1054.00000 616.00000
1150.00000 551.00000
1165.00000 532.00000
986.00000 424.00000
911.00000 453.00000
753.00000 361.00000
794.00000 294.00000
652.00000 533.00000
633.00000 569.00000
430.00000 597.00000
413.00000 563.00000
413.00000 531.00000
396.00000 532.00000
370.00000 498.00000
346.00000 600.00000
340.00000 664.00000
IMAGE=CV 1-3 F.jpg
ID=CVG1- 3F 
LM=19
371.00000 676.00000
603.00000 694.00000
748.00000 692.00000
1063.00000 652.00000
1162.00000 589.00000
1180.00000 569.00000
991.00000 455.00000
918.00000 489.00000
751.00000 401.00000
795.00000 338.00000
696.00000 555.00000
677.00000 588.00000
491.00000 611.00000
475.00000 575.00000
476.00000 541.00000
457.00000 540.00000
432.00000 502.00000
394.00000 617.00000
400.00000 680.00000
IMAGE=CV 1-3 M.jpg
ID=CVG1- 3M 
LM=19
366.00000 688.00000
580.00000 704.00000
717.00000 698.00000
1023.00000 653.00000
1113.00000 577.00000
1123.00000 559.00000
970.00000 497.00000
923.00000 516.00000
773.00000 436.00000
816.00000 373.00000
692.00000 586.00000
677.00000 611.00000
485.00000 631.00000
469.00000 602.00000
470.00000 572.00000
450.00000 570.00000
428.00000 539.00000
389.00000 637.00000
389.00000 691.00000
IMAGE=CV 1-4 F.jpg
ID=CVG1- 4F 
LM=19
396.00000 670.00000
609.00000 681.00000
747.00000 677.00000
1055.00000 635.00000
1133.00000 576.00000
1147.00000 558.00000
984.00000 456.00000
913.00000 491.00000
762.00000 412.00000
797.00000 352.00000
719.00000 554.00000
699.00000 586.00000
510.00000 608.00000
491.00000 575.00000
491.00000 547.00000
476.00000 549.00000
453.00000 513.00000
417.00000 615.00000
423.00000 674.00000
IMAGE=CV 1-4 M.jpg
ID=CVG1- 4M 
LM=19
327.00000 656.00000
551.00000 677.00000
692.00000 678.00000
1019.00000 628.00000
1106.00000 562.00000
1119.00000 543.00000
960.00000 463.00000
889.00000 493.00000
737.00000 397.00000
784.00000 333.00000
655.00000 551.00000
633.00000 576.00000
446.00000 598.00000
428.00000 564.00000
433.00000 539.00000
415.00000 538.00000
394.00000 504.00000
352.00000 602.00000
353.00000 659.00000
IMAGE=CV 1-5 F.jpg
ID=CVG1- 5F 
LM=19
343.00000 664.00000
567.00000 679.00000
725.00000 682.00000
1051.00000 635.00000
1138.00000 575.00000
1154.00000 555.00000
985.00000 451.00000
909.00000 483.00000
762.00000 392.00000
806.00000 326.00000
685.00000 551.00000
660.00000 581.00000
459.00000 605.00000
438.00000 571.00000
441.00000 540.00000
423.00000 543.00000
401.00000 507.00000
373.00000 606.00000
374.00000 669.00000
IMAGE=CV 1-6 F.jpg
ID=CVG1- 6F 
LM=19
318.00000 695.00000
575.00000 691.00000
750.00000 693.00000
1129.00000 622.00000
1229.00000 536.00000
1245.00000 510.00000
1029.00000 425.00000
946.00000 463.00000
786.00000 367.00000
835.00000 287.00000
690.00000 552.00000
666.00000 588.00000
459.00000 613.00000
432.00000 576.00000
435.00000 545.00000
416.00000 549.00000
395.00000 507.00000
348.00000 630.00000
355.00000 697.00000
IMAGE=CV 2-1 F.jpg
ID=CVG1- 1F 
LM=19
343.00000 667.00000
552.00000 682.00000
686.00000 680.00000
1000.00000 634.00000
1075.00000 574.00000
1089.00000 552.00000
918.00000 467.00000
852.00000 498.00000
704.00000 421.00000
742.00000 360.00000
652.00000 563.00000
634.00000 590.00000
453.00000 610.00000
437.00000 578.00000
440.00000 547.00000
424.00000 550.00000
399.00000 516.00000
366.00000 618.00000
371.00000 670.00000
IMAGE=CV 2-1 M.jpg
ID=CVG1- 1M 
LM=19
353.00000 674.00000
576.00000 694.00000
728.00000 696.00000
1052.00000 651.00000
1137.00000 592.00000
1159.00000 568.00000
994.00000 462.00000
920.00000 494.00000
792.00000 403.00000
833.00000 347.00000
687.00000 565.00000
666.00000 594.00000
473.00000 615.00000
456.00000 580.00000
458.00000 554.00000
437.00000 553.00000
418.00000 518.00000
381.00000 620.00000
382.00000 678.00000
IMAGE=CV 2-10 F.jpg
ID=CVG1-10F 
LM=19
356.00000 690.00000
567.00000 700.00000
706.00000 700.00000
1040.00000 659.00000
1138.00000 597.00000
1151.00000 580.00000
985.00000 476.00000
902.00000 508.00000
770.00000 414.00000
816.00000 352.00000
667.00000 577.00000
652.00000 605.00000
464.00000 628.00000
456.00000 594.00000
456.00000 563.00000
437.00000 564.00000
415.00000 528.00000
379.00000 633.00000
381.00000 692.00000
IMAGE=CV 2-2 F.jpg
ID=CVG1- 2F 
LM=19
351.00000 668.00000
568.00000 683.00000
706.00000 682.00000
1019.00000 638.00000
1102.00000 582.00000
1118.00000 561.00000
954.00000 470.00000
889.00000 500.00000
722.00000 412.00000
761.00000 350.00000
667.00000 561.00000
648.00000 589.00000
465.00000 608.00000
449.00000 575.00000
449.00000 543.00000
434.00000 546.00000
406.00000 511.00000
374.00000 614.00000
376.00000 673.00000
IMAGE=CV 2-2 M.jpg
ID=CVG1- 2M 
LM=19
284.00000 682.00000
517.00000 706.00000
679.00000 703.00000
1057.00000 669.00000
1161.00000 606.00000
1182.00000 585.00000
997.00000 466.00000
914.00000 495.00000
746.00000 395.00000
790.00000 319.00000
648.00000 563.00000
623.00000 592.00000
424.00000 615.00000
398.00000 577.00000
407.00000 542.00000
383.00000 542.00000
364.00000 501.00000
314.00000 622.00000
316.00000 688.00000
IMAGE=CV 2-3 F.jpg
ID=CVG1- 3F 
LM=19
343.00000 671.00000
566.00000 690.00000
714.00000 687.00000
1033.00000 644.00000
1116.00000 588.00000
1130.00000 569.00000
953.00000 476.00000
881.00000 505.00000
744.00000 422.00000
784.00000 362.00000
674.00000 568.00000
651.00000 597.00000
462.00000 616.00000
446.00000 582.00000
448.00000 551.00000
430.00000 553.00000
410.00000 516.00000
366.00000 619.00000
370.00000 675.00000
IMAGE=CV 2-3 M.jpg
ID=CVG1- 3M 
LM=19
311.00000 674.00000
559.00000 688.00000
716.00000 686.00000
1082.00000 628.00000
1184.00000 563.00000
1204.00000 543.00000
1027.00000 439.00000
929.00000 471.00000
773.00000 364.00000
818.00000 292.00000
670.00000 542.00000
651.00000 573.00000
441.00000 601.00000
423.00000 562.00000
426.00000 528.00000
407.00000 532.00000
378.00000 495.00000
339.00000 610.00000
341.00000 676.00000
IMAGE=CV 2-4 F.jpg
ID=CVG1- 4F 
LM=19
362.00000 666.00000
564.00000 678.00000
698.00000 678.00000
996.00000 640.00000
1073.00000 589.00000
1086.00000 572.00000
925.00000 472.00000
861.00000 504.00000
715.00000 424.00000
746.00000 370.00000
673.00000 562.00000
651.00000 589.00000
472.00000 612.00000
454.00000 583.00000
456.00000 555.00000
439.00000 557.00000
417.00000 526.00000
387.00000 620.00000
390.00000 670.00000
IMAGE=CV 2-4 M.jpg
ID=CVG1- 4M 
LM=19
357.00000 649.00000
576.00000 656.00000
724.00000 655.00000
1045.00000 608.00000
1130.00000 539.00000
1146.00000 519.00000
981.00000 431.00000
918.00000 459.00000
782.00000 380.00000
815.00000 318.00000
674.00000 540.00000
652.00000 567.00000
469.00000 590.00000
454.00000 559.00000
456.00000 532.00000
439.00000 535.00000
422.00000 502.00000
377.00000 594.00000
384.00000 650.00000
IMAGE=CV 2-5 F.jpg
ID=CVG1- 5F 
LM=19
427.00000 677.00000
618.00000 688.00000
741.00000 685.00000
1016.00000 646.00000
1088.00000 589.00000
1099.00000 573.00000
952.00000 502.00000
882.00000 531.00000
759.00000 459.00000
791.00000 400.00000
707.00000 582.00000
689.00000 607.00000
528.00000 624.00000
512.00000 598.00000
514.00000 572.00000
497.00000 571.00000
476.00000 541.00000
448.00000 630.00000
452.00000 679.00000
IMAGE=CV 2-5 M.jpg
ID=CVG1- 5M  
LM=19
317.00000 671.00000
539.00000 687.00000
692.00000 683.00000
1048.00000 638.00000
1146.00000 568.00000
1161.00000 548.00000
980.00000 444.00000
904.00000 478.00000
755.00000 383.00000
796.00000 318.00000
656.00000 548.00000
633.00000 582.00000
443.00000 607.00000
420.00000 575.00000
426.00000 545.00000
405.00000 547.00000
386.00000 508.00000
349.00000 612.00000
346.00000 675.00000
IMAGE=CV 2-6 F.jpg
ID=CVG1- 6F 
LM=19
471.00000 655.00000
646.00000 662.00000
763.00000 662.00000
1012.00000 632.00000
1091.00000 573.00000
1103.00000 555.00000
955.00000 490.00000
895.00000 514.00000
781.00000 460.00000
809.00000 415.00000
734.00000 569.00000
722.00000 591.00000
566.00000 608.00000
549.00000 584.00000
555.00000 562.00000
541.00000 564.00000
523.00000 535.00000
491.00000 615.00000
491.00000 658.00000
IMAGE=CV 2-6 M.jpg
ID=CVG1- 6M 
LM=19
295.00000 722.00000
555.00000 739.00000
740.00000 739.00000
1126.00000 690.00000
1229.00000 622.00000
1246.00000 600.00000
1047.00000 477.00000
960.00000 515.00000
797.00000 403.00000
843.00000 329.00000
693.00000 588.00000
673.00000 623.00000
436.00000 651.00000
418.00000 610.00000
420.00000 575.00000
398.00000 576.00000
372.00000 533.00000
323.00000 658.00000
325.00000 725.00000
IMAGE=CV 2-8 F.jpg
ID=CVG1- 8F 
LM=19
356.00000 664.00000
571.00000 686.00000
715.00000 685.00000
1066.00000 651.00000
1159.00000 590.00000
1173.00000 570.00000
999.00000 465.00000
913.00000 493.00000
780.00000 401.00000
827.00000 335.00000
693.00000 556.00000
674.00000 588.00000
469.00000 603.00000
454.00000 573.00000
457.00000 545.00000
439.00000 545.00000
423.00000 509.00000
380.00000 610.00000
381.00000 669.00000
IMAGE=CV 2-9 F.jpg
ID=CVG1- 9F 
LM=19
308.00000 688.00000
561.00000 698.00000
739.00000 697.00000
1120.00000 643.00000
1221.00000 569.00000
1242.00000 541.00000
1046.00000 434.00000
964.00000 468.00000
783.00000 364.00000
827.00000 292.00000
688.00000 550.00000
667.00000 584.00000
435.00000 616.00000
417.00000 579.00000
418.00000 542.00000
399.00000 542.00000
369.00000 507.00000
332.00000 625.00000
341.00000 693.00000
IMAGE=CV 3-1 F.jpg
ID=CVG1- 1F 
LM=19
409.00000 664.00000
593.00000 661.00000
714.00000 669.00000
983.00000 652.00000
1061.00000 608.00000
1078.00000 593.00000
938.00000 497.00000
872.00000 521.00000
741.00000 444.00000
771.00000 394.00000
681.00000 570.00000
664.00000 592.00000
508.00000 610.00000
490.00000 585.00000
493.00000 557.00000
478.00000 560.00000
456.00000 529.00000
429.00000 620.00000
433.00000 666.00000
IMAGE=CV 3-1 M.jpg
ID=CVG1- 1M 
LM=19
296.00000 709.00000
553.00000 727.00000
716.00000 726.00000
1092.00000 682.00000
1195.00000 601.00000
1214.00000 576.00000
1030.00000 486.00000
942.00000 516.00000
776.00000 416.00000
821.00000 350.00000
673.00000 591.00000
644.00000 622.00000
425.00000 643.00000
407.00000 609.00000
413.00000 576.00000
393.00000 577.00000
371.00000 539.00000
321.00000 650.00000
329.00000 712.00000
IMAGE=CV 3-10 F.jpg
ID=CVG1-10F 
LM=19
313.00000 731.00000
568.00000 747.00000
736.00000 748.00000
1115.00000 695.00000
1220.00000 618.00000
1238.00000 590.00000
1023.00000 481.00000
946.00000 517.00000
780.00000 416.00000
828.00000 334.00000
695.00000 600.00000
675.00000 639.00000
450.00000 659.00000
431.00000 620.00000
435.00000 587.00000
411.00000 587.00000
389.00000 549.00000
343.00000 668.00000
342.00000 735.00000
IMAGE=CV 3-11 F.jpg
ID=CVG1-11F 
LM=19
358.00000 681.00000
569.00000 697.00000
714.00000 698.00000
1029.00000 653.00000
1111.00000 590.00000
1121.00000 577.00000
957.00000 479.00000
891.00000 506.00000
751.00000 426.00000
802.00000 362.00000
656.00000 576.00000
638.00000 605.00000
464.00000 626.00000
449.00000 594.00000
452.00000 568.00000
434.00000 567.00000
414.00000 536.00000
380.00000 631.00000
381.00000 683.00000
IMAGE=CV 3-12 F.jpg
ID=CVG1-12F 
LM=19
310.00000 679.00000
553.00000 695.00000
707.00000 694.00000
1084.00000 660.00000
1184.00000 588.00000
1199.00000 568.00000
1022.00000 456.00000
948.00000 485.00000
776.00000 381.00000
827.00000 310.00000
692.00000 554.00000
669.00000 588.00000
443.00000 612.00000
426.00000 575.00000
428.00000 541.00000
407.00000 543.00000
384.00000 505.00000
342.00000 618.00000
338.00000 683.00000
IMAGE=CV 3-13 F.jpg
ID=CVG1-13F 
LM=19
305.00000 680.00000
549.00000 704.00000
713.00000 707.00000
1096.00000 661.00000
1196.00000 591.00000
1213.00000 567.00000
1028.00000 470.00000
942.00000 496.00000
775.00000 400.00000
824.00000 325.00000
685.00000 568.00000
659.00000 604.00000
440.00000 621.00000
419.00000 586.00000
424.00000 552.00000
405.00000 553.00000
379.00000 515.00000
335.00000 623.00000
332.00000 687.00000
IMAGE=CV 3-14 F.jpg
ID=CVG1-14F 
LM=19
370.00000 695.00000
580.00000 707.00000
727.00000 707.00000
1066.00000 661.00000
1148.00000 600.00000
1164.00000 580.00000
990.00000 490.00000
924.00000 518.00000
786.00000 438.00000
830.00000 375.00000
702.00000 590.00000
679.00000 616.00000
487.00000 634.00000
473.00000 604.00000
475.00000 577.00000
455.00000 577.00000
433.00000 541.00000
396.00000 640.00000
397.00000 697.00000
IMAGE=CV 3-15 F.jpg
ID=CVG1-15F 
LM=19
410.00000 698.00000
608.00000 713.00000
732.00000 710.00000
1036.00000 664.00000
1112.00000 601.00000
1124.00000 585.00000
978.00000 493.00000
914.00000 524.00000
777.00000 446.00000
816.00000 388.00000
707.00000 594.00000
687.00000 619.00000
509.00000 641.00000
494.00000 613.00000
495.00000 585.00000
475.00000 586.00000
455.00000 557.00000
427.00000 649.00000
432.00000 701.00000
IMAGE=CV 3-16 F.jpg
ID=CVG1-16F 
LM=19
341.00000 677.00000
579.00000 696.00000
738.00000 697.00000
1088.00000 644.00000
1174.00000 573.00000
1187.00000 554.00000
1014.00000 448.00000
943.00000 478.00000
787.00000 387.00000
825.00000 321.00000
696.00000 556.00000
676.00000 590.00000
468.00000 611.00000
451.00000 578.00000
452.00000 544.00000
433.00000 544.00000
408.00000 505.00000
367.00000 618.00000
372.00000 682.00000
IMAGE=CV 3-17 F.jpg
ID=CVG1-17F 
LM=19
271.00000 704.00000
523.00000 723.00000
694.00000 718.00000
1073.00000 667.00000
1172.00000 597.00000
1191.00000 573.00000
982.00000 459.00000
900.00000 498.00000
741.00000 386.00000
784.00000 314.00000
649.00000 576.00000
625.00000 607.00000
401.00000 633.00000
383.00000 595.00000
385.00000 559.00000
370.00000 561.00000
341.00000 520.00000
301.00000 640.00000
302.00000 706.00000
IMAGE=CV 3-2 F.jpg
ID=CVG1- 2F 
LM=19
319.00000 697.00000
558.00000 714.00000
712.00000 712.00000
1052.00000 670.00000
1149.00000 613.00000
1171.00000 592.00000
978.00000 485.00000
883.00000 518.00000
734.00000 418.00000
779.00000 351.00000
662.00000 579.00000
637.00000 616.00000
445.00000 633.00000
426.00000 595.00000
431.00000 560.00000
411.00000 562.00000
383.00000 523.00000
344.00000 639.00000
345.00000 700.00000
IMAGE=CV 3-2 M.jpg
ID=CVG1- 2M 
LM=19
305.00000 707.00000
550.00000 723.00000
725.00000 724.00000
1084.00000 672.00000
1180.00000 597.00000
1199.00000 567.00000
994.00000 459.00000
926.00000 496.00000
764.00000 394.00000
821.00000 317.00000
657.00000 581.00000
633.00000 612.00000
435.00000 638.00000
414.00000 601.00000
418.00000 564.00000
400.00000 569.00000
371.00000 528.00000
331.00000 645.00000
337.00000 711.00000
IMAGE=CV 3-3 F.jpg
ID=CVG1- 3F 
LM=19
378.00000 649.00000
562.00000 659.00000
680.00000 660.00000
955.00000 626.00000
1031.00000 576.00000
1043.00000 559.00000
889.00000 477.00000
824.00000 504.00000
695.00000 432.00000
732.00000 386.00000
655.00000 558.00000
635.00000 584.00000
479.00000 600.00000
462.00000 572.00000
460.00000 546.00000
447.00000 548.00000
425.00000 519.00000
399.00000 604.00000
405.00000 652.00000
IMAGE=CV 3-3 M.jpg
ID=CVG1- 3M 
LM=19
295.00000 691.00000
547.00000 711.00000
716.00000 713.00000
1105.00000 672.00000
1206.00000 601.00000
1223.00000 580.00000
1021.00000 461.00000
943.00000 498.00000
775.00000 387.00000
819.00000 316.00000
689.00000 571.00000
664.00000 603.00000
433.00000 624.00000
418.00000 587.00000
419.00000 549.00000
400.00000 551.00000
372.00000 508.00000
324.00000 631.00000
326.00000 696.00000
IMAGE=CV 3-4 F.jpg
ID=CVG1- 4F 
LM=19
396.00000 672.00000
589.00000 684.00000
714.00000 683.00000
985.00000 650.00000
1062.00000 599.00000
1076.00000 580.00000
918.00000 488.00000
858.00000 514.00000
732.00000 441.00000
771.00000 384.00000
669.00000 575.00000
650.00000 603.00000
492.00000 621.00000
481.00000 591.00000
478.00000 564.00000
462.00000 566.00000
442.00000 536.00000
415.00000 627.00000
420.00000 675.00000
IMAGE=CV 3-4 M.jpg
ID=CVG1- 4M 
LM=19
376.00000 655.00000
568.00000 672.00000
698.00000 675.00000
1003.00000 632.00000
1085.00000 562.00000
1095.00000 545.00000
936.00000 462.00000
869.00000 496.00000
741.00000 421.00000
781.00000 362.00000
674.00000 560.00000
658.00000 587.00000
482.00000 603.00000
465.00000 571.00000
468.00000 547.00000
452.00000 548.00000
431.00000 517.00000
397.00000 603.00000
398.00000 657.00000
IMAGE=CV 3-5 F.jpg
ID=CVG1- 5F 
LM=19
386.00000 684.00000
602.00000 694.00000
749.00000 692.00000
1066.00000 651.00000
1156.00000 592.00000
1172.00000 571.00000
993.00000 478.00000
925.00000 510.00000
778.00000 425.00000
818.00000 362.00000
702.00000 575.00000
687.00000 606.00000
504.00000 628.00000
481.00000 597.00000
481.00000 566.00000
466.00000 568.00000
444.00000 531.00000
411.00000 631.00000
416.00000 687.00000
IMAGE=CV 3-5 M.jpg
ID=CVG1- 5M 
LM=19
365.00000 656.00000
562.00000 673.00000
691.00000 675.00000
992.00000 634.00000
1086.00000 569.00000
1098.00000 554.00000
939.00000 456.00000
878.00000 480.00000
747.00000 401.00000
782.00000 344.00000
670.00000 552.00000
653.00000 580.00000
476.00000 603.00000
458.00000 571.00000
458.00000 542.00000
441.00000 545.00000
418.00000 511.00000
389.00000 608.00000
386.00000 658.00000
IMAGE=CV 3-6 F.jpg
ID=CVG1- 6F 
LM=19
414.00000 676.00000
594.00000 692.00000
709.00000 692.00000
976.00000 658.00000
1045.00000 613.00000
1057.00000 596.00000
922.00000 512.00000
866.00000 535.00000
736.00000 467.00000
773.00000 414.00000
691.00000 590.00000
674.00000 614.00000
512.00000 628.00000
501.00000 602.00000
504.00000 575.00000
485.00000 577.00000
467.00000 544.00000
436.00000 629.00000
439.00000 680.00000
IMAGE=CV 3-6 M.jpg
ID=CVG1- 6M 
LM=19
379.00000 665.00000
588.00000 678.00000
719.00000 678.00000
1033.00000 638.00000
1123.00000 570.00000
1139.00000 547.00000
971.00000 462.00000
906.00000 492.00000
768.00000 409.00000
812.00000 349.00000
693.00000 562.00000
671.00000 588.00000
492.00000 609.00000
473.00000 581.00000
475.00000 554.00000
456.00000 555.00000
437.00000 520.00000
405.00000 614.00000
404.00000 666.00000
IMAGE=CV 3-7 F.jpg
ID=CVG1- 7F 
LM=19
408.00000 687.00000
587.00000 699.00000
703.00000 696.00000
961.00000 659.00000
1035.00000 610.00000
1049.00000 592.00000
908.00000 515.00000
839.00000 542.00000
720.00000 475.00000
750.00000 426.00000
666.00000 597.00000
650.00000 619.00000
502.00000 636.00000
489.00000 612.00000
490.00000 587.00000
475.00000 591.00000
456.00000 560.00000
426.00000 643.00000
431.00000 689.00000
IMAGE=CV 3-7 M.jpg
ID=CVG1- 7M 
LM=19
366.00000 659.00000
573.00000 668.00000
715.00000 669.00000
1007.00000 625.00000
1084.00000 559.00000
1095.00000 541.00000
943.00000 444.00000
877.00000 478.00000
739.00000 396.00000
774.00000 341.00000
661.00000 552.00000
644.00000 577.00000
474.00000 602.00000
456.00000 573.00000
459.00000 547.00000
442.00000 548.00000
416.00000 517.00000
388.00000 609.00000
392.00000 662.00000
IMAGE=CV 3-8 F.jpg
ID=CVG1- 8F 
LM=19
394.00000 680.00000
599.00000 698.00000
739.00000 699.00000
1062.00000 657.00000
1138.00000 595.00000
1149.00000 575.00000
989.00000 493.00000
919.00000 526.00000
787.00000 442.00000
839.00000 378.00000
707.00000 582.00000
687.00000 608.00000
503.00000 625.00000
489.00000 597.00000
489.00000 568.00000
472.00000 572.00000
457.00000 538.00000
422.00000 629.00000
421.00000 683.00000
IMAGE=CV 3-9 F.jpg
ID=CVG1- 9F 
LM=19
338.00000 688.00000
578.00000 697.00000
734.00000 691.00000
1112.00000 637.00000
1214.00000 561.00000
1232.00000 538.00000
1036.00000 433.00000
956.00000 468.00000
791.00000 378.00000
835.00000 303.00000
695.00000 558.00000
677.00000 590.00000
468.00000 617.00000
449.00000 581.00000
451.00000 548.00000
428.00000 549.00000
405.00000 510.00000
359.00000 625.00000
371.00000 689.00000
IMAGE=CV 4-1 F.jpg
ID=CVG2- 1F 
LM=19
368.00000 677.00000
599.00000 694.00000
746.00000 692.00000
1075.00000 628.00000
1159.00000 563.00000
1174.00000 541.00000
987.00000 456.00000
918.00000 492.00000
768.00000 429.00000
797.00000 360.00000
689.00000 575.00000
672.00000 604.00000
484.00000 624.00000
469.00000 595.00000
474.00000 565.00000
457.00000 562.00000
435.00000 524.00000
387.00000 631.00000
402.00000 681.00000
IMAGE=CV 4-1 M.jpg
ID=CVG2- 1M 
LM=19
269.00000 680.00000
530.00000 701.00000
695.00000 697.00000
1069.00000 639.00000
1172.00000 573.00000
1192.00000 552.00000
980.00000 430.00000
902.00000 465.00000
743.00000 358.00000
788.00000 284.00000
643.00000 544.00000
622.00000 585.00000
401.00000 608.00000
385.00000 571.00000
388.00000 536.00000
369.00000 535.00000
338.00000 499.00000
295.00000 618.00000
300.00000 683.00000
IMAGE=CV 4-2 F.jpg
ID=CVG2- 2F  
LM=19
348.00000 661.00000
589.00000 668.00000
745.00000 665.00000
1084.00000 619.00000
1179.00000 560.00000
1195.00000 538.00000
992.00000 429.00000
920.00000 468.00000
764.00000 394.00000
807.00000 324.00000
689.00000 546.00000
668.00000 573.00000
469.00000 597.00000
453.00000 566.00000
456.00000 532.00000
438.00000 532.00000
413.00000 493.00000
370.00000 603.00000
380.00000 664.00000
IMAGE=CV 4-2 M.jpg
ID=CVG2- 2M 
LM=19
339.00000 685.00000
592.00000 698.00000
750.00000 693.00000
1130.00000 633.00000
1221.00000 559.00000
1237.00000 536.00000
1053.00000 438.00000
971.00000 468.00000
807.00000 368.00000
850.00000 297.00000
690.00000 559.00000
674.00000 590.00000
466.00000 615.00000
450.00000 577.00000
451.00000 545.00000
430.00000 545.00000
409.00000 506.00000
366.00000 621.00000
376.00000 688.00000
IMAGE=CV 4-3 F.jpg
ID=CVG2- 3F 
LM=19
313.00000 711.00000
547.00000 728.00000
700.00000 728.00000
1042.00000 686.00000
1133.00000 629.00000
1152.00000 608.00000
961.00000 495.00000
891.00000 525.00000
718.00000 435.00000
757.00000 363.00000
628.00000 596.00000
611.00000 629.00000
433.00000 650.00000
417.00000 617.00000
419.00000 585.00000
400.00000 585.00000
378.00000 546.00000
340.00000 656.00000
344.00000 717.00000
IMAGE=CV 4-3 M.jpg
ID=CVG2- 3M 
LM=19
338.00000 666.00000
602.00000 705.00000
765.00000 702.00000
1131.00000 625.00000
1220.00000 543.00000
1238.00000 520.00000
1065.00000 450.00000
992.00000 489.00000
821.00000 385.00000
868.00000 317.00000
722.00000 551.00000
700.00000 591.00000
477.00000 609.00000
463.00000 568.00000
469.00000 530.00000
448.00000 526.00000
424.00000 489.00000
370.00000 606.00000
374.00000 674.00000
IMAGE=CV 4-4 F.jpg
ID=CVG2- 4F 
LM=19
334.00000 670.00000
565.00000 685.00000
725.00000 683.00000
1069.00000 643.00000
1163.00000 586.00000
1184.00000 567.00000
978.00000 447.00000
912.00000 479.00000
744.00000 391.00000
786.00000 317.00000
673.00000 550.00000
652.00000 584.00000
453.00000 606.00000
438.00000 570.00000
438.00000 534.00000
422.00000 537.00000
395.00000 495.00000
358.00000 612.00000
364.00000 675.00000
IMAGE=CV 4-4 M.jpg
ID=CVG2- 4M 
LM=19
414.00000 699.00000
652.00000 712.00000
798.00000 704.00000
1133.00000 653.00000
1225.00000 592.00000
1241.00000 572.00000
1038.00000 468.00000
964.00000 507.00000
812.00000 426.00000
847.00000 358.00000
747.00000 578.00000
725.00000 611.00000
535.00000 637.00000
518.00000 603.00000
522.00000 570.00000
505.00000 571.00000
480.00000 532.00000
441.00000 644.00000
448.00000 703.00000
IMAGE=CV 4-5 M.jpg
ID=CVG2- 5M 
LM=19
296.00000 717.00000
555.00000 723.00000
722.00000 724.00000
1114.00000 691.00000
1215.00000 622.00000
1233.00000 602.00000
1029.00000 473.00000
945.00000 514.00000
781.00000 409.00000
828.00000 325.00000
671.00000 592.00000
647.00000 621.00000
426.00000 647.00000
405.00000 612.00000
407.00000 578.00000
386.00000 581.00000
363.00000 540.00000
322.00000 654.00000
328.00000 719.00000
IMAGE=CV E lab 1-1 F .jpg
ID=CVE7- 1F 
LM=19
340.00000 702.00000
581.00000 711.00000
745.00000 711.00000
1090.00000 671.00000
1178.00000 612.00000
1198.00000 591.00000
1007.00000 480.00000
930.00000 515.00000
767.00000 422.00000
808.00000 354.00000
685.00000 586.00000
663.00000 613.00000
468.00000 637.00000
447.00000 599.00000
451.00000 566.00000
431.00000 568.00000
407.00000 526.00000
366.00000 644.00000
370.00000 707.00000
IMAGE=CV E lab 1-1 M .jpg
ID=CVE7- 1M  
LM=19
282.00000 724.00000
546.00000 737.00000
732.00000 737.00000
1116.00000 687.00000
1217.00000 616.00000
1239.00000 592.00000
1026.00000 460.00000
946.00000 497.00000
769.00000 399.00000
823.00000 312.00000
668.00000 588.00000
646.00000 624.00000
416.00000 655.00000
396.00000 614.00000
398.00000 578.00000
378.00000 580.00000
350.00000 540.00000
310.00000 659.00000
314.00000 728.00000
IMAGE=CV E lab 1-10 F .jpg
ID=CVE7-10F 
LM=19
325.00000 710.00000
557.00000 722.00000
719.00000 722.00000
1060.00000 686.00000
1157.00000 629.00000
1178.00000 605.00000
976.00000 490.00000
900.00000 524.00000
734.00000 431.00000
772.00000 360.00000
662.00000 594.00000
635.00000 624.00000
448.00000 644.00000
430.00000 609.00000
433.00000 576.00000
411.00000 580.00000
387.00000 539.00000
350.00000 654.00000
355.00000 714.00000
IMAGE=CV E lab 1-10 M .jpg
ID=CVE7-10M 
LM=19
307.00000 702.00000
563.00000 712.00000
735.00000 712.00000
1122.00000 670.00000
1226.00000 604.00000
1244.00000 582.00000
1049.00000 458.00000
969.00000 492.00000
793.00000 387.00000
839.00000 310.00000
674.00000 573.00000
646.00000 605.00000
440.00000 632.00000
421.00000 592.00000
420.00000 558.00000
401.00000 559.00000
374.00000 518.00000
335.00000 638.00000
336.00000 706.00000
IMAGE=CV E lab 1-11 F .jpg
ID=CVE7-11F 
LM=19
374.00000 702.00000
603.00000 712.00000
758.00000 713.00000
1092.00000 677.00000
1177.00000 623.00000
1196.00000 602.00000
1012.00000 489.00000
948.00000 517.00000
784.00000 436.00000
825.00000 371.00000
700.00000 591.00000
681.00000 618.00000
495.00000 638.00000
476.00000 605.00000
478.00000 574.00000
459.00000 575.00000
437.00000 538.00000
400.00000 645.00000
403.00000 705.00000
IMAGE=CV E lab 1-11 M .jpg
ID=CVE7-11M 
LM=19
371.00000 706.00000
606.00000 716.00000
761.00000 717.00000
1119.00000 679.00000
1209.00000 618.00000
1228.00000 592.00000
1038.00000 479.00000
954.00000 519.00000
791.00000 424.00000
838.00000 353.00000
711.00000 588.00000
689.00000 619.00000
495.00000 643.00000
478.00000 605.00000
478.00000 571.00000
460.00000 573.00000
436.00000 532.00000
395.00000 648.00000
404.00000 710.00000
IMAGE=CV E lab 1-12 F .jpg
ID=CVE7-12F 
LM=19
335.00000 725.00000
561.00000 735.00000
724.00000 731.00000
1075.00000 681.00000
1167.00000 624.00000
1190.00000 595.00000
985.00000 486.00000
909.00000 519.00000
739.00000 436.00000
783.00000 364.00000
663.00000 603.00000
639.00000 633.00000
456.00000 661.00000
434.00000 625.00000
435.00000 591.00000
416.00000 592.00000
392.00000 554.00000
360.00000 668.00000
368.00000 728.00000
IMAGE=CV E lab 1-12 M .jpg
ID=CVE7-12M 
LM=19
329.00000 730.00000
575.00000 738.00000
741.00000 737.00000
1102.00000 698.00000
1205.00000 626.00000
1225.00000 598.00000
1032.00000 478.00000
953.00000 516.00000
794.00000 408.00000
838.00000 329.00000
689.00000 597.00000
667.00000 631.00000
461.00000 660.00000
439.00000 623.00000
438.00000 590.00000
418.00000 592.00000
390.00000 552.00000
357.00000 671.00000
361.00000 733.00000
IMAGE=CV E lab 1-13 F .jpg
ID=CVE7-13F 
LM=19
355.00000 694.00000
581.00000 706.00000
733.00000 704.00000
1063.00000 662.00000
1155.00000 603.00000
1177.00000 580.00000
992.00000 468.00000
924.00000 501.00000
760.00000 416.00000
797.00000 347.00000
676.00000 579.00000
653.00000 609.00000
480.00000 632.00000
459.00000 597.00000
459.00000 564.00000
441.00000 567.00000
418.00000 529.00000
381.00000 639.00000
386.00000 699.00000
IMAGE=CV E lab 1-13 M .jpg
ID=CVE7-13M 
LM=19
323.00000 682.00000
565.00000 689.00000
726.00000 692.00000
1113.00000 642.00000
1206.00000 575.00000
1223.00000 557.00000
1029.00000 443.00000
952.00000 476.00000
782.00000 381.00000
825.00000 310.00000
681.00000 558.00000
657.00000 590.00000
453.00000 616.00000
430.00000 577.00000
435.00000 545.00000
413.00000 548.00000
390.00000 509.00000
347.00000 622.00000
352.00000 685.00000
IMAGE=CV E lab 1-14 F .jpg
ID=CVE7-14F 
LM=19
351.00000 694.00000
575.00000 707.00000
718.00000 708.00000
1055.00000 668.00000
1138.00000 616.00000
1153.00000 602.00000
980.00000 496.00000
911.00000 528.00000
753.00000 441.00000
787.00000 379.00000
668.00000 590.00000
645.00000 615.00000
474.00000 633.00000
452.00000 597.00000
455.00000 567.00000
437.00000 568.00000
419.00000 532.00000
376.00000 637.00000
383.00000 696.00000
IMAGE=CV E lab 1-14 M .jpg
ID=CVE7-14M 
LM=19
308.00000 718.00000
574.00000 731.00000
739.00000 727.00000
1121.00000 677.00000
1218.00000 600.00000
1238.00000 573.00000
1041.00000 459.00000
965.00000 498.00000
794.00000 400.00000
837.00000 321.00000
693.00000 590.00000
667.00000 622.00000
448.00000 650.00000
424.00000 610.00000
425.00000 577.00000
407.00000 580.00000
378.00000 539.00000
336.00000 658.00000
338.00000 721.00000
IMAGE=CV E lab 1-15 F .jpg
ID=CVE7-15F 
LM=19
347.00000 698.00000
573.00000 707.00000
734.00000 707.00000
1066.00000 676.00000
1164.00000 618.00000
1182.00000 600.00000
991.00000 481.00000
915.00000 520.00000
745.00000 427.00000
790.00000 357.00000
672.00000 586.00000
650.00000 611.00000
468.00000 634.00000
448.00000 598.00000
450.00000 566.00000
430.00000 569.00000
407.00000 531.00000
374.00000 642.00000
381.00000 704.00000
IMAGE=CV E lab 1-15 M .jpg
ID=CVE7-15M 
LM=19
337.00000 703.00000
581.00000 714.00000
736.00000 715.00000
1100.00000 688.00000
1201.00000 618.00000
1219.00000 597.00000
1032.00000 476.00000
957.00000 508.00000
796.00000 401.00000
842.00000 328.00000
700.00000 577.00000
675.00000 611.00000
470.00000 636.00000
449.00000 599.00000
451.00000 565.00000
432.00000 567.00000
400.00000 531.00000
366.00000 642.00000
370.00000 707.00000
IMAGE=CV E lab 1-16 F .jpg
ID=CVE7-16F 
LM=19
352.00000 685.00000
577.00000 695.00000
735.00000 694.00000
1078.00000 662.00000
1174.00000 608.00000
1195.00000 586.00000
1001.00000 464.00000
924.00000 502.00000
753.00000 409.00000
795.00000 340.00000
680.00000 569.00000
655.00000 597.00000
474.00000 621.00000
454.00000 589.00000
452.00000 556.00000
433.00000 558.00000
408.00000 520.00000
379.00000 632.00000
382.00000 692.00000
IMAGE=CV E lab 1-16 M .jpg
ID=CVE7-16M 
LM=19
314.00000 700.00000
564.00000 720.00000
728.00000 720.00000
1116.00000 672.00000
1215.00000 604.00000
1232.00000 586.00000
1038.00000 474.00000
954.00000 509.00000
792.00000 406.00000
840.00000 329.00000
700.00000 581.00000
679.00000 612.00000
455.00000 633.00000
432.00000 595.00000
437.00000 560.00000
413.00000 561.00000
389.00000 521.00000
340.00000 638.00000
347.00000 702.00000
IMAGE=CV E lab 1-17 F .jpg
ID=CVE7-17F 
LM=19
360.00000 697.00000
592.00000 712.00000
750.00000 714.00000
1081.00000 672.00000
1176.00000 612.00000
1198.00000 588.00000
1003.00000 476.00000
932.00000 509.00000
779.00000 424.00000
820.00000 353.00000
702.00000 584.00000
677.00000 615.00000
486.00000 635.00000
467.00000 599.00000
467.00000 564.00000
449.00000 566.00000
428.00000 526.00000
390.00000 641.00000
392.00000 701.00000
IMAGE=CV E lab 1-17 M .jpg
ID=CVE7-17M 
LM=19
317.00000 712.00000
560.00000 725.00000
733.00000 726.00000
1085.00000 692.00000
1188.00000 627.00000
1208.00000 607.00000
1026.00000 485.00000
946.00000 518.00000
778.00000 416.00000
827.00000 338.00000
675.00000 589.00000
649.00000 620.00000
450.00000 645.00000
431.00000 611.00000
430.00000 577.00000
411.00000 579.00000
386.00000 539.00000
347.00000 653.00000
351.00000 716.00000
IMAGE=CV E lab 1-18 F .jpg
ID=CVE7-18F 
LM=19
375.00000 704.00000
599.00000 716.00000
749.00000 714.00000
1093.00000 669.00000
1180.00000 612.00000
1201.00000 590.00000
1011.00000 475.00000
944.00000 511.00000
773.00000 424.00000
813.00000 362.00000
697.00000 588.00000
674.00000 617.00000
492.00000 642.00000
472.00000 605.00000
473.00000 575.00000
454.00000 577.00000
433.00000 539.00000
402.00000 650.00000
402.00000 708.00000
IMAGE=CV E lab 1-18 M .jpg
ID=CVE7-18M 
LM=19
314.00000 702.00000
561.00000 710.00000
724.00000 710.00000
1090.00000 665.00000
1189.00000 593.00000
1205.00000 572.00000
1016.00000 455.00000
939.00000 491.00000
775.00000 390.00000
826.00000 317.00000
689.00000 572.00000
666.00000 603.00000
448.00000 631.00000
426.00000 595.00000
428.00000 560.00000
412.00000 564.00000
381.00000 526.00000
342.00000 641.00000
346.00000 705.00000
IMAGE=CV E lab 1-19 F .jpg
ID=CVE7-19F 
LM=19
356.00000 713.00000
583.00000 722.00000
736.00000 721.00000
1070.00000 685.00000
1167.00000 629.00000
1185.00000 610.00000
1003.00000 488.00000
935.00000 523.00000
767.00000 431.00000
802.00000 364.00000
683.00000 600.00000
660.00000 625.00000
477.00000 648.00000
458.00000 616.00000
458.00000 584.00000
442.00000 586.00000
416.00000 548.00000
383.00000 658.00000
386.00000 717.00000
IMAGE=CV E lab 1-19 M .jpg
ID=CVE7-19M 
LM=19
283.00000 739.00000
534.00000 754.00000
713.00000 757.00000
1099.00000 719.00000
1204.00000 654.00000
1226.00000 633.00000
1034.00000 501.00000
954.00000 531.00000
782.00000 424.00000
827.00000 348.00000
655.00000 614.00000
630.00000 646.00000
413.00000 667.00000
395.00000 631.00000
398.00000 597.00000
377.00000 597.00000
350.00000 553.00000
311.00000 675.00000
310.00000 741.00000
IMAGE=CV E lab 1-2 F .jpg
ID=CVE7- 2F 
LM=19
332.00000 688.00000
560.00000 705.00000
718.00000 705.00000
1056.00000 672.00000
1154.00000 618.00000
1177.00000 598.00000
993.00000 473.00000
914.00000 507.00000
747.00000 412.00000
790.00000 342.00000
663.00000 573.00000
637.00000 604.00000
458.00000 627.00000
437.00000 592.00000
438.00000 556.00000
418.00000 560.00000
394.00000 519.00000
361.00000 635.00000
361.00000 693.00000
IMAGE=CV E lab 1-2 M .jpg
ID=CVE7- 2M 
LM=19
318.00000 683.00000
545.00000 698.00000
706.00000 698.00000
1066.00000 643.00000
1155.00000 580.00000
1176.00000 557.00000
985.00000 459.00000
913.00000 489.00000
751.00000 408.00000
797.00000 340.00000
651.00000 570.00000
630.00000 599.00000
439.00000 622.00000
420.00000 587.00000
420.00000 555.00000
403.00000 558.00000
379.00000 521.00000
345.00000 629.00000
348.00000 686.00000
IMAGE=CV E lab 1-20 F .jpg
ID=CVE7-20F
LM=19
335.00000 705.00000
562.00000 717.00000
717.00000 720.00000
1049.00000 679.00000
1133.00000 627.00000
1151.00000 607.00000
973.00000 494.00000
896.00000 526.00000
732.00000 438.00000
770.00000 377.00000
657.00000 599.00000
636.00000 625.00000
456.00000 646.00000
439.00000 612.00000
441.00000 579.00000
425.00000 582.00000
400.00000 544.00000
364.00000 652.00000
362.00000 709.00000
IMAGE=CV E lab 1-20 M .jpg
ID=CVE7-20M 
LM=19
305.00000 705.00000
564.00000 715.00000
742.00000 717.00000
1136.00000 671.00000
1238.00000 600.00000
1259.00000 573.00000
1048.00000 454.00000
963.00000 493.00000
794.00000 389.00000
843.00000 306.00000
685.00000 576.00000
657.00000 609.00000
447.00000 635.00000
422.00000 595.00000
421.00000 562.00000
404.00000 565.00000
377.00000 523.00000
332.00000 640.00000
336.00000 708.00000
IMAGE=CV E lab 1-21 F .jpg
ID=CVE7-21F 
LM=19
351.00000 730.00000
589.00000 737.00000
736.00000 737.00000
1071.00000 702.00000
1167.00000 644.00000
1186.00000 625.00000
1002.00000 515.00000
935.00000 547.00000
766.00000 453.00000
803.00000 384.00000
693.00000 613.00000
670.00000 642.00000
478.00000 666.00000
459.00000 632.00000
460.00000 597.00000
441.00000 599.00000
418.00000 560.00000
378.00000 673.00000
384.00000 735.00000
IMAGE=CV E lab 1-21 M .jpg
ID=CVE7-21M 
LM=19
321.00000 699.00000
568.00000 710.00000
731.00000 711.00000
1111.00000 662.00000
1207.00000 597.00000
1225.00000 579.00000
1033.00000 464.00000
963.00000 491.00000
776.00000 400.00000
828.00000 328.00000
687.00000 573.00000
662.00000 604.00000
454.00000 631.00000
430.00000 595.00000
433.00000 560.00000
414.00000 563.00000
387.00000 523.00000
349.00000 639.00000
348.00000 701.00000
IMAGE=CV E lab 1-22 F .jpg
ID=CVE7-22F 
LM=19
333.00000 715.00000
568.00000 728.00000
727.00000 726.00000
1085.00000 692.00000
1183.00000 630.00000
1204.00000 605.00000
996.00000 483.00000
917.00000 520.00000
747.00000 429.00000
788.00000 356.00000
670.00000 594.00000
644.00000 628.00000
454.00000 649.00000
435.00000 612.00000
438.00000 577.00000
418.00000 578.00000
394.00000 540.00000
359.00000 655.00000
365.00000 719.00000
IMAGE=CV E lab 1-22 M .jpg
ID=CVE7-22M 
LM=19
320.00000 709.00000
560.00000 722.00000
732.00000 721.00000
1106.00000 668.00000
1204.00000 599.00000
1222.00000 577.00000
1026.00000 463.00000
953.00000 495.00000
778.00000 401.00000
816.00000 326.00000
674.00000 584.00000
652.00000 614.00000
450.00000 642.00000
428.00000 606.00000
429.00000 573.00000
410.00000 574.00000
385.00000 534.00000
350.00000 651.00000
346.00000 711.00000
IMAGE=CV E lab 1-23 4 .jpg
ID=CVE7-24F 
LM=19
323.00000 710.00000
584.00000 718.00000
755.00000 721.00000
1138.00000 673.00000
1237.00000 607.00000
1256.00000 584.00000
1061.00000 462.00000
977.00000 500.00000
810.00000 392.00000
855.00000 318.00000
697.00000 582.00000
673.00000 611.00000
451.00000 639.00000
434.00000 602.00000
436.00000 569.00000
417.00000 571.00000
390.00000 529.00000
349.00000 647.00000
356.00000 714.00000
IMAGE=CV E lab 1-23 F .jpg
ID=CVE7-23F 
LM=19
324.00000 695.00000
566.00000 709.00000
728.00000 709.00000
1087.00000 670.00000
1182.00000 612.00000
1201.00000 591.00000
1002.00000 467.00000
927.00000 506.00000
747.00000 415.00000
797.00000 339.00000
665.00000 578.00000
637.00000 606.00000
453.00000 631.00000
430.00000 593.00000
431.00000 559.00000
414.00000 563.00000
389.00000 519.00000
348.00000 636.00000
358.00000 698.00000
IMAGE=CV E lab 1-23 M .jpg
ID=CVE7-23M 
LM=19
372.00000 712.00000
604.00000 726.00000
758.00000 724.00000
1112.00000 683.00000
1210.00000 620.00000
1230.00000 596.00000
1037.00000 478.00000
958.00000 519.00000
786.00000 428.00000
827.00000 357.00000
714.00000 595.00000
690.00000 627.00000
495.00000 650.00000
479.00000 616.00000
477.00000 580.00000
458.00000 582.00000
432.00000 543.00000
399.00000 656.00000
401.00000 717.00000
IMAGE=CV E lab 1-24 M .jpg
ID=CVE7-24M 
LM=19
350.00000 679.00000
577.00000 687.00000
731.00000 686.00000
1070.00000 646.00000
1179.00000 588.00000
1196.00000 573.00000
1013.00000 450.00000
932.00000 476.00000
782.00000 390.00000
822.00000 323.00000
676.00000 560.00000
656.00000 588.00000
465.00000 614.00000
450.00000 582.00000
454.00000 549.00000
435.00000 553.00000
413.00000 515.00000
372.00000 621.00000
379.00000 683.00000
IMAGE=CV E lab 1-25 F .jpg
ID=CVE7-25F 
LM=19
336.00000 667.00000
564.00000 678.00000
719.00000 678.00000
1070.00000 646.00000
1165.00000 588.00000
1185.00000 566.00000
997.00000 443.00000
919.00000 475.00000
751.00000 386.00000
788.00000 321.00000
682.00000 550.00000
657.00000 580.00000
462.00000 601.00000
444.00000 563.00000
445.00000 532.00000
424.00000 534.00000
403.00000 494.00000
364.00000 608.00000
365.00000 670.00000
IMAGE=CV E lab 1-25 M .jpg
ID=CVE7-25M 
LM=19
399.00000 670.00000
617.00000 677.00000
761.00000 676.00000
1076.00000 647.00000
1190.00000 586.00000
1209.00000 565.00000
1044.00000 443.00000
949.00000 474.00000
813.00000 384.00000
856.00000 321.00000
705.00000 550.00000
691.00000 578.00000
509.00000 606.00000
493.00000 573.00000
497.00000 547.00000
478.00000 546.00000
452.00000 514.00000
417.00000 617.00000
425.00000 672.00000
IMAGE=CV E lab 1-26 F .jpg
ID=CVE7-26F 
LM=19
347.00000 664.00000
587.00000 682.00000
743.00000 681.00000
1070.00000 640.00000
1164.00000 586.00000
1185.00000 562.00000
995.00000 447.00000
929.00000 477.00000
765.00000 389.00000
805.00000 318.00000
690.00000 551.00000
662.00000 581.00000
478.00000 603.00000
457.00000 564.00000
459.00000 530.00000
443.00000 530.00000
413.00000 490.00000
375.00000 608.00000
377.00000 671.00000
IMAGE=CV E lab 1-26 M .jpg
ID=CVE7-26M 
LM=19
343.00000 667.00000
566.00000 675.00000
704.00000 674.00000
1033.00000 640.00000
1136.00000 578.00000
1149.00000 564.00000
976.00000 441.00000
892.00000 478.00000
759.00000 388.00000
797.00000 322.00000
643.00000 550.00000
624.00000 575.00000
453.00000 604.00000
441.00000 570.00000
442.00000 545.00000
425.00000 545.00000
401.00000 510.00000
367.00000 611.00000
369.00000 669.00000
IMAGE=CV E lab 1-27 F .jpg
ID=CVE7-27F 
LM=19
347.00000 683.00000
564.00000 691.00000
720.00000 692.00000
1056.00000 660.00000
1154.00000 603.00000
1177.00000 581.00000
979.00000 464.00000
901.00000 500.00000
737.00000 416.00000
776.00000 346.00000
666.00000 570.00000
646.00000 598.00000
465.00000 622.00000
448.00000 588.00000
448.00000 557.00000
430.00000 559.00000
405.00000 523.00000
375.00000 631.00000
377.00000 685.00000
IMAGE=CV E lab 1-27 M .jpg
ID=CVE7-27M 
LM=19
379.00000 655.00000
606.00000 666.00000
757.00000 665.00000
1096.00000 624.00000
1204.00000 554.00000
1218.00000 538.00000
1033.00000 416.00000
946.00000 449.00000
792.00000 355.00000
834.00000 292.00000
697.00000 531.00000
674.00000 559.00000
493.00000 590.00000
476.00000 557.00000
476.00000 524.00000
459.00000 527.00000
432.00000 490.00000
402.00000 598.00000
406.00000 657.00000
IMAGE=CV E lab 1-28 F .jpg
ID=CVE7-28F 
LM=19
362.00000 713.00000
564.00000 733.00000
724.00000 732.00000
1045.00000 698.00000
1148.00000 635.00000
1169.00000 612.00000
973.00000 511.00000
904.00000 536.00000
760.00000 459.00000
797.00000 391.00000
683.00000 607.00000
657.00000 638.00000
479.00000 657.00000
463.00000 624.00000
463.00000 592.00000
446.00000 593.00000
418.00000 556.00000
392.00000 663.00000
390.00000 718.00000
IMAGE=CV E lab 1-28 M .jpg
ID=CVE7-28M 
LM=19
345.00000 639.00000
560.00000 651.00000
704.00000 650.00000
1021.00000 615.00000
1127.00000 558.00000
1146.00000 539.00000
973.00000 411.00000
891.00000 440.00000
758.00000 354.00000
799.00000 287.00000
642.00000 524.00000
627.00000 549.00000
456.00000 575.00000
441.00000 545.00000
443.00000 513.00000
424.00000 514.00000
399.00000 478.00000
366.00000 582.00000
370.00000 641.00000
IMAGE=CV E lab 1-29 F .jpg
ID=CVE7-29F 
LM=19
332.00000 707.00000
564.00000 715.00000
720.00000 710.00000
1062.00000 665.00000
1149.00000 609.00000
1173.00000 584.00000
980.00000 477.00000
907.00000 507.00000
743.00000 420.00000
784.00000 348.00000
658.00000 586.00000
638.00000 613.00000
457.00000 640.00000
440.00000 601.00000
438.00000 567.00000
419.00000 572.00000
394.00000 530.00000
355.00000 649.00000
360.00000 709.00000
IMAGE=CV E lab 1-29 M .jpg
ID=CVE7-29M 
LM=19
295.00000 724.00000
557.00000 735.00000
729.00000 738.00000
1125.00000 696.00000
1223.00000 631.00000
1245.00000 608.00000
1047.00000 487.00000
961.00000 521.00000
789.00000 417.00000
836.00000 341.00000
687.00000 601.00000
656.00000 632.00000
435.00000 655.00000
413.00000 617.00000
417.00000 582.00000
397.00000 582.00000
371.00000 541.00000
322.00000 660.00000
327.00000 728.00000
IMAGE=CV E lab 1-3 F .jpg
ID=CVE7- 3F 
LM=19
355.00000 680.00000
597.00000 688.00000
751.00000 689.00000
1095.00000 651.00000
1191.00000 593.00000
1212.00000 569.00000
1019.00000 456.00000
947.00000 491.00000
779.00000 408.00000
816.00000 331.00000
694.00000 565.00000
672.00000 594.00000
476.00000 613.00000
457.00000 579.00000
462.00000 545.00000
441.00000 547.00000
421.00000 504.00000
377.00000 622.00000
383.00000 683.00000
IMAGE=CV E lab 1-3 M .jpg
ID=CVE7- 3M 
LM=19
396.00000 642.00000
610.00000 647.00000
751.00000 643.00000
1068.00000 606.00000
1162.00000 543.00000
1177.00000 530.00000
1009.00000 416.00000
930.00000 448.00000
782.00000 367.00000
819.00000 301.00000
693.00000 524.00000
678.00000 549.00000
501.00000 580.00000
486.00000 549.00000
486.00000 521.00000
469.00000 524.00000
448.00000 488.00000
414.00000 588.00000
423.00000 643.00000
IMAGE=CV E lab 1-30 F .jpg
ID=CVE7-30F 
LM=19
436.00000 657.00000
647.00000 666.00000
767.00000 664.00000
1055.00000 629.00000
1142.00000 581.00000
1160.00000 564.00000
1004.00000 460.00000
930.00000 488.00000
790.00000 411.00000
827.00000 352.00000
713.00000 549.00000
694.00000 574.00000
536.00000 598.00000
522.00000 571.00000
525.00000 539.00000
508.00000 540.00000
486.00000 506.00000
450.00000 607.00000
465.00000 659.00000
IMAGE=CV E lab 1-30 M .jpg
ID=CVE7-30M 
LM=19
349.00000 672.00000
560.00000 676.00000
695.00000 677.00000
1021.00000 644.00000
1124.00000 584.00000
1139.00000 572.00000
963.00000 454.00000
885.00000 480.00000
747.00000 401.00000
783.00000 332.00000
642.00000 553.00000
624.00000 582.00000
456.00000 610.00000
441.00000 577.00000
444.00000 552.00000
424.00000 552.00000
403.00000 515.00000
370.00000 615.00000
378.00000 674.00000
IMAGE=CV E lab 1-31 F .jpg
ID=CVE7-31F 
LM=19
363.00000 682.00000
577.00000 688.00000
707.00000 685.00000
1025.00000 658.00000
1117.00000 608.00000
1131.00000 591.00000
969.00000 470.00000
883.00000 501.00000
733.00000 414.00000
773.00000 358.00000
658.00000 566.00000
643.00000 595.00000
478.00000 621.00000
456.00000 587.00000
458.00000 554.00000
441.00000 556.00000
416.00000 522.00000
383.00000 627.00000
388.00000 686.00000
IMAGE=CV E lab 1-31 M .jpg
ID=CVE7-31M 
LM=19
400.00000 674.00000
616.00000 682.00000
749.00000 681.00000
1060.00000 646.00000
1166.00000 575.00000
1181.00000 552.00000
1019.00000 448.00000
945.00000 480.00000
798.00000 399.00000
836.00000 337.00000
713.00000 556.00000
692.00000 584.00000
515.00000 612.00000
502.00000 583.00000
501.00000 553.00000
482.00000 555.00000
456.00000 524.00000
425.00000 623.00000
427.00000 676.00000
IMAGE=CV E lab 1-32 F .jpg
ID=CVE7-32F 
LM=19
394.00000 656.00000
602.00000 667.00000
741.00000 667.00000
1036.00000 637.00000
1131.00000 584.00000
1149.00000 564.00000
972.00000 450.00000
897.00000 482.00000
748.00000 410.00000
789.00000 341.00000
676.00000 553.00000
656.00000 576.00000
496.00000 600.00000
483.00000 569.00000
484.00000 541.00000
468.00000 545.00000
443.00000 508.00000
415.00000 606.00000
419.00000 660.00000
IMAGE=CV E lab 1-32 M .jpg
ID=CVE7-32M
LM=19
357.00000 654.00000
561.00000 662.00000
693.00000 661.00000
1007.00000 629.00000
1103.00000 573.00000
1115.00000 561.00000
962.00000 447.00000
882.00000 474.00000
741.00000 392.00000
779.00000 332.00000
653.00000 547.00000
635.00000 569.00000
460.00000 595.00000
448.00000 569.00000
452.00000 541.00000
437.00000 543.00000
411.00000 508.00000
379.00000 602.00000
387.00000 659.00000
IMAGE=CV E lab 1-33 F .jpg
ID=CVE7-33F 
LM=19
388.00000 655.00000
588.00000 665.00000
711.00000 663.00000
1006.00000 640.00000
1103.00000 595.00000
1122.00000 579.00000
963.00000 452.00000
884.00000 479.00000
742.00000 401.00000
775.00000 345.00000
663.00000 542.00000
648.00000 571.00000
493.00000 595.00000
477.00000 565.00000
477.00000 535.00000
460.00000 536.00000
439.00000 501.00000
409.00000 604.00000
413.00000 659.00000
IMAGE=CV E lab 1-33 M .jpg
ID=CVE7-33M 
LM=19
353.00000 643.00000
598.00000 656.00000
766.00000 656.00000
1135.00000 595.00000
1219.00000 532.00000
1235.00000 518.00000
1051.00000 406.00000
974.00000 444.00000
803.00000 349.00000
840.00000 279.00000
721.00000 522.00000
698.00000 552.00000
481.00000 578.00000
464.00000 541.00000
461.00000 513.00000
443.00000 513.00000
419.00000 474.00000
379.00000 582.00000
385.00000 644.00000
IMAGE=CV E lab 1-34 F .jpg
ID=CVE7-34F 
LM=19
442.00000 687.00000
641.00000 689.00000
778.00000 687.00000
1064.00000 650.00000
1160.00000 588.00000
1177.00000 571.00000
1002.00000 461.00000
933.00000 493.00000
777.00000 424.00000
816.00000 357.00000
706.00000 571.00000
687.00000 599.00000
538.00000 627.00000
524.00000 592.00000
526.00000 561.00000
506.00000 564.00000
480.00000 532.00000
458.00000 633.00000
470.00000 689.00000
IMAGE=CV E lab 1-34 M .jpg
ID=CVE7-34M 
LM=19
363.00000 683.00000
596.00000 696.00000
764.00000 692.00000
1109.00000 636.00000
1198.00000 574.00000
1212.00000 557.00000
1026.00000 442.00000
963.00000 474.00000
796.00000 387.00000
837.00000 319.00000
711.00000 560.00000
690.00000 589.00000
485.00000 617.00000
463.00000 582.00000
466.00000 553.00000
446.00000 553.00000
424.00000 516.00000
390.00000 625.00000
389.00000 686.00000
IMAGE=CV E lab 1-35 F .jpg
ID=CVE7-35F 
LM=19
390.00000 638.00000
579.00000 644.00000
704.00000 641.00000
993.00000 610.00000
1083.00000 563.00000
1093.00000 552.00000
942.00000 444.00000
876.00000 471.00000
737.00000 397.00000
773.00000 341.00000
658.00000 534.00000
639.00000 555.00000
491.00000 580.00000
477.00000 551.00000
477.00000 525.00000
461.00000 525.00000
440.00000 493.00000
410.00000 588.00000
415.00000 640.00000
IMAGE=CV E lab 1-35 M .jpg
ID=CVE7-35M 
LM=19
305.00000 719.00000
555.00000 726.00000
718.00000 724.00000
1109.00000 685.00000
1208.00000 614.00000
1230.00000 586.00000
1029.00000 478.00000
952.00000 514.00000
784.00000 409.00000
832.00000 338.00000
674.00000 594.00000
652.00000 624.00000
434.00000 651.00000
416.00000 617.00000
417.00000 584.00000
399.00000 586.00000
375.00000 544.00000
338.00000 658.00000
338.00000 722.00000
IMAGE=CV E lab 1-36 F .jpg
ID=CVE7-36F 
LM=19
411.00000 646.00000
602.00000 650.00000
710.00000 648.00000
1001.00000 621.00000
1088.00000 572.00000
1101.00000 560.00000
952.00000 447.00000
882.00000 469.00000
746.00000 400.00000
777.00000 342.00000
667.00000 537.00000
654.00000 559.00000
517.00000 586.00000
497.00000 558.00000
499.00000 530.00000
483.00000 533.00000
459.00000 496.00000
435.00000 592.00000
434.00000 648.00000
IMAGE=CV E lab 1-36 M .jpg
ID=CVE7-36M 
LM=19
370.00000 698.00000
609.00000 713.00000
773.00000 704.00000
1126.00000 640.00000
1210.00000 569.00000
1224.00000 549.00000
1040.00000 448.00000
962.00000 489.00000
794.00000 402.00000
834.00000 328.00000
716.00000 569.00000
692.00000 605.00000
489.00000 632.00000
469.00000 601.00000
469.00000 568.00000
452.00000 571.00000
429.00000 531.00000
397.00000 640.00000
397.00000 700.00000
IMAGE=CV E lab 1-37 F .jpg
ID=CVE7-37F 
LM=19
381.00000 640.00000
583.00000 649.00000
702.00000 647.00000
992.00000 621.00000
1081.00000 573.00000
1102.00000 555.00000
945.00000 442.00000
877.00000 468.00000
735.00000 387.00000
770.00000 328.00000
655.00000 536.00000
638.00000 562.00000
477.00000 584.00000
467.00000 554.00000
468.00000 523.00000
451.00000 523.00000
428.00000 490.00000
399.00000 590.00000
407.00000 644.00000
IMAGE=CV E lab 1-37 M .jpg
ID=CVE7-37M 
LM=19
338.00000 668.00000
581.00000 683.00000
759.00000 680.00000
1125.00000 618.00000
1217.00000 550.00000
1240.00000 526.00000
1027.00000 420.00000
954.00000 452.00000
788.00000 362.00000
830.00000 285.00000
703.00000 541.00000
678.00000 575.00000
473.00000 603.00000
446.00000 569.00000
446.00000 532.00000
429.00000 536.00000
400.00000 496.00000
366.00000 609.00000
370.00000 672.00000
IMAGE=CV E lab 1-38 F .jpg
ID=CVE7-38F 
LM=19
409.00000 683.00000
642.00000 691.00000
800.00000 685.00000
1135.00000 632.00000
1218.00000 577.00000
1237.00000 554.00000
1047.00000 450.00000
971.00000 489.00000
804.00000 405.00000
847.00000 341.00000
732.00000 566.00000
712.00000 592.00000
529.00000 618.00000
507.00000 585.00000
509.00000 553.00000
490.00000 555.00000
466.00000 519.00000
430.00000 629.00000
443.00000 687.00000
IMAGE=CV E lab 1-38 M .jpg
ID=CVE7-38M 
LM=19
304.00000 659.00000
555.00000 666.00000
728.00000 664.00000
1106.00000 610.00000
1201.00000 540.00000
1217.00000 519.00000
1012.00000 401.00000
935.00000 442.00000
758.00000 352.00000
804.00000 274.00000
682.00000 531.00000
657.00000 564.00000
440.00000 593.00000
417.00000 557.00000
420.00000 522.00000
398.00000 522.00000
372.00000 483.00000
330.00000 598.00000
337.00000 660.00000
IMAGE=CV E lab 1-39 F .jpg
ID=CVE7-39F 
LM=19
337.00000 703.00000
570.00000 708.00000
723.00000 705.00000
1061.00000 660.00000
1157.00000 602.00000
1178.00000 578.00000
981.00000 468.00000
900.00000 507.00000
731.00000 420.00000
774.00000 356.00000
676.00000 579.00000
651.00000 611.00000
457.00000 637.00000
441.00000 602.00000
438.00000 569.00000
419.00000 570.00000
392.00000 537.00000
359.00000 648.00000
365.00000 706.00000
IMAGE=CV E lab 1-39 M .jpg
ID=CVE7-39M 
LM=19
337.00000 708.00000
577.00000 719.00000
736.00000 720.00000
1099.00000 682.00000
1199.00000 616.00000
1217.00000 595.00000
1030.00000 466.00000
954.00000 504.00000
794.00000 395.00000
839.00000 329.00000
688.00000 585.00000
662.00000 616.00000
464.00000 641.00000
445.00000 605.00000
447.00000 572.00000
426.00000 573.00000
399.00000 537.00000
363.00000 650.00000
366.00000 711.00000
IMAGE=CV E lab 1-4 F .jpg
ID=CVE7- 4F
LM=19
343.00000 713.00000
576.00000 725.00000
729.00000 726.00000
1075.00000 692.00000
1169.00000 639.00000
1190.00000 618.00000
998.00000 496.00000
917.00000 534.00000
750.00000 439.00000
799.00000 365.00000
671.00000 599.00000
645.00000 629.00000
467.00000 650.00000
448.00000 614.00000
450.00000 580.00000
430.00000 581.00000
405.00000 541.00000
369.00000 659.00000
370.00000 717.00000
IMAGE=CV E lab 1-4 M .jpg
ID=CVE7- 4M 
LM=19
350.00000 652.00000
594.00000 661.00000
759.00000 659.00000
1127.00000 603.00000
1225.00000 528.00000
1242.00000 503.00000
1027.00000 398.00000
961.00000 434.00000
791.00000 344.00000
838.00000 269.00000
702.00000 525.00000
678.00000 553.00000
473.00000 585.00000
455.00000 551.00000
458.00000 517.00000
441.00000 520.00000
411.00000 485.00000
379.00000 596.00000
377.00000 655.00000
IMAGE=CV E lab 1-40 F .jpg
ID=CVE7-40F 
LM=19
330.00000 718.00000
580.00000 724.00000
741.00000 724.00000
1118.00000 674.00000
1211.00000 603.00000
1229.00000 579.00000
1025.00000 471.00000
942.00000 510.00000
784.00000 413.00000
827.00000 341.00000
691.00000 592.00000
669.00000 623.00000
457.00000 649.00000
440.00000 613.00000
441.00000 582.00000
420.00000 585.00000
395.00000 548.00000
356.00000 658.00000
358.00000 720.00000
IMAGE=CV E lab 1-41 F .jpg
ID=CVE7-41F  
LM=19
371.00000 673.00000
592.00000 685.00000
742.00000 681.00000
1062.00000 637.00000
1149.00000 586.00000
1172.00000 561.00000
982.00000 455.00000
909.00000 491.00000
750.00000 406.00000
792.00000 342.00000
686.00000 559.00000
662.00000 588.00000
483.00000 615.00000
468.00000 582.00000
465.00000 550.00000
449.00000 552.00000
425.00000 514.00000
394.00000 623.00000
398.00000 679.00000
IMAGE=CV E lab 1-41 M .jpg
ID=CVE7-41M 
LM=19
375.00000 679.00000
611.00000 694.00000
778.00000 691.00000
1136.00000 628.00000
1223.00000 567.00000
1235.00000 550.00000
1051.00000 436.00000
971.00000 473.00000
806.00000 381.00000
851.00000 311.00000
731.00000 552.00000
705.00000 585.00000
500.00000 616.00000
479.00000 583.00000
478.00000 550.00000
462.00000 552.00000
440.00000 512.00000
418.00000 622.00000
404.00000 682.00000
IMAGE=CV E lab 1-42 F .jpg
ID=CVE7-42F 
LM=19
353.00000 670.00000
569.00000 676.00000
718.00000 678.00000
1060.00000 640.00000
1148.00000 585.00000
1166.00000 568.00000
977.00000 455.00000
901.00000 489.00000
740.00000 401.00000
782.00000 332.00000
672.00000 557.00000
649.00000 584.00000
465.00000 606.00000
453.00000 570.00000
453.00000 542.00000
435.00000 542.00000
413.00000 505.00000
376.00000 614.00000
379.00000 673.00000
IMAGE=CV E lab 1-42 M .jpg
ID=CVE7-42M 
LM=19
363.00000 696.00000
599.00000 707.00000
761.00000 702.00000
1121.00000 642.00000
1208.00000 580.00000
1222.00000 564.00000
1032.00000 464.00000
949.00000 500.00000
795.00000 412.00000
838.00000 342.00000
717.00000 577.00000
692.00000 601.00000
482.00000 630.00000
467.00000 599.00000
467.00000 568.00000
448.00000 570.00000
425.00000 530.00000
390.00000 639.00000
391.00000 700.00000
IMAGE=CV E lab 1-43 F .jpg
ID=CVE7-43F 
LM=19
394.00000 649.00000
584.00000 657.00000
728.00000 654.00000
1024.00000 616.00000
1102.00000 565.00000
1120.00000 544.00000
956.00000 441.00000
887.00000 474.00000
739.00000 401.00000
774.00000 342.00000
678.00000 541.00000
658.00000 569.00000
493.00000 592.00000
478.00000 560.00000
478.00000 531.00000
464.00000 533.00000
443.00000 498.00000
419.00000 596.00000
421.00000 651.00000
IMAGE=CV E lab 1-43 M .jpg
ID=CVE7-43M 
LM=19
327.00000 747.00000
564.00000 758.00000
733.00000 755.00000
1100.00000 703.00000
1194.00000 638.00000
1209.00000 622.00000
1018.00000 503.00000
949.00000 538.00000
768.00000 443.00000
810.00000 375.00000
691.00000 619.00000
667.00000 651.00000
459.00000 681.00000
435.00000 644.00000
434.00000 613.00000
415.00000 613.00000
389.00000 577.00000
363.00000 688.00000
359.00000 750.00000
IMAGE=CV E lab 1-44 F .jpg
ID=CVE7-44F 
LM=19
364.00000 647.00000
592.00000 659.00000
741.00000 655.00000
1077.00000 604.00000
1153.00000 551.00000
1169.00000 532.00000
989.00000 433.00000
922.00000 468.00000
755.00000 381.00000
792.00000 319.00000
688.00000 536.00000
667.00000 562.00000
484.00000 585.00000
463.00000 552.00000
465.00000 519.00000
449.00000 521.00000
424.00000 486.00000
390.00000 592.00000
393.00000 651.00000
IMAGE=CV E lab 1-44 M .jpg
ID=CVE7-44M 
LM=19
342.00000 704.00000
581.00000 715.00000
754.00000 716.00000
1094.00000 672.00000
1191.00000 605.00000
1211.00000 581.00000
1022.00000 464.00000
949.00000 500.00000
798.00000 413.00000
836.00000 340.00000
679.00000 583.00000
656.00000 614.00000
465.00000 642.00000
450.00000 605.00000
452.00000 573.00000
432.00000 575.00000
409.00000 536.00000
366.00000 648.00000
369.00000 708.00000
IMAGE=CV E lab 1-45 F .jpg
ID=CVE7-45F 
LM=19
379.00000 690.00000
624.00000 709.00000
780.00000 706.00000
1135.00000 653.00000
1218.00000 595.00000
1236.00000 574.00000
1037.00000 465.00000
960.00000 504.00000
795.00000 408.00000
840.00000 340.00000
729.00000 569.00000
702.00000 603.00000
506.00000 625.00000
484.00000 587.00000
486.00000 554.00000
467.00000 554.00000
439.00000 513.00000
407.00000 629.00000
409.00000 694.00000
IMAGE=CV E lab 1-45 M .jpg
ID=CVE7-45M 
LM=19
355.00000 689.00000
590.00000 696.00000
760.00000 696.00000
1112.00000 651.00000
1204.00000 585.00000
1221.00000 565.00000
1029.00000 450.00000
954.00000 487.00000
784.00000 405.00000
823.00000 327.00000
702.00000 569.00000
684.00000 596.00000
472.00000 626.00000
458.00000 591.00000
458.00000 561.00000
441.00000 564.00000
414.00000 527.00000
374.00000 635.00000
394.00000 692.00000
IMAGE=CV E lab 1-46 F .jpg
ID=CVE7-46F 
LM=19
384.00000 680.00000
610.00000 687.00000
759.00000 684.00000
1087.00000 639.00000
1172.00000 584.00000
1189.00000 562.00000
1008.00000 458.00000
930.00000 496.00000
763.00000 411.00000
799.00000 348.00000
717.00000 566.00000
698.00000 591.00000
500.00000 620.00000
484.00000 585.00000
484.00000 553.00000
466.00000 554.00000
441.00000 519.00000
408.00000 628.00000
418.00000 682.00000
IMAGE=CV E lab 1-46 M .jpg
ID=CVE7-46M 
LM=19
342.00000 668.00000
572.00000 679.00000
739.00000 675.00000
1077.00000 618.00000
1166.00000 555.00000
1179.00000 540.00000
1002.00000 435.00000
922.00000 468.00000
765.00000 391.00000
810.00000 316.00000
680.00000 552.00000
660.00000 577.00000
456.00000 603.00000
444.00000 570.00000
447.00000 541.00000
429.00000 545.00000
401.00000 507.00000
366.00000 611.00000
377.00000 672.00000
IMAGE=CV E lab 1-47 F .jpg
ID=CVE71-47F 
LM=19
356.00000 671.00000
592.00000 685.00000
743.00000 683.00000
1076.00000 642.00000
1174.00000 578.00000
1195.00000 553.00000
1000.00000 442.00000
924.00000 480.00000
748.00000 394.00000
790.00000 327.00000
704.00000 551.00000
676.00000 584.00000
479.00000 606.00000
465.00000 572.00000
463.00000 538.00000
446.00000 540.00000
416.00000 504.00000
381.00000 617.00000
385.00000 675.00000
IMAGE=CV E lab 1-47 M .jpg
ID=CVE7-47M 
LM=19
398.00000 711.00000
637.00000 719.00000
793.00000 713.00000
1167.00000 654.00000
1255.00000 588.00000
1266.00000 575.00000
1074.00000 458.00000
1000.00000 494.00000
837.00000 402.00000
876.00000 331.00000
756.00000 577.00000
733.00000 607.00000
525.00000 641.00000
502.00000 604.00000
501.00000 572.00000
481.00000 574.00000
454.00000 536.00000
419.00000 650.00000
429.00000 714.00000
IMAGE=CV E lab 1-48 F .jpg
ID=CVE7-48F 
LM=19
394.00000 660.00000
624.00000 673.00000
782.00000 673.00000
1123.00000 631.00000
1203.00000 576.00000
1220.00000 554.00000
1035.00000 447.00000
956.00000 485.00000
791.00000 398.00000
832.00000 333.00000
724.00000 550.00000
699.00000 577.00000
512.00000 597.00000
495.00000 563.00000
496.00000 529.00000
479.00000 532.00000
454.00000 494.00000
415.00000 605.00000
427.00000 665.00000
IMAGE=CV E lab 1-48 M .jpg
ID=CVE7-48M 
LM=19
329.00000 687.00000
570.00000 698.00000
733.00000 696.00000
1103.00000 648.00000
1201.00000 581.00000
1217.00000 562.00000
1016.00000 439.00000
936.00000 473.00000
772.00000 381.00000
816.00000 304.00000
672.00000 562.00000
648.00000 590.00000
452.00000 619.00000
432.00000 584.00000
435.00000 549.00000
415.00000 549.00000
386.00000 513.00000
354.00000 625.00000
357.00000 690.00000
IMAGE=CV E lab 1-49 F .jpg
ID=CVE7-49F 
LM=19
408.00000 660.00000
630.00000 667.00000
781.00000 665.00000
1110.00000 622.00000
1201.00000 562.00000
1221.00000 540.00000
1030.00000 436.00000
953.00000 473.00000
789.00000 392.00000
837.00000 322.00000
727.00000 547.00000
704.00000 577.00000
526.00000 599.00000
504.00000 565.00000
504.00000 533.00000
487.00000 537.00000
466.00000 497.00000
430.00000 606.00000
438.00000 663.00000
IMAGE=CV E lab 1-49 M .jpg
ID=CVE7-49M  
LM=19
296.00000 696.00000
553.00000 709.00000
719.00000 709.00000
1126.00000 657.00000
1224.00000 582.00000
1239.00000 559.00000
1040.00000 439.00000
953.00000 482.00000
785.00000 373.00000
836.00000 295.00000
663.00000 568.00000
639.00000 600.00000
428.00000 625.00000
406.00000 592.00000
407.00000 557.00000
387.00000 558.00000
361.00000 515.00000
329.00000 633.00000
328.00000 699.00000
IMAGE=CV E lab 1-5 F .jpg
ID=CVE7- 5F 
LM=19
333.00000 705.00000
571.00000 720.00000
736.00000 720.00000
1083.00000 685.00000
1179.00000 630.00000
1200.00000 606.00000
1011.00000 487.00000
930.00000 523.00000
758.00000 427.00000
799.00000 358.00000
674.00000 594.00000
645.00000 623.00000
458.00000 643.00000
435.00000 605.00000
441.00000 573.00000
423.00000 573.00000
400.00000 534.00000
358.00000 647.00000
363.00000 710.00000
IMAGE=CV E lab 1-5 M .jpg
ID=CVE7- 5M  
LM=19
375.00000 666.00000
598.00000 677.00000
731.00000 675.00000
1053.00000 633.00000
1152.00000 572.00000
1167.00000 554.00000
998.00000 453.00000
922.00000 478.00000
779.00000 396.00000
815.00000 331.00000
683.00000 552.00000
667.00000 577.00000
491.00000 603.00000
475.00000 568.00000
479.00000 541.00000
461.00000 542.00000
435.00000 507.00000
396.00000 611.00000
407.00000 667.00000
IMAGE=CV E lab 1-50 F .jpg
ID=CVE7-50F 
LM=19
417.00000 696.00000
640.00000 704.00000
795.00000 701.00000
1125.00000 650.00000
1208.00000 597.00000
1225.00000 580.00000
1035.00000 471.00000
959.00000 506.00000
799.00000 432.00000
838.00000 360.00000
746.00000 578.00000
723.00000 611.00000
533.00000 634.00000
516.00000 601.00000
515.00000 570.00000
497.00000 573.00000
475.00000 536.00000
445.00000 643.00000
447.00000 698.00000
IMAGE=CV E lab 1-50 M .jpg
ID=CVE7-50M 
LM=19
359.00000 675.00000
585.00000 689.00000
743.00000 688.00000
1080.00000 640.00000
1165.00000 584.00000
1185.00000 560.00000
992.00000 459.00000
914.00000 496.00000
754.00000 414.00000
795.00000 349.00000
689.00000 567.00000
666.00000 594.00000
481.00000 616.00000
460.00000 584.00000
461.00000 549.00000
443.00000 552.00000
418.00000 516.00000
384.00000 623.00000
388.00000 678.00000
IMAGE=CV E lab 1-52 M .jpg
ID=CVE7-52M 
LM=19
300.00000 707.00000
554.00000 720.00000
715.00000 721.00000
1086.00000 689.00000
1186.00000 621.00000
1207.00000 597.00000
1020.00000 472.00000
946.00000 506.00000
773.00000 395.00000
818.00000 319.00000
673.00000 581.00000
646.00000 612.00000
438.00000 640.00000
417.00000 603.00000
416.00000 569.00000
394.00000 571.00000
369.00000 526.00000
330.00000 645.00000
329.00000 709.00000
IMAGE=CV E lab 1-6 F .jpg
ID=CVE7- 6F 
LM=19
331.00000 700.00000
575.00000 713.00000
717.00000 710.00000
1060.00000 674.00000
1154.00000 609.00000
1174.00000 591.00000
987.00000 473.00000
917.00000 506.00000
745.00000 409.00000
790.00000 340.00000
692.00000 575.00000
663.00000 607.00000
467.00000 631.00000
446.00000 593.00000
448.00000 554.00000
430.00000 556.00000
397.00000 516.00000
353.00000 639.00000
361.00000 704.00000
IMAGE=CV E lab 1-6 M .jpg
ID=CVE7- 6M 
LM=19
325.00000 681.00000
565.00000 693.00000
721.00000 694.00000
1086.00000 654.00000
1181.00000 585.00000
1202.00000 558.00000
1019.00000 449.00000
940.00000 489.00000
790.00000 380.00000
838.00000 314.00000
673.00000 564.00000
647.00000 592.00000
449.00000 618.00000
430.00000 583.00000
431.00000 549.00000
410.00000 554.00000
390.00000 516.00000
353.00000 625.00000
353.00000 684.00000
IMAGE=CV E lab 1-7 F .jpg
ID=CVE7- 7F 
LM=19
346.00000 695.00000
574.00000 705.00000
740.00000 703.00000
1088.00000 664.00000
1188.00000 605.00000
1210.00000 582.00000
1005.00000 469.00000
926.00000 502.00000
758.00000 411.00000
796.00000 342.00000
693.00000 578.00000
667.00000 606.00000
474.00000 629.00000
453.00000 594.00000
458.00000 559.00000
437.00000 561.00000
411.00000 521.00000
374.00000 637.00000
378.00000 698.00000
IMAGE=CV E lab 1-7 M .jpg
ID=CVE7- 7M 
LM=19
320.00000 713.00000
574.00000 725.00000
749.00000 720.00000
1122.00000 670.00000
1230.00000 598.00000
1250.00000 573.00000
1049.00000 455.00000
964.00000 489.00000
790.00000 383.00000
835.00000 304.00000
691.00000 571.00000
664.00000 603.00000
453.00000 634.00000
432.00000 597.00000
433.00000 562.00000
411.00000 564.00000
380.00000 522.00000
345.00000 646.00000
350.00000 715.00000
IMAGE=CV E lab 1-8 F .jpg
ID=CVE7- 8F
LM=19
354.00000 689.00000
593.00000 705.00000
747.00000 705.00000
1092.00000 669.00000
1190.00000 607.00000
1210.00000 588.00000
1017.00000 470.00000
941.00000 505.00000
771.00000 416.00000
815.00000 349.00000
702.00000 578.00000
676.00000 607.00000
483.00000 629.00000
461.00000 592.00000
463.00000 557.00000
443.00000 559.00000
418.00000 518.00000
378.00000 634.00000
383.00000 694.00000
IMAGE=CV E lab 1-8 M .jpg
ID=CVE7- 8M 
LM=19
320.00000 700.00000
582.00000 712.00000
752.00000 711.00000
1140.00000 659.00000
1238.00000 586.00000
1260.00000 562.00000
1048.00000 443.00000
972.00000 482.00000
803.00000 386.00000
845.00000 301.00000
709.00000 573.00000
682.00000 606.00000
459.00000 630.00000
437.00000 592.00000
440.00000 555.00000
420.00000 557.00000
390.00000 517.00000
345.00000 637.00000
348.00000 704.00000
IMAGE=CV E lab 1-9 F .jpg
ID=CVE7- 9F
LM=19
369.00000 718.00000
600.00000 726.00000
749.00000 721.00000
1095.00000 686.00000
1190.00000 623.00000
1212.00000 597.00000
1019.00000 491.00000
942.00000 528.00000
779.00000 439.00000
818.00000 367.00000
711.00000 597.00000
686.00000 629.00000
495.00000 651.00000
476.00000 617.00000
478.00000 583.00000
457.00000 583.00000
431.00000 544.00000
392.00000 660.00000
400.00000 722.00000
IMAGE=CV E lab 1-9 M .jpg
ID=CVE7- 9M 
LM=19
339.00000 671.00000
543.00000 687.00000
685.00000 689.00000
1006.00000 648.00000
1088.00000 582.00000
1102.00000 558.00000
948.00000 480.00000
876.00000 510.00000
735.00000 421.00000
775.00000 360.00000
648.00000 569.00000
628.00000 597.00000
453.00000 616.00000
440.00000 583.00000
444.00000 552.00000
425.00000 556.00000
410.00000 524.00000
368.00000 620.00000
364.00000 677.00000
IMAGE=CVE2Field10F.jpg
ID=CVE5-10F 
LM=19
323.00000 705.00000
560.00000 711.00000
716.00000 707.00000
1062.00000 653.00000
1153.00000 573.00000
1163.00000 552.00000
989.00000 468.00000
914.00000 509.00000
767.00000 413.00000
802.00000 342.00000
678.00000 588.00000
657.00000 611.00000
445.00000 641.00000
429.00000 609.00000
432.00000 582.00000
415.00000 584.00000
398.00000 545.00000
353.00000 648.00000
357.00000 709.00000
IMAGE=CVE2Field11F.jpg
ID=CVE5-11F 
LM=19
333.00000 663.00000
572.00000 669.00000
721.00000 667.00000
1083.00000 614.00000
1177.00000 545.00000
1193.00000 519.00000
999.00000 425.00000
925.00000 459.00000
772.00000 372.00000
808.00000 293.00000
682.00000 541.00000
659.00000 570.00000
461.00000 599.00000
441.00000 565.00000
445.00000 534.00000
427.00000 536.00000
404.00000 497.00000
364.00000 605.00000
356.00000 665.00000
IMAGE=CVE2Field12F.jpg
ID=CVE5-12F 
LM=19
369.00000 715.00000
616.00000 727.00000
780.00000 727.00000
1139.00000 685.00000
1244.00000 600.00000
1262.00000 572.00000
1046.00000 475.00000
967.00000 515.00000
821.00000 427.00000
869.00000 348.00000
752.00000 589.00000
728.00000 622.00000
507.00000 649.00000
483.00000 615.00000
486.00000 583.00000
468.00000 585.00000
444.00000 547.00000
400.00000 656.00000
397.00000 719.00000
IMAGE=CVE2Field13F.jpg
ID=CVE5-13F 
LM=19
329.00000 644.00000
563.00000 655.00000
725.00000 658.00000
1081.00000 609.00000
1177.00000 536.00000
1191.00000 511.00000
1006.00000 422.00000
932.00000 450.00000
778.00000 362.00000
819.00000 297.00000
687.00000 534.00000
665.00000 562.00000
460.00000 582.00000
440.00000 549.00000
443.00000 521.00000
424.00000 519.00000
402.00000 484.00000
352.00000 589.00000
357.00000 646.00000
IMAGE=CVE2Field14F.jpg
ID=CVE5-14F 
LM=19
396.00000 670.00000
596.00000 678.00000
742.00000 678.00000
1039.00000 637.00000
1129.00000 571.00000
1142.00000 549.00000
974.00000 474.00000
912.00000 507.00000
786.00000 426.00000
822.00000 368.00000
694.00000 573.00000
675.00000 596.00000
511.00000 613.00000
491.00000 591.00000
494.00000 563.00000
478.00000 565.00000
460.00000 529.00000
419.00000 620.00000
423.00000 672.00000
IMAGE=CVE2Field15F.jpg
ID=CVE5-15F 
LM=19
332.00000 632.00000
563.00000 646.00000
725.00000 649.00000
1063.00000 610.00000
1166.00000 548.00000
1184.00000 528.00000
998.00000 414.00000
921.00000 446.00000
740.00000 357.00000
781.00000 289.00000
681.00000 513.00000
664.00000 550.00000
458.00000 573.00000
431.00000 536.00000
440.00000 503.00000
421.00000 503.00000
398.00000 465.00000
353.00000 576.00000
359.00000 636.00000
IMAGE=CVE2Field16M.jpg
ID=CVE5-16M 
LM=19
340.00000 626.00000
580.00000 638.00000
749.00000 634.00000
1116.00000 574.00000
1214.00000 500.00000
1233.00000 477.00000
1036.00000 393.00000
961.00000 427.00000
799.00000 336.00000
839.00000 282.00000
697.00000 503.00000
675.00000 532.00000
469.00000 559.00000
449.00000 525.00000
458.00000 495.00000
438.00000 496.00000
414.00000 457.00000
373.00000 566.00000
371.00000 629.00000
IMAGE=CVE2Field17F.jpg
ID=CVE5-17F 
LM=19
318.00000 702.00000
577.00000 713.00000
739.00000 715.00000
1105.00000 666.00000
1203.00000 586.00000
1218.00000 561.00000
1013.00000 459.00000
926.00000 496.00000
777.00000 409.00000
819.00000 323.00000
693.00000 579.00000
670.00000 612.00000
462.00000 637.00000
434.00000 603.00000
441.00000 572.00000
425.00000 573.00000
402.00000 531.00000
349.00000 641.00000
351.00000 705.00000
IMAGE=CVE2Field18F.jpg
ID=CVE5-18F 
LM=19
331.00000 674.00000
568.00000 691.00000
727.00000 692.00000
1101.00000 638.00000
1185.00000 574.00000
1202.00000 551.00000
1019.00000 465.00000
932.00000 500.00000
782.00000 396.00000
822.00000 334.00000
690.00000 564.00000
667.00000 595.00000
463.00000 614.00000
441.00000 580.00000
448.00000 551.00000
431.00000 552.00000
410.00000 510.00000
361.00000 616.00000
362.00000 677.00000
IMAGE=CVE2Field19F.jpg
ID=CVE5-19F 
LM=19
391.00000 665.00000
588.00000 674.00000
720.00000 675.00000
1026.00000 634.00000
1110.00000 574.00000
1125.00000 557.00000
954.00000 475.00000
887.00000 506.00000
767.00000 426.00000
809.00000 367.00000
687.00000 566.00000
668.00000 591.00000
495.00000 611.00000
480.00000 584.00000
485.00000 560.00000
469.00000 562.00000
450.00000 531.00000
414.00000 618.00000
414.00000 668.00000
IMAGE=CVE2Field1F.jpg
ID=CVE5- 1F 
LM=19
316.00000 666.00000
538.00000 676.00000
706.00000 678.00000
1079.00000 633.00000
1184.00000 553.00000
1198.00000 528.00000
1005.00000 428.00000
932.00000 462.00000
773.00000 371.00000
810.00000 297.00000
693.00000 545.00000
669.00000 573.00000
448.00000 601.00000
424.00000 569.00000
433.00000 539.00000
413.00000 536.00000
394.00000 495.00000
346.00000 608.00000
343.00000 668.00000
IMAGE=CVE2Field20F.jpg
ID=CVE5-20F 
LM=19
342.00000 679.00000
555.00000 696.00000
704.00000 700.00000
1042.00000 660.00000
1138.00000 590.00000
1155.00000 569.00000
970.00000 478.00000
890.00000 513.00000
741.00000 427.00000
788.00000 351.00000
667.00000 577.00000
650.00000 610.00000
456.00000 627.00000
435.00000 596.00000
443.00000 569.00000
426.00000 570.00000
405.00000 536.00000
364.00000 630.00000
365.00000 684.00000
IMAGE=CVE2Field2F.jpg
ID=CVE5- 2F 
LM=19
392.00000 649.00000
603.00000 664.00000
747.00000 666.00000
1061.00000 621.00000
1135.00000 540.00000
1143.00000 520.00000
997.00000 476.00000
937.00000 502.00000
805.00000 416.00000
845.00000 351.00000
713.00000 558.00000
695.00000 582.00000
507.00000 590.00000
485.00000 566.00000
491.00000 540.00000
474.00000 541.00000
455.00000 506.00000
412.00000 596.00000
416.00000 653.00000
IMAGE=CVE2Field3F.jpg
ID=CVE5- 3F  
LM=19
331.00000 665.00000
536.00000 679.00000
666.00000 677.00000
977.00000 645.00000
1073.00000 575.00000
1081.00000 560.00000
911.00000 467.00000
843.00000 498.00000
714.00000 417.00000
750.00000 358.00000
656.00000 560.00000
636.00000 591.00000
440.00000 611.00000
425.00000 582.00000
429.00000 554.00000
413.00000 555.00000
391.00000 523.00000
355.00000 616.00000
355.00000 669.00000
IMAGE=CVE2Field4F.jpg
ID=CVE5- 4F 
LM=19
267.00000 688.00000
546.00000 704.00000
718.00000 703.00000
1117.00000 642.00000
1215.00000 555.00000
1229.00000 521.00000
1027.00000 434.00000
937.00000 481.00000
776.00000 374.00000
842.00000 286.00000
706.00000 554.00000
679.00000 594.00000
423.00000 617.00000
399.00000 577.00000
407.00000 542.00000
387.00000 540.00000
359.00000 498.00000
300.00000 622.00000
297.00000 691.00000
IMAGE=CVE2Field5F.jpg
ID=CVE5- 5F 
LM=19
360.00000 655.00000
585.00000 667.00000
728.00000 668.00000
1041.00000 636.00000
1131.00000 576.00000
1142.00000 553.00000
969.00000 468.00000
900.00000 495.00000
738.00000 408.00000
776.00000 343.00000
705.00000 554.00000
683.00000 581.00000
481.00000 593.00000
459.00000 560.00000
465.00000 529.00000
448.00000 531.00000
424.00000 491.00000
383.00000 596.00000
389.00000 657.00000
IMAGE=CVE2Field6M.jpg
ID=CVE5- 6M 
LM=19
366.00000 669.00000
601.00000 692.00000
752.00000 692.00000
1111.00000 643.00000
1208.00000 561.00000
1217.00000 540.00000
1029.00000 450.00000
957.00000 484.00000
807.00000 387.00000
860.00000 320.00000
712.00000 553.00000
688.00000 584.00000
489.00000 609.00000
470.00000 573.00000
475.00000 545.00000
459.00000 545.00000
435.00000 510.00000
395.00000 615.00000
393.00000 676.00000
IMAGE=CVE2Field7F.jpg
ID=CVE5- 7F 
LM=19
402.00000 645.00000
599.00000 658.00000
732.00000 660.00000
1023.00000 632.00000
1112.00000 567.00000
1125.00000 547.00000
963.00000 459.00000
907.00000 482.00000
769.00000 407.00000
803.00000 354.00000
706.00000 550.00000
692.00000 575.00000
513.00000 592.00000
495.00000 563.00000
497.00000 537.00000
482.00000 541.00000
461.00000 507.00000
427.00000 596.00000
429.00000 647.00000
IMAGE=CVE2Field8F.jpg
ID=CVE5- 8F 
LM=19
373.00000 706.00000
590.00000 715.00000
733.00000 714.00000
1090.00000 683.00000
1196.00000 616.00000
1208.00000 600.00000
1023.00000 495.00000
948.00000 533.00000
804.00000 436.00000
840.00000 367.00000
726.00000 593.00000
704.00000 623.00000
494.00000 644.00000
473.00000 616.00000
478.00000 588.00000
459.00000 586.00000
438.00000 552.00000
395.00000 652.00000
401.00000 709.00000
IMAGE=CVE2Field9F.jpg
ID=CVE5- 9F 
LM=19
384.00000 668.00000
603.00000 678.00000
743.00000 677.00000
1071.00000 636.00000
1162.00000 571.00000
1177.00000 547.00000
999.00000 459.00000
925.00000 493.00000
797.00000 414.00000
845.00000 344.00000
704.00000 563.00000
686.00000 591.00000
502.00000 608.00000
484.00000 575.00000
489.00000 547.00000
473.00000 547.00000
456.00000 513.00000
410.00000 613.00000
411.00000 671.00000
IMAGE=CVEField10F.jpg
ID=CVE4-10F 
LM=19
364.00000 642.00000
573.00000 659.00000
722.00000 663.00000
1038.00000 618.00000
1124.00000 550.00000
1136.00000 531.00000
961.00000 450.00000
887.00000 486.00000
761.00000 399.00000
800.00000 337.00000
678.00000 549.00000
659.00000 572.00000
481.00000 586.00000
459.00000 559.00000
461.00000 534.00000
442.00000 532.00000
427.00000 498.00000
389.00000 590.00000
388.00000 645.00000
IMAGE=CVEField11F.jpg
ID=CVE4-11F 
LM=19
391.00000 683.00000
596.00000 696.00000
731.00000 696.00000
1051.00000 647.00000
1135.00000 580.00000
1147.00000 560.00000
982.00000 473.00000
917.00000 506.00000
778.00000 419.00000
815.00000 359.00000
689.00000 577.00000
668.00000 603.00000
503.00000 623.00000
483.00000 596.00000
486.00000 569.00000
468.00000 569.00000
446.00000 536.00000
416.00000 630.00000
416.00000 685.00000
IMAGE=CVEField12F.jpg
ID=CVE4-12F 
LM=19
333.00000 693.00000
577.00000 702.00000
749.00000 700.00000
1126.00000 674.00000
1232.00000 600.00000
1250.00000 573.00000
1052.00000 452.00000
960.00000 498.00000
808.00000 391.00000
856.00000 309.00000
729.00000 570.00000
705.00000 597.00000
479.00000 619.00000
452.00000 587.00000
459.00000 552.00000
441.00000 553.00000
412.00000 513.00000
365.00000 630.00000
363.00000 697.00000
IMAGE=CVEField13F.jpg
ID=CVE4-13F 
LM=19
383.00000 678.00000
595.00000 690.00000
736.00000 689.00000
1047.00000 645.00000
1135.00000 571.00000
1148.00000 551.00000
983.00000 459.00000
914.00000 493.00000
782.00000 415.00000
818.00000 347.00000
694.00000 569.00000
674.00000 599.00000
494.00000 620.00000
476.00000 590.00000
480.00000 561.00000
464.00000 564.00000
444.00000 528.00000
399.00000 625.00000
408.00000 680.00000
IMAGE=CVEField14F.jpg
ID=CVE4-14F 
LM=19
351.00000 675.00000
593.00000 686.00000
764.00000 685.00000
1128.00000 634.00000
1229.00000 559.00000
1247.00000 532.00000
1045.00000 433.00000
963.00000 472.00000
798.00000 365.00000
848.00000 288.00000
715.00000 550.00000
696.00000 580.00000
481.00000 605.00000
460.00000 572.00000
464.00000 539.00000
446.00000 543.00000
420.00000 502.00000
375.00000 614.00000
379.00000 679.00000
IMAGE=CVEField15M.jpg
ID=CVE4-15M 
LM=19
345.00000 691.00000
575.00000 702.00000
721.00000 698.00000
1047.00000 671.00000
1144.00000 615.00000
1165.00000 594.00000
976.00000 480.00000
904.00000 508.00000
736.00000 418.00000
775.00000 354.00000
678.00000 572.00000
655.00000 599.00000
471.00000 621.00000
450.00000 590.00000
455.00000 561.00000
437.00000 562.00000
414.00000 523.00000
370.00000 638.00000
375.00000 696.00000
IMAGE=CVEField16M.jpg
ID=CVE4-16M 
LM=19
364.00000 670.00000
586.00000 678.00000
730.00000 673.00000
1050.00000 639.00000
1150.00000 578.00000
1172.00000 552.00000
981.00000 446.00000
896.00000 487.00000
744.00000 407.00000
773.00000 341.00000
689.00000 556.00000
669.00000 585.00000
482.00000 610.00000
461.00000 577.00000
465.00000 549.00000
450.00000 552.00000
426.00000 513.00000
389.00000 618.00000
394.00000 672.00000
IMAGE=CVEField17M.jpg
ID=CVE4-17M 
LM=19
385.00000 677.00000
566.00000 681.00000
698.00000 683.00000
977.00000 636.00000
1049.00000 577.00000
1059.00000 561.00000
905.00000 485.00000
845.00000 520.00000
714.00000 454.00000
751.00000 397.00000
654.00000 586.00000
633.00000 607.00000
486.00000 629.00000
471.00000 602.00000
471.00000 579.00000
456.00000 582.00000
438.00000 549.00000
405.00000 634.00000
409.00000 680.00000
IMAGE=CVEField18M.jpg
ID=CVE4-18M 
LM=19
425.00000 670.00000
617.00000 675.00000
743.00000 670.00000
1027.00000 626.00000
1106.00000 566.00000
1122.00000 545.00000
954.00000 465.00000
889.00000 496.00000
751.00000 431.00000
784.00000 373.00000
696.00000 566.00000
680.00000 588.00000
531.00000 611.00000
507.00000 585.00000
510.00000 559.00000
494.00000 563.00000
476.00000 530.00000
447.00000 622.00000
448.00000 672.00000
IMAGE=CVEField19M.jpg
ID=CVE4-19M 
LM=19
344.00000 624.00000
559.00000 642.00000
702.00000 644.00000
1034.00000 602.00000
1115.00000 530.00000
1128.00000 511.00000
962.00000 440.00000
900.00000 465.00000
760.00000 377.00000
802.00000 312.00000
679.00000 529.00000
651.00000 556.00000
466.00000 567.00000
446.00000 534.00000
450.00000 507.00000
436.00000 507.00000
415.00000 474.00000
369.00000 569.00000
368.00000 626.00000
IMAGE=CVEField1F.jpg
ID=CVE4- 1F  
LM=19
434.00000 659.00000
639.00000 666.00000
767.00000 664.00000
1060.00000 616.00000
1138.00000 554.00000
1154.00000 533.00000
980.00000 461.00000
917.00000 497.00000
784.00000 429.00000
822.00000 370.00000
726.00000 562.00000
704.00000 586.00000
542.00000 604.00000
522.00000 576.00000
527.00000 552.00000
511.00000 554.00000
491.00000 519.00000
458.00000 612.00000
458.00000 662.00000
IMAGE=CVEField20M.jpg
ID=CVE4-20M 
LM=19
336.00000 685.00000
583.00000 702.00000
738.00000 699.00000
1103.00000 646.00000
1202.00000 567.00000
1219.00000 539.00000
1024.00000 444.00000
945.00000 486.00000
800.00000 383.00000
847.00000 317.00000
709.00000 561.00000
684.00000 592.00000
467.00000 618.00000
442.00000 587.00000
450.00000 552.00000
431.00000 556.00000
407.00000 513.00000
362.00000 626.00000
366.00000 688.00000
IMAGE=CVEField2F.jpg
ID=CVE4- 2F 
LM=19
327.00000 698.00000
573.00000 705.00000
737.00000 706.00000
1094.00000 652.00000
1195.00000 579.00000
1212.00000 554.00000
1015.00000 460.00000
938.00000 495.00000
781.00000 406.00000
823.00000 329.00000
667.00000 576.00000
646.00000 603.00000
450.00000 630.00000
431.00000 597.00000
435.00000 570.00000
417.00000 571.00000
396.00000 531.00000
353.00000 640.00000
359.00000 699.00000
IMAGE=CVEField3F.jpg
ID=CVE4- 3F 
LM=19
288.00000 672.00000
520.00000 683.00000
689.00000 685.00000
1060.00000 630.00000
1162.00000 554.00000
1178.00000 529.00000
972.00000 440.00000
895.00000 479.00000
731.00000 383.00000
777.00000 305.00000
664.00000 555.00000
646.00000 585.00000
416.00000 601.00000
398.00000 568.00000
404.00000 535.00000
385.00000 536.00000
364.00000 499.00000
298.00000 608.00000
313.00000 674.00000
IMAGE=CVEField4F.jpg
ID=CVE4- 4F 
LM=19
355.00000 667.00000
573.00000 679.00000
728.00000 681.00000
1078.00000 631.00000
1164.00000 556.00000
1178.00000 532.00000
1008.00000 459.00000
943.00000 498.00000
784.00000 408.00000
821.00000 331.00000
713.00000 564.00000
687.00000 592.00000
474.00000 605.00000
456.00000 574.00000
468.00000 554.00000
449.00000 556.00000
429.00000 514.00000
381.00000 609.00000
379.00000 669.00000
IMAGE=CVEField5F.jpg
ID=CVE4- 5F 
LM=19
325.00000 665.00000
570.00000 679.00000
730.00000 679.00000
1099.00000 645.00000
1205.00000 570.00000
1219.00000 545.00000
1021.00000 453.00000
944.00000 480.00000
793.00000 379.00000
848.00000 304.00000
700.00000 552.00000
676.00000 583.00000
461.00000 601.00000
437.00000 567.00000
446.00000 536.00000
426.00000 534.00000
406.00000 493.00000
352.00000 606.00000
351.00000 669.00000
IMAGE=CVEField6F.jpg
ID=CVE4- 6F 
LM=19
318.00000 648.00000
550.00000 664.00000
718.00000 666.00000
1081.00000 615.00000
1179.00000 536.00000
1189.00000 517.00000
996.00000 423.00000
917.00000 459.00000
772.00000 374.00000
820.00000 305.00000
667.00000 537.00000
643.00000 564.00000
445.00000 586.00000
424.00000 554.00000
430.00000 526.00000
414.00000 525.00000
394.00000 490.00000
349.00000 592.00000
349.00000 653.00000
IMAGE=CVEField7F.jpg
ID=CVE4- 7F 
LM=19
353.00000 688.00000
578.00000 696.00000
726.00000 692.00000
1068.00000 655.00000
1167.00000 587.00000
1180.00000 569.00000
999.00000 466.00000
926.00000 498.00000
766.00000 405.00000
802.00000 340.00000
710.00000 569.00000
689.00000 599.00000
476.00000 625.00000
457.00000 592.00000
461.00000 560.00000
443.00000 560.00000
418.00000 524.00000
379.00000 631.00000
385.00000 691.00000
IMAGE=CVEField8F.jpg
ID=CVE4- 8F 
LM=19
314.00000 681.00000
560.00000 699.00000
731.00000 698.00000
1110.00000 659.00000
1209.00000 579.00000
1223.00000 552.00000
1040.00000 463.00000
953.00000 503.00000
799.00000 383.00000
841.00000 310.00000
706.00000 566.00000
686.00000 600.00000
461.00000 613.00000
440.00000 573.00000
443.00000 541.00000
424.00000 541.00000
401.00000 503.00000
345.00000 617.00000
341.00000 683.00000
IMAGE=CVEField9F.jpg
ID=CVE4- 9F 
LM=19
340.00000 698.00000
564.00000 708.00000
730.00000 707.00000
1104.00000 657.00000
1204.00000 600.00000
1221.00000 580.00000
1023.00000 461.00000
948.00000 492.00000
774.00000 403.00000
817.00000 332.00000
683.00000 575.00000
666.00000 602.00000
459.00000 631.00000
435.00000 597.00000
437.00000 567.00000
420.00000 568.00000
396.00000 532.00000
363.00000 640.00000
366.00000 698.00000
IMAGE=CVGLab10F.jpg
ID=CVG3-10F 
LM=19
334.00000 681.00000
553.00000 689.00000
711.00000 687.00000
1058.00000 641.00000
1148.00000 585.00000
1167.00000 564.00000
980.00000 458.00000
896.00000 493.00000
726.00000 407.00000
764.00000 342.00000
662.00000 563.00000
638.00000 592.00000
456.00000 613.00000
435.00000 580.00000
436.00000 549.00000
418.00000 550.00000
394.00000 512.00000
357.00000 625.00000
359.00000 683.00000
IMAGE=CVGLab10M.jpg
ID=CVG3-10M  
LM=19
345.00000 694.00000
579.00000 704.00000
739.00000 702.00000
1111.00000 646.00000
1208.00000 583.00000
1229.00000 564.00000
1027.00000 443.00000
954.00000 474.00000
772.00000 383.00000
815.00000 310.00000
701.00000 562.00000
685.00000 596.00000
469.00000 628.00000
450.00000 591.00000
451.00000 560.00000
433.00000 558.00000
402.00000 522.00000
376.00000 634.00000
376.00000 696.00000
IMAGE=CVGLab11F.jpg
ID=CVG3-11F 
LM=19
345.00000 675.00000
571.00000 682.00000
742.00000 680.00000
1062.00000 633.00000
1157.00000 576.00000
1177.00000 556.00000
983.00000 445.00000
909.00000 479.00000
728.00000 398.00000
767.00000 330.00000
682.00000 555.00000
657.00000 584.00000
465.00000 612.00000
441.00000 575.00000
441.00000 544.00000
426.00000 545.00000
397.00000 509.00000
369.00000 620.00000
372.00000 677.00000
IMAGE=CVGLab11M.jpg
ID=CVG3-11M
LM=19
322.00000 679.00000
548.00000 689.00000
715.00000 685.00000
1091.00000 635.00000
1191.00000 573.00000
1210.00000 552.00000
1017.00000 433.00000
941.00000 466.00000
769.00000 370.00000
810.00000 300.00000
673.00000 550.00000
652.00000 581.00000
450.00000 613.00000
424.00000 575.00000
426.00000 543.00000
408.00000 545.00000
381.00000 506.00000
346.00000 623.00000
350.00000 681.00000
IMAGE=CVGLab12F.jpg
ID=CVG3-12F 
LM=19
359.00000 674.00000
574.00000 685.00000
723.00000 686.00000
1041.00000 644.00000
1139.00000 590.00000
1161.00000 566.00000
965.00000 459.00000
898.00000 493.00000
738.00000 413.00000
771.00000 352.00000
691.00000 564.00000
674.00000 595.00000
474.00000 617.00000
458.00000 584.00000
460.00000 553.00000
442.00000 553.00000
416.00000 516.00000
384.00000 625.00000
387.00000 677.00000
IMAGE=CVGLab12M.jpg
ID=CVG3-12M 
LM=19
356.00000 708.00000
585.00000 726.00000
739.00000 724.00000
1105.00000 675.00000
1200.00000 609.00000
1217.00000 588.00000
1024.00000 469.00000
948.00000 505.00000
770.00000 418.00000
815.00000 344.00000
696.00000 585.00000
679.00000 619.00000
474.00000 646.00000
455.00000 611.00000
454.00000 577.00000
437.00000 582.00000
413.00000 543.00000
382.00000 651.00000
386.00000 712.00000
IMAGE=CVGLab13F.jpg
ID=CVG3-13F 
LM=19
370.00000 677.00000
597.00000 687.00000
757.00000 685.00000
1113.00000 640.00000
1207.00000 585.00000
1229.00000 561.00000
1035.00000 446.00000
955.00000 480.00000
774.00000 400.00000
815.00000 332.00000
721.00000 552.00000
697.00000 590.00000
498.00000 612.00000
475.00000 578.00000
473.00000 547.00000
456.00000 547.00000
429.00000 506.00000
397.00000 622.00000
399.00000 681.00000
IMAGE=CVGLab13M.jpg
ID=CVG3-13M 
LM=19
319.00000 698.00000
557.00000 709.00000
737.00000 709.00000
1113.00000 655.00000
1224.00000 582.00000
1245.00000 556.00000
1031.00000 439.00000
952.00000 480.00000
769.00000 390.00000
814.00000 312.00000
689.00000 572.00000
670.00000 603.00000
449.00000 633.00000
424.00000 597.00000
429.00000 567.00000
409.00000 564.00000
386.00000 528.00000
344.00000 640.00000
349.00000 700.00000
IMAGE=CVGLab14F.jpg
ID=CVG3-14F 
LM=19
380.00000 643.00000
590.00000 647.00000
738.00000 643.00000
1060.00000 601.00000
1151.00000 545.00000
1171.00000 521.00000
975.00000 416.00000
903.00000 449.00000
745.00000 375.00000
779.00000 307.00000
707.00000 522.00000
686.00000 554.00000
493.00000 581.00000
476.00000 548.00000
472.00000 518.00000
457.00000 523.00000
435.00000 484.00000
404.00000 591.00000
408.00000 644.00000
IMAGE=CVGLab14M.jpg
ID=CVG3-14M  
LM=19
358.00000 684.00000
583.00000 697.00000
740.00000 694.00000
1087.00000 643.00000
1184.00000 577.00000
1202.00000 557.00000
1004.00000 442.00000
934.00000 474.00000
777.00000 386.00000
820.00000 314.00000
706.00000 558.00000
683.00000 590.00000
484.00000 622.00000
460.00000 588.00000
462.00000 557.00000
445.00000 557.00000
419.00000 519.00000
383.00000 628.00000
386.00000 686.00000
IMAGE=CVGLab15F.jpg
ID=CVG3-15F 
LM=19
364.00000 701.00000
582.00000 711.00000
732.00000 711.00000
1066.00000 657.00000
1148.00000 598.00000
1166.00000 581.00000
977.00000 476.00000
900.00000 511.00000
729.00000 439.00000
769.00000 371.00000
682.00000 587.00000
665.00000 614.00000
478.00000 641.00000
461.00000 608.00000
458.00000 578.00000
443.00000 580.00000
422.00000 542.00000
390.00000 649.00000
390.00000 704.00000
IMAGE=CVGLab15M.jpg
ID=CVG3-15M 
LM=19
339.00000 692.00000
573.00000 708.00000
742.00000 709.00000
1114.00000 655.00000
1208.00000 594.00000
1224.00000 575.00000
1043.00000 452.00000
966.00000 481.00000
790.00000 388.00000
833.00000 317.00000
689.00000 567.00000
669.00000 597.00000
464.00000 628.00000
442.00000 590.00000
444.00000 556.00000
424.00000 561.00000
397.00000 521.00000
392.00000 632.00000
368.00000 693.00000
IMAGE=CVGLab16F.jpg
ID=CVG3-16F 
LM=19
383.00000 701.00000
592.00000 709.00000
739.00000 708.00000
1059.00000 659.00000
1145.00000 605.00000
1164.00000 582.00000
977.00000 477.00000
908.00000 514.00000
749.00000 439.00000
779.00000 376.00000
700.00000 588.00000
680.00000 615.00000
499.00000 644.00000
475.00000 609.00000
476.00000 578.00000
459.00000 580.00000
433.00000 544.00000
406.00000 651.00000
411.00000 702.00000
IMAGE=CVGLab16M.jpg
ID=CVG3-16M 
LM=19
356.00000 690.00000
574.00000 701.00000
723.00000 699.00000
1083.00000 655.00000
1180.00000 598.00000
1198.00000 578.00000
1021.00000 463.00000
943.00000 495.00000
776.00000 404.00000
820.00000 339.00000
691.00000 567.00000
674.00000 601.00000
480.00000 625.00000
455.00000 593.00000
457.00000 563.00000
437.00000 566.00000
417.00000 529.00000
385.00000 630.00000
384.00000 692.00000
IMAGE=CVGLab17F.jpg
ID=CVG3-17F 
LM=19
353.00000 682.00000
564.00000 690.00000
714.00000 690.00000
1054.00000 644.00000
1140.00000 588.00000
1157.00000 569.00000
960.00000 461.00000
889.00000 493.00000
716.00000 419.00000
756.00000 353.00000
666.00000 568.00000
649.00000 596.00000
465.00000 618.00000
445.00000 588.00000
443.00000 558.00000
426.00000 564.00000
404.00000 528.00000
376.00000 629.00000
381.00000 684.00000
IMAGE=CVGLab17M.jpg
ID=CVG3-17M 
LM=19
316.00000 717.00000
537.00000 726.00000
696.00000 725.00000
1074.00000 673.00000
1175.00000 608.00000
1193.00000 590.00000
990.00000 474.00000
921.00000 502.00000
746.00000 416.00000
785.00000 347.00000
660.00000 589.00000
639.00000 620.00000
439.00000 652.00000
417.00000 613.00000
418.00000 579.00000
401.00000 584.00000
372.00000 546.00000
338.00000 658.00000
347.00000 720.00000
IMAGE=CVGLab18F.jpg
ID=CVG3-18F 
LM=19
371.00000 674.00000
588.00000 682.00000
745.00000 679.00000
1075.00000 630.00000
1159.00000 575.00000
1177.00000 556.00000
991.00000 446.00000
920.00000 482.00000
753.00000 401.00000
792.00000 336.00000
689.00000 555.00000
667.00000 585.00000
489.00000 614.00000
466.00000 581.00000
467.00000 549.00000
450.00000 551.00000
422.00000 515.00000
394.00000 625.00000
397.00000 678.00000
IMAGE=CVGLab18M.jpg
ID=CVG3-18M 
LM=19
327.00000 691.00000
555.00000 707.00000
716.00000 705.00000
1086.00000 655.00000
1176.00000 595.00000
1197.00000 573.00000
1014.00000 450.00000
941.00000 478.00000
754.00000 391.00000
797.00000 321.00000
669.00000 566.00000
651.00000 601.00000
450.00000 626.00000
427.00000 594.00000
425.00000 561.00000
410.00000 564.00000
381.00000 528.00000
356.00000 636.00000
353.00000 694.00000
IMAGE=CVGLab19F.jpg
ID=CVG3-19F 
LM=19
372.00000 653.00000
578.00000 657.00000
720.00000 658.00000
1047.00000 613.00000
1131.00000 558.00000
1148.00000 539.00000
962.00000 432.00000
892.00000 464.00000
725.00000 392.00000
761.00000 327.00000
680.00000 539.00000
663.00000 565.00000
485.00000 593.00000
460.00000 560.00000
461.00000 530.00000
442.00000 531.00000
418.00000 496.00000
396.00000 599.00000
396.00000 653.00000
IMAGE=CVGLab19M.jpg
ID=CVG3-19M 
LM=19
380.00000 660.00000
589.00000 672.00000
721.00000 665.00000
1060.00000 623.00000
1158.00000 565.00000
1176.00000 547.00000
990.00000 429.00000
920.00000 457.00000
778.00000 377.00000
818.00000 310.00000
690.00000 538.00000
678.00000 567.00000
493.00000 600.00000
475.00000 563.00000
474.00000 533.00000
457.00000 536.00000
429.00000 499.00000
403.00000 608.00000
406.00000 663.00000
IMAGE=CVGLab1F.jpg
ID=CVG3- 1F 
LM=19
400.00000 650.00000
606.00000 655.00000
734.00000 649.00000
1051.00000 592.00000
1136.00000 534.00000
1152.00000 514.00000
971.00000 414.00000
895.00000 448.00000
737.00000 395.00000
779.00000 318.00000
691.00000 531.00000
677.00000 560.00000
510.00000 588.00000
488.00000 557.00000
490.00000 527.00000
471.00000 527.00000
449.00000 495.00000
421.00000 600.00000
431.00000 652.00000
IMAGE=CVGLab1M.jpg
ID=CVG3- 1M 
LM=19
336.00000 671.00000
569.00000 684.00000
728.00000 685.00000
1084.00000 634.00000
1177.00000 572.00000
1195.00000 549.00000
998.00000 435.00000
927.00000 472.00000
762.00000 390.00000
811.00000 310.00000
687.00000 555.00000
667.00000 584.00000
466.00000 610.00000
441.00000 576.00000
442.00000 544.00000
423.00000 545.00000
395.00000 507.00000
360.00000 615.00000
364.00000 674.00000
IMAGE=CVGLab20F.jpg
ID=CVG3-20F 
LM=19
383.00000 667.00000
600.00000 678.00000
753.00000 680.00000
1087.00000 637.00000
1177.00000 581.00000
1193.00000 558.00000
1000.00000 453.00000
923.00000 485.00000
755.00000 410.00000
797.00000 341.00000
700.00000 558.00000
681.00000 584.00000
498.00000 608.00000
475.00000 572.00000
475.00000 542.00000
458.00000 545.00000
437.00000 508.00000
406.00000 613.00000
413.00000 670.00000
IMAGE=CVGLab20M.jpg
ID=CVG3-20M 
LM=19
346.00000 681.00000
566.00000 698.00000
725.00000 700.00000
1084.00000 651.00000
1180.00000 584.00000
1198.00000 568.00000
1013.00000 453.00000
937.00000 487.00000
762.00000 394.00000
801.00000 324.00000
689.00000 561.00000
674.00000 595.00000
463.00000 620.00000
446.00000 584.00000
449.00000 552.00000
428.00000 554.00000
403.00000 518.00000
370.00000 628.00000
374.00000 685.00000
IMAGE=CVGLab21F.jpg
ID=CVG3-21F 
LM=19
420.00000 694.00000
614.00000 696.00000
735.00000 690.00000
1027.00000 649.00000
1113.00000 595.00000
1130.00000 578.00000
959.00000 480.00000
891.00000 505.00000
748.00000 438.00000
782.00000 379.00000
691.00000 577.00000
681.00000 605.00000
519.00000 634.00000
502.00000 603.00000
500.00000 574.00000
484.00000 577.00000
460.00000 544.00000
437.00000 644.00000
444.00000 696.00000
IMAGE=CVGLab21M.jpg
ID=CVG3-21M  
LM=19
317.00000 681.00000
541.00000 692.00000
701.00000 694.00000
1068.00000 652.00000
1165.00000 590.00000
1181.00000 570.00000
984.00000 458.00000
914.00000 487.00000
745.00000 398.00000
790.00000 325.00000
660.00000 567.00000
641.00000 595.00000
437.00000 619.00000
418.00000 583.00000
419.00000 552.00000
402.00000 553.00000
379.00000 515.00000
341.00000 625.00000
343.00000 683.00000
IMAGE=CVGLab22F.jpg
ID=CVG3-22F 
LM=19
371.00000 672.00000
578.00000 680.00000
709.00000 680.00000
1043.00000 640.00000
1134.00000 591.00000
1151.00000 573.00000
960.00000 456.00000
882.00000 486.00000
729.00000 410.00000
765.00000 349.00000
662.00000 558.00000
647.00000 585.00000
482.00000 609.00000
459.00000 576.00000
461.00000 546.00000
445.00000 550.00000
418.00000 515.00000
393.00000 620.00000
396.00000 675.00000
IMAGE=CVGLab22M.jpg
ID=CVG3-22M 
LM=19
347.00000 686.00000
578.00000 697.00000
737.00000 692.00000
1102.00000 641.00000
1203.00000 577.00000
1221.00000 559.00000
1025.00000 434.00000
945.00000 470.00000
775.00000 380.00000
818.00000 309.00000
699.00000 555.00000
681.00000 589.00000
468.00000 619.00000
444.00000 584.00000
444.00000 552.00000
427.00000 552.00000
401.00000 516.00000
374.00000 624.00000
374.00000 688.00000
IMAGE=CVGLab23F.jpg
ID=CVG3-23F 
LM=19
430.00000 667.00000
634.00000 683.00000
753.00000 684.00000
1043.00000 656.00000
1140.00000 608.00000
1159.00000 590.00000
1005.00000 481.00000
918.00000 510.00000
778.00000 435.00000
812.00000 376.00000
710.00000 571.00000
699.00000 599.00000
536.00000 616.00000
521.00000 585.00000
521.00000 554.00000
504.00000 557.00000
481.00000 522.00000
457.00000 619.00000
456.00000 670.00000
IMAGE=CVGLab23M.jpg
ID=CVG3-23M 
LM=19
355.00000 676.00000
575.00000 690.00000
740.00000 689.00000
1092.00000 637.00000
1182.00000 575.00000
1201.00000 555.00000
1014.00000 437.00000
934.00000 473.00000
767.00000 382.00000
809.00000 309.00000
687.00000 554.00000
666.00000 584.00000
471.00000 612.00000
453.00000 576.00000
453.00000 546.00000
436.00000 548.00000
413.00000 510.00000
378.00000 622.00000
385.00000 679.00000
IMAGE=CVGLab24F.jpg
ID=CVG3-24F 
LM=19
383.00000 696.00000
589.00000 706.00000
727.00000 706.00000
1058.00000 667.00000
1153.00000 619.00000
1172.00000 601.00000
988.00000 484.00000
918.00000 508.00000
756.00000 436.00000
792.00000 376.00000
693.00000 588.00000
674.00000 618.00000
501.00000 639.00000
480.00000 605.00000
478.00000 574.00000
461.00000 576.00000
437.00000 539.00000
408.00000 646.00000
411.00000 699.00000
IMAGE=CVGLab24M.jpg
ID=CVG3-24M 
LM=19
344.00000 647.00000
558.00000 658.00000
705.00000 658.00000
1045.00000 616.00000
1135.00000 559.00000
1151.00000 543.00000
975.00000 431.00000
909.00000 461.00000
754.00000 377.00000
793.00000 314.00000
670.00000 535.00000
652.00000 564.00000
462.00000 588.00000
438.00000 555.00000
444.00000 523.00000
425.00000 528.00000
402.00000 493.00000
366.00000 595.00000
372.00000 649.00000
IMAGE=CVGLab25F.jpg
ID=CVG3-25F 
LM=19
427.00000 695.00000
620.00000 702.00000
743.00000 700.00000
1040.00000 680.00000
1131.00000 638.00000
1151.00000 621.00000
982.00000 503.00000
921.00000 526.00000
763.00000 454.00000
799.00000 393.00000
707.00000 588.00000
689.00000 615.00000
532.00000 638.00000
511.00000 607.00000
512.00000 579.00000
496.00000 582.00000
473.00000 549.00000
465.00000 642.00000
454.00000 698.00000
IMAGE=CVGLab25M.jpg
ID=CVG3-25M 
LM=19
333.00000 694.00000
570.00000 706.00000
747.00000 702.00000
1122.00000 636.00000
1216.00000 569.00000
1234.00000 548.00000
1036.00000 426.00000
954.00000 469.00000
777.00000 376.00000
816.00000 304.00000
698.00000 558.00000
678.00000 592.00000
459.00000 628.00000
439.00000 589.00000
439.00000 554.00000
421.00000 557.00000
392.00000 517.00000
360.00000 635.00000
367.00000 698.00000
IMAGE=CVGLab26F.jpg
ID=CVG3-26F 
LM=19
388.00000 683.00000
610.00000 694.00000
760.00000 693.00000
1085.00000 658.00000
1180.00000 602.00000
1202.00000 578.00000
1008.00000 473.00000
948.00000 504.00000
776.00000 423.00000
816.00000 359.00000
725.00000 575.00000
705.00000 601.00000
507.00000 624.00000
486.00000 590.00000
485.00000 560.00000
468.00000 562.00000
447.00000 524.00000
411.00000 632.00000
414.00000 686.00000
IMAGE=CVGLab26M.jpg
ID=CVG3-26M 
LM=19
374.00000 709.00000
589.00000 726.00000
727.00000 721.00000
1067.00000 675.00000
1167.00000 614.00000
1184.00000 598.00000
1009.00000 483.00000
919.00000 518.00000
779.00000 436.00000
817.00000 369.00000
688.00000 593.00000
673.00000 620.00000
486.00000 649.00000
470.00000 611.00000
469.00000 583.00000
453.00000 585.00000
432.00000 548.00000
399.00000 655.00000
402.00000 711.00000
IMAGE=CVGLab27F.jpg
ID=CVG3-27F 
LM=19
383.00000 668.00000
584.00000 676.00000
718.00000 672.00000
1044.00000 623.00000
1135.00000 568.00000
1154.00000 551.00000
973.00000 446.00000
897.00000 477.00000
733.00000 413.00000
763.00000 352.00000
681.00000 554.00000
665.00000 583.00000
494.00000 608.00000
471.00000 577.00000
473.00000 547.00000
457.00000 550.00000
433.00000 514.00000
408.00000 614.00000
409.00000 671.00000
IMAGE=CVGLab27M.jpg
ID=CVG3-27M 
LM=19
338.00000 696.00000
569.00000 718.00000
706.00000 715.00000
1066.00000 683.00000
1175.00000 630.00000
1194.00000 613.00000
1017.00000 481.00000
933.00000 507.00000
777.00000 417.00000
814.00000 353.00000
676.00000 579.00000
661.00000 613.00000
461.00000 634.00000
447.00000 597.00000
446.00000 566.00000
429.00000 570.00000
404.00000 532.00000
368.00000 639.00000
365.00000 698.00000
IMAGE=CVGLab28F.jpg
ID=CVG3-28F 
LM=19
381.00000 689.00000
598.00000 702.00000
746.00000 702.00000
1089.00000 664.00000
1179.00000 607.00000
1197.00000 587.00000
1008.00000 478.00000
939.00000 506.00000
762.00000 431.00000
803.00000 361.00000
703.00000 580.00000
685.00000 607.00000
498.00000 629.00000
476.00000 595.00000
476.00000 564.00000
461.00000 567.00000
435.00000 530.00000
409.00000 637.00000
410.00000 694.00000
IMAGE=CVGLab28M.jpg
ID=CVG3-28M 
LM=19
336.00000 645.00000
548.00000 660.00000
686.00000 659.00000
1050.00000 612.00000
1151.00000 550.00000
1162.00000 538.00000
972.00000 414.00000
899.00000 443.00000
746.00000 361.00000
787.00000 292.00000
651.00000 527.00000
638.00000 558.00000
452.00000 584.00000
433.00000 549.00000
435.00000 515.00000
416.00000 516.00000
393.00000 478.00000
361.00000 589.00000
362.00000 647.00000
IMAGE=CVGLab29F.jpg
ID=CVG3-29F 
LM=19
366.00000 691.00000
582.00000 706.00000
719.00000 706.00000
1062.00000 659.00000
1153.00000 603.00000
1172.00000 583.00000
984.00000 465.00000
907.00000 498.00000
749.00000 413.00000
782.00000 355.00000
670.00000 573.00000
654.00000 603.00000
483.00000 628.00000
464.00000 590.00000
465.00000 559.00000
446.00000 558.00000
417.00000 520.00000
390.00000 630.00000
395.00000 695.00000
IMAGE=CVGLab29M.jpg
ID=CVG3-29M 
LM=19
354.00000 683.00000
580.00000 696.00000
721.00000 696.00000
1081.00000 638.00000
1172.00000 578.00000
1185.00000 566.00000
999.00000 438.00000
935.00000 463.00000
767.00000 385.00000
805.00000 317.00000
673.00000 560.00000
659.00000 590.00000
476.00000 622.00000
453.00000 585.00000
453.00000 554.00000
437.00000 556.00000
409.00000 520.00000
379.00000 628.00000
381.00000 685.00000
IMAGE=CVGLab2F.jpg
ID=CVG3- 2F 
LM=19
420.00000 663.00000
621.00000 667.00000
743.00000 663.00000
1066.00000 614.00000
1152.00000 555.00000
1168.00000 537.00000
985.00000 439.00000
912.00000 473.00000
758.00000 408.00000
788.00000 349.00000
703.00000 547.00000
690.00000 575.00000
533.00000 599.00000
509.00000 569.00000
509.00000 540.00000
491.00000 542.00000
465.00000 508.00000
445.00000 608.00000
447.00000 664.00000
IMAGE=CVGLab2M.jpg
ID=CVG3- 2M 
LM=19
366.00000 676.00000
576.00000 690.00000
702.00000 693.00000
1047.00000 647.00000
1144.00000 592.00000
1157.00000 579.00000
985.00000 470.00000
913.00000 500.00000
769.00000 423.00000
807.00000 358.00000
687.00000 570.00000
674.00000 596.00000
483.00000 619.00000
464.00000 587.00000
468.00000 559.00000
451.00000 560.00000
428.00000 525.00000
390.00000 627.00000
393.00000 678.00000
IMAGE=CVGLab30F.jpg
ID=CVG3-30F 
LM=19
386.00000 696.00000
592.00000 705.00000
734.00000 705.00000
1066.00000 664.00000
1157.00000 611.00000
1172.00000 591.00000
991.00000 480.00000
915.00000 514.00000
758.00000 433.00000
793.00000 372.00000
679.00000 585.00000
662.00000 611.00000
498.00000 636.00000
480.00000 600.00000
479.00000 568.00000
462.00000 569.00000
436.00000 531.00000
408.00000 642.00000
414.00000 699.00000
IMAGE=CVGLab30M.jpg
ID=CVG3-30M 
LM=19
370.00000 656.00000
584.00000 669.00000
725.00000 668.00000
1086.00000 623.00000
1183.00000 563.00000
1198.00000 548.00000
1016.00000 426.00000
937.00000 454.00000
781.00000 371.00000
826.00000 303.00000
682.00000 537.00000
670.00000 565.00000
485.00000 593.00000
466.00000 559.00000
469.00000 527.00000
449.00000 527.00000
427.00000 488.00000
394.00000 597.00000
397.00000 659.00000
IMAGE=CVGLab31F.jpg
ID=CVG3-31F 
LM=19
392.00000 681.00000
596.00000 690.00000
735.00000 687.00000
1042.00000 648.00000
1139.00000 590.00000
1158.00000 569.00000
971.00000 462.00000
896.00000 493.00000
746.00000 421.00000
780.00000 359.00000
688.00000 564.00000
673.00000 593.00000
498.00000 620.00000
482.00000 586.00000
480.00000 557.00000
465.00000 559.00000
442.00000 524.00000
414.00000 628.00000
419.00000 683.00000
IMAGE=CVGLab31M.jpg
ID=CVG3-31M 
LM=19
322.00000 683.00000
560.00000 698.00000
724.00000 698.00000
1085.00000 648.00000
1181.00000 584.00000
1199.00000 562.00000
1008.00000 450.00000
935.00000 484.00000
758.00000 388.00000
805.00000 314.00000
689.00000 556.00000
672.00000 592.00000
457.00000 619.00000
432.00000 585.00000
432.00000 551.00000
415.00000 550.00000
387.00000 512.00000
349.00000 627.00000
355.00000 685.00000
IMAGE=CVGLab32F.jpg
ID=CVG3-32F 
LM=19
380.00000 683.00000
592.00000 691.00000
728.00000 690.00000
1056.00000 648.00000
1153.00000 598.00000
1171.00000 577.00000
987.00000 466.00000
905.00000 496.00000
748.00000 419.00000
784.00000 357.00000
679.00000 568.00000
667.00000 596.00000
497.00000 621.00000
476.00000 586.00000
476.00000 554.00000
454.00000 555.00000
432.00000 522.00000
403.00000 631.00000
409.00000 686.00000
IMAGE=CVGLab32M.jpg
ID=CVG3-32M 
LM=19
356.00000 656.00000
574.00000 676.00000
703.00000 674.00000
1069.00000 640.00000
1172.00000 581.00000
1185.00000 570.00000
1006.00000 443.00000
933.00000 462.00000
772.00000 380.00000
815.00000 312.00000
686.00000 540.00000
675.00000 573.00000
480.00000 597.00000
457.00000 561.00000
456.00000 528.00000
438.00000 530.00000
415.00000 492.00000
383.00000 597.00000
384.00000 660.00000
IMAGE=CVGLab33F.jpg
ID=CVG3-33F 
LM=19
403.00000 680.00000
612.00000 686.00000
746.00000 684.00000
1076.00000 647.00000
1172.00000 589.00000
1189.00000 568.00000
1006.00000 460.00000
923.00000 491.00000
773.00000 416.00000
806.00000 353.00000
708.00000 563.00000
692.00000 595.00000
522.00000 619.00000
497.00000 585.00000
494.00000 553.00000
477.00000 555.00000
450.00000 519.00000
426.00000 630.00000
430.00000 682.00000
IMAGE=CVGLab33M.jpg
ID=CVG3-33M 
LM=19
337.00000 692.00000
575.00000 707.00000
744.00000 710.00000
1123.00000 666.00000
1223.00000 598.00000
1242.00000 579.00000
1039.00000 458.00000
964.00000 492.00000
794.00000 395.00000
848.00000 320.00000
704.00000 569.00000
681.00000 600.00000
463.00000 626.00000
444.00000 591.00000
446.00000 556.00000
426.00000 556.00000
406.00000 519.00000
364.00000 631.00000
368.00000 694.00000
IMAGE=CVGLab34F.jpg
ID=CVG3-34F 
LM=19
360.00000 701.00000
581.00000 710.00000
713.00000 707.00000
1062.00000 677.00000
1170.00000 620.00000
1189.00000 603.00000
992.00000 472.00000
909.00000 504.00000
734.00000 422.00000
765.00000 353.00000
683.00000 578.00000
670.00000 609.00000
486.00000 636.00000
460.00000 598.00000
457.00000 567.00000
440.00000 571.00000
416.00000 532.00000
387.00000 643.00000
392.00000 703.00000
IMAGE=CVGLab34M.jpg
ID=CVG3-34M 
LM=19
353.00000 700.00000
563.00000 712.00000
700.00000 713.00000
1050.00000 670.00000
1157.00000 605.00000
1173.00000 591.00000
988.00000 472.00000
924.00000 499.00000
758.00000 417.00000
795.00000 347.00000
672.00000 580.00000
659.00000 612.00000
472.00000 638.00000
452.00000 601.00000
453.00000 572.00000
435.00000 574.00000
410.00000 539.00000
377.00000 644.00000
381.00000 702.00000
IMAGE=CVGLab35F.jpg
ID=CVG3-35F 
LM=19
384.00000 670.00000
599.00000 678.00000
743.00000 674.00000
1087.00000 633.00000
1185.00000 578.00000
1203.00000 563.00000
1008.00000 437.00000
926.00000 469.00000
765.00000 390.00000
797.00000 326.00000
698.00000 545.00000
684.00000 577.00000
506.00000 607.00000
483.00000 569.00000
482.00000 537.00000
464.00000 539.00000
438.00000 502.00000
404.00000 615.00000
418.00000 671.00000
IMAGE=CVGLab35M.jpg
ID=CVG3-35M 
LM=19
343.00000 692.00000
565.00000 711.00000
711.00000 711.00000
1080.00000 653.00000
1182.00000 583.00000
1199.00000 563.00000
1001.00000 446.00000
935.00000 473.00000
763.00000 400.00000
805.00000 326.00000
672.00000 567.00000
657.00000 600.00000
466.00000 631.00000
444.00000 590.00000
442.00000 560.00000
428.00000 562.00000
400.00000 526.00000
366.00000 636.00000
372.00000 695.00000
IMAGE=CVGLab36F.jpg
ID=CVG3-36F 
LM=19
382.00000 695.00000
592.00000 703.00000
728.00000 703.00000
1055.00000 665.00000
1156.00000 609.00000
1177.00000 591.00000
1000.00000 468.00000
907.00000 505.00000
760.00000 430.00000
792.00000 365.00000
683.00000 577.00000
668.00000 607.00000
500.00000 634.00000
479.00000 597.00000
480.00000 568.00000
463.00000 568.00000
437.00000 531.00000
407.00000 642.00000
411.00000 698.00000
IMAGE=CVGLab36M.jpg
ID=CVG3-36M 
LM=19
348.00000 682.00000
568.00000 699.00000
715.00000 699.00000
1067.00000 660.00000
1177.00000 600.00000
1194.00000 583.00000
1013.00000 456.00000
926.00000 491.00000
784.00000 401.00000
823.00000 333.00000
681.00000 564.00000
666.00000 598.00000
470.00000 622.00000
453.00000 586.00000
456.00000 550.00000
438.00000 554.00000
412.00000 516.00000
375.00000 628.00000
377.00000 686.00000
IMAGE=CVGLab37F.jpg
ID=CVG3-37F 
LM=19
371.00000 671.00000
586.00000 689.00000
722.00000 682.00000
1060.00000 634.00000
1157.00000 577.00000
1177.00000 556.00000
981.00000 446.00000
906.00000 478.00000
748.00000 401.00000
781.00000 338.00000
683.00000 548.00000
668.00000 582.00000
485.00000 610.00000
466.00000 576.00000
466.00000 541.00000
447.00000 543.00000
424.00000 505.00000
395.00000 617.00000
400.00000 678.00000
IMAGE=CVGLab37M.jpg
ID=CVG3-37M 
LM=19
370.00000 726.00000
592.00000 747.00000
731.00000 749.00000
1106.00000 713.00000
1206.00000 654.00000
1222.00000 639.00000
1042.00000 506.00000
975.00000 525.00000
799.00000 442.00000
833.00000 377.00000
706.00000 612.00000
687.00000 642.00000
491.00000 666.00000
470.00000 628.00000
471.00000 596.00000
452.00000 600.00000
428.00000 560.00000
398.00000 667.00000
398.00000 730.00000
IMAGE=CVGLab38F.jpg
ID=CVG3-38F 
LM=19
360.00000 669.00000
574.00000 679.00000
715.00000 677.00000
1054.00000 638.00000
1156.00000 577.00000
1173.00000 558.00000
980.00000 444.00000
892.00000 477.00000
732.00000 396.00000
762.00000 335.00000
672.00000 554.00000
657.00000 584.00000
475.00000 608.00000
456.00000 572.00000
455.00000 540.00000
437.00000 539.00000
409.00000 504.00000
382.00000 616.00000
385.00000 672.00000
IMAGE=CVGLab38M.jpg
ID=CVG3-38M 
LM=19
314.00000 694.00000
549.00000 713.00000
700.00000 709.00000
1079.00000 670.00000
1193.00000 608.00000
1209.00000 589.00000
1012.00000 456.00000
932.00000 481.00000
762.00000 394.00000
795.00000 323.00000
665.00000 570.00000
651.00000 604.00000
447.00000 629.00000
422.00000 590.00000
423.00000 555.00000
406.00000 556.00000
381.00000 517.00000
341.00000 635.00000
349.00000 698.00000
IMAGE=CVGLab39F.jpg
ID=CVG3-39F 
LM=19
402.00000 629.00000
608.00000 633.00000
742.00000 629.00000
1048.00000 591.00000
1146.00000 534.00000
1164.00000 518.00000
986.00000 408.00000
907.00000 440.00000
763.00000 367.00000
790.00000 309.00000
709.00000 511.00000
698.00000 541.00000
519.00000 569.00000
497.00000 534.00000
496.00000 503.00000
478.00000 505.00000
450.00000 471.00000
427.00000 577.00000
432.00000 631.00000
IMAGE=CVGLab39M.jpg
ID=CVG3-39M 
LM=19
356.00000 681.00000
573.00000 696.00000
719.00000 693.00000
1076.00000 640.00000
1170.00000 578.00000
1187.00000 561.00000
1008.00000 446.00000
927.00000 474.00000
766.00000 396.00000
803.00000 323.00000
678.00000 553.00000
664.00000 586.00000
469.00000 616.00000
454.00000 580.00000
456.00000 549.00000
438.00000 552.00000
416.00000 513.00000
379.00000 625.00000
383.00000 683.00000
IMAGE=CVGLab3F.jpg
ID=CVG3- 3F 
LM=19
390.00000 694.00000
587.00000 702.00000
715.00000 699.00000
1012.00000 661.00000
1100.00000 613.00000
1115.00000 597.00000
947.00000 490.00000
878.00000 516.00000
731.00000 450.00000
771.00000 389.00000
676.00000 587.00000
659.00000 612.00000
498.00000 638.00000
480.00000 609.00000
479.00000 580.00000
462.00000 583.00000
437.00000 550.00000
412.00000 648.00000
417.00000 698.00000
IMAGE=CVGLab3M.jpg
ID=CVG3- 3M 
LM=19
340.00000 720.00000
564.00000 738.00000
709.00000 733.00000
1090.00000 700.00000
1206.00000 635.00000
1224.00000 616.00000
1025.00000 475.00000
942.00000 504.00000
764.00000 414.00000
799.00000 342.00000
681.00000 589.00000
669.00000 624.00000
464.00000 653.00000
438.00000 616.00000
435.00000 584.00000
420.00000 586.00000
390.00000 549.00000
363.00000 664.00000
369.00000 722.00000
IMAGE=CVGLab40F.jpg
ID=CVG3-40F 
LM=19
386.00000 689.00000
590.00000 700.00000
719.00000 700.00000
1041.00000 652.00000
1124.00000 584.00000
1142.00000 563.00000
971.00000 484.00000
896.00000 520.00000
749.00000 444.00000
785.00000 381.00000
674.00000 587.00000
661.00000 616.00000
498.00000 633.00000
477.00000 600.00000
481.00000 573.00000
463.00000 573.00000
440.00000 535.00000
414.00000 635.00000
411.00000 692.00000
IMAGE=CVGLab40M.jpg
ID=CVG3-40M 
LM=19
349.00000 661.00000
568.00000 681.00000
703.00000 682.00000
1063.00000 653.00000
1169.00000 595.00000
1180.00000 584.00000
1005.00000 452.00000
933.00000 476.00000
772.00000 388.00000
807.00000 326.00000
687.00000 547.00000
670.00000 580.00000
473.00000 603.00000
453.00000 567.00000
457.00000 534.00000
439.00000 534.00000
411.00000 500.00000
374.00000 606.00000
378.00000 666.00000
IMAGE=CVGLab41F.jpg
ID=CVG3-41F 
LM=19
369.00000 666.00000
570.00000 673.00000
704.00000 672.00000
1026.00000 640.00000
1122.00000 590.00000
1141.00000 573.00000
963.00000 454.00000
879.00000 483.00000
733.00000 409.00000
770.00000 345.00000
673.00000 545.00000
652.00000 582.00000
484.00000 606.00000
463.00000 570.00000
464.00000 541.00000
447.00000 542.00000
422.00000 505.00000
394.00000 611.00000
397.00000 667.00000
IMAGE=CVGLab41M.jpg
ID=CVG3-41M 
LM=19
370.00000 690.00000
596.00000 711.00000
746.00000 710.00000
1120.00000 653.00000
1222.00000 584.00000
1239.00000 566.00000
1038.00000 441.00000
976.00000 466.00000
804.00000 388.00000
838.00000 321.00000
708.00000 563.00000
693.00000 597.00000
492.00000 626.00000
472.00000 589.00000
475.00000 557.00000
454.00000 557.00000
424.00000 519.00000
396.00000 629.00000
400.00000 695.00000
IMAGE=CVGLab42F.jpg
ID=CVG3-42F 
LM=19
366.00000 683.00000
571.00000 694.00000
708.00000 692.00000
1029.00000 650.00000
1115.00000 600.00000
1131.00000 584.00000
963.00000 470.00000
871.00000 503.00000
715.00000 432.00000
747.00000 358.00000
661.00000 571.00000
642.00000 602.00000
478.00000 627.00000
456.00000 590.00000
456.00000 562.00000
441.00000 568.00000
416.00000 529.00000
387.00000 633.00000
391.00000 687.00000
IMAGE=CVGLab42M.jpg
ID=CVG3-42M 
LM=19
357.00000 701.00000
581.00000 718.00000
722.00000 716.00000
1069.00000 671.00000
1168.00000 616.00000
1185.00000 601.00000
1019.00000 471.00000
927.00000 504.00000
773.00000 420.00000
810.00000 355.00000
674.00000 584.00000
661.00000 614.00000
472.00000 641.00000
456.00000 605.00000
457.00000 575.00000
441.00000 577.00000
418.00000 544.00000
383.00000 647.00000
386.00000 706.00000
IMAGE=CVGLab43F.jpg
ID=CVG3-43F 
LM=19
391.00000 685.00000
601.00000 693.00000
734.00000 692.00000
1036.00000 649.00000
1124.00000 589.00000
1137.00000 576.00000
969.00000 475.00000
886.00000 506.00000
741.00000 436.00000
774.00000 375.00000
681.00000 575.00000
666.00000 603.00000
503.00000 628.00000
484.00000 597.00000
483.00000 565.00000
470.00000 567.00000
444.00000 536.00000
414.00000 636.00000
420.00000 689.00000
IMAGE=CVGLab43M.jpg
ID=CVG3-43M 
LM=19
385.00000 698.00000
605.00000 711.00000
743.00000 710.00000
1104.00000 662.00000
1203.00000 603.00000
1217.00000 588.00000
1036.00000 463.00000
960.00000 493.00000
803.00000 406.00000
837.00000 341.00000
709.00000 573.00000
698.00000 606.00000
502.00000 636.00000
486.00000 597.00000
487.00000 564.00000
465.00000 564.00000
437.00000 528.00000
413.00000 635.00000
411.00000 699.00000
IMAGE=CVGLab44F.jpg
ID=CVG3-44F 
LM=19
389.00000 668.00000
604.00000 680.00000
738.00000 678.00000
1050.00000 629.00000
1140.00000 573.00000
1154.00000 560.00000
982.00000 452.00000
903.00000 486.00000
746.00000 417.00000
780.00000 349.00000
692.00000 558.00000
673.00000 590.00000
506.00000 612.00000
485.00000 579.00000
486.00000 548.00000
470.00000 550.00000
442.00000 516.00000
414.00000 617.00000
416.00000 672.00000
IMAGE=CVGLab44M.jpg
ID=CVG3-44M 
LM=19
345.00000 663.00000
564.00000 674.00000
702.00000 672.00000
1072.00000 627.00000
1180.00000 556.00000
1193.00000 540.00000
1003.00000 424.00000
920.00000 455.00000
760.00000 373.00000
799.00000 300.00000
681.00000 536.00000
663.00000 571.00000
463.00000 596.00000
445.00000 562.00000
443.00000 528.00000
428.00000 532.00000
401.00000 495.00000
368.00000 606.00000
373.00000 666.00000
IMAGE=CVGLab45F.jpg
ID=CVG3-45F 
LM=19
405.00000 664.00000
607.00000 674.00000
743.00000 674.00000
1040.00000 635.00000
1131.00000 579.00000
1146.00000 562.00000
978.00000 450.00000
909.00000 474.00000
751.00000 407.00000
784.00000 346.00000
691.00000 553.00000
676.00000 581.00000
514.00000 604.00000
497.00000 573.00000
497.00000 542.00000
481.00000 541.00000
454.00000 511.00000
425.00000 612.00000
428.00000 666.00000
IMAGE=CVGLab45M.jpg
ID=CVG3-45M 
LM=19
368.00000 660.00000
587.00000 675.00000
727.00000 673.00000
1088.00000 632.00000
1188.00000 573.00000
1207.00000 557.00000
1017.00000 434.00000
941.00000 463.00000
776.00000 376.00000
812.00000 310.00000
697.00000 537.00000
683.00000 570.00000
486.00000 596.00000
468.00000 562.00000
466.00000 531.00000
450.00000 531.00000
424.00000 494.00000
392.00000 604.00000
395.00000 663.00000
IMAGE=CVGLab46F.jpg
ID=CVG3-46F 
LM=19
388.00000 675.00000
594.00000 685.00000
725.00000 684.00000
1030.00000 645.00000
1117.00000 587.00000
1131.00000 573.00000
966.00000 468.00000
889.00000 496.00000
742.00000 422.00000
776.00000 364.00000
687.00000 564.00000
673.00000 592.00000
499.00000 617.00000
479.00000 585.00000
479.00000 551.00000
465.00000 554.00000
439.00000 521.00000
411.00000 623.00000
414.00000 677.00000
IMAGE=CVGLab46M.jpg
ID=CVG3-46M 
LM=19
308.00000 685.00000
529.00000 699.00000
672.00000 695.00000
1047.00000 646.00000
1150.00000 577.00000
1165.00000 562.00000
967.00000 439.00000
887.00000 470.00000
727.00000 388.00000
760.00000 315.00000
644.00000 556.00000
629.00000 590.00000
432.00000 618.00000
413.00000 579.00000
413.00000 551.00000
394.00000 550.00000
370.00000 515.00000
333.00000 625.00000
338.00000 687.00000
IMAGE=CVGLab47F.jpg
ID=CVG3-47F
LM=19
409.00000 663.00000
601.00000 675.00000
723.00000 676.00000
1013.00000 648.00000
1104.00000 595.00000
1117.00000 581.00000
945.00000 476.00000
881.00000 498.00000
737.00000 432.00000
776.00000 372.00000
687.00000 562.00000
674.00000 590.00000
514.00000 611.00000
496.00000 581.00000
495.00000 554.00000
478.00000 555.00000
458.00000 522.00000
432.00000 616.00000
434.00000 667.00000
IMAGE=CVGLab47M.jpg
ID=CVG3-47M 
LM=19
371.00000 665.00000
601.00000 681.00000
746.00000 677.00000
1112.00000 627.00000
1215.00000 557.00000
1230.00000 540.00000
1036.00000 426.00000
954.00000 460.00000
803.00000 369.00000
843.00000 295.00000
700.00000 541.00000
684.00000 570.00000
495.00000 601.00000
475.00000 562.00000
477.00000 530.00000
458.00000 529.00000
430.00000 490.00000
392.00000 607.00000
396.00000 668.00000
IMAGE=CVGLab48F.jpg
ID=CVG3-48F 
LM=19
425.00000 673.00000
632.00000 683.00000
767.00000 681.00000
1078.00000 634.00000
1171.00000 570.00000
1185.00000 553.00000
1018.00000 446.00000
944.00000 482.00000
784.00000 405.00000
812.00000 346.00000
722.00000 559.00000
709.00000 588.00000
540.00000 616.00000
520.00000 580.00000
517.00000 549.00000
501.00000 551.00000
477.00000 515.00000
448.00000 621.00000
452.00000 675.00000
IMAGE=CVGLab48M.jpg
ID=CVG3-48M 
LM=19
378.00000 688.00000
594.00000 704.00000
728.00000 703.00000
1090.00000 664.00000
1196.00000 605.00000
1210.00000 591.00000
1039.00000 465.00000
959.00000 490.00000
792.00000 406.00000
827.00000 343.00000
701.00000 573.00000
682.00000 601.00000
499.00000 627.00000
478.00000 593.00000
481.00000 562.00000
461.00000 561.00000
438.00000 524.00000
406.00000 633.00000
407.00000 691.00000
IMAGE=CVGLab49F.jpg
ID=CVG3-49F 
LM=19
404.00000 622.00000
607.00000 636.00000
736.00000 636.00000
1036.00000 598.00000
1119.00000 548.00000
1133.00000 536.00000
971.00000 426.00000
894.00000 453.00000
753.00000 389.00000
790.00000 328.00000
691.00000 519.00000
676.00000 546.00000
514.00000 569.00000
499.00000 534.00000
498.00000 506.00000
483.00000 508.00000
460.00000 473.00000
427.00000 574.00000
429.00000 627.00000
IMAGE=CVGLab49M.jpg
ID=CVG3-49M 
LM=19
394.00000 670.00000
594.00000 684.00000
724.00000 680.00000
1066.00000 636.00000
1159.00000 576.00000
1172.00000 561.00000
1009.00000 446.00000
940.00000 470.00000
785.00000 397.00000
823.00000 332.00000
702.00000 553.00000
687.00000 583.00000
506.00000 611.00000
485.00000 577.00000
488.00000 546.00000
472.00000 549.00000
445.00000 514.00000
417.00000 618.00000
420.00000 673.00000
IMAGE=CVGLab4F.jpg
ID=CVG3- 4F 
LM=19
439.00000 679.00000
639.00000 689.00000
777.00000 686.00000
1083.00000 645.00000
1171.00000 592.00000
1184.00000 575.00000
1016.00000 468.00000
938.00000 498.00000
787.00000 430.00000
822.00000 366.00000
723.00000 568.00000
707.00000 595.00000
546.00000 620.00000
525.00000 588.00000
524.00000 557.00000
509.00000 560.00000
486.00000 527.00000
460.00000 631.00000
465.00000 682.00000
IMAGE=CVGLab4M.jpg
ID=CVG3- 4M 
LM=19
396.00000 678.00000
601.00000 701.00000
736.00000 701.00000
1086.00000 657.00000
1184.00000 598.00000
1195.00000 582.00000
1031.00000 462.00000
948.00000 491.00000
797.00000 414.00000
832.00000 351.00000
707.00000 572.00000
691.00000 603.00000
513.00000 624.00000
497.00000 588.00000
499.00000 559.00000
483.00000 557.00000
460.00000 523.00000
423.00000 626.00000
420.00000 683.00000
IMAGE=CVGLab50F.jpg
ID=CVG3-50F 
LM=19
369.00000 628.00000
561.00000 638.00000
680.00000 637.00000
995.00000 600.00000
1086.00000 545.00000
1099.00000 530.00000
932.00000 418.00000
855.00000 446.00000
705.00000 381.00000
741.00000 315.00000
651.00000 519.00000
641.00000 548.00000
478.00000 573.00000
462.00000 539.00000
459.00000 508.00000
443.00000 511.00000
416.00000 475.00000
394.00000 578.00000
395.00000 631.00000
IMAGE=CVGLab50M.jpg
ID=CVG3-50M 
LM=19
340.00000 639.00000
547.00000 656.00000
692.00000 657.00000
1037.00000 615.00000
1134.00000 555.00000
1148.00000 541.00000
971.00000 421.00000
888.00000 454.00000
746.00000 370.00000
786.00000 303.00000
654.00000 530.00000
639.00000 557.00000
453.00000 583.00000
437.00000 549.00000
438.00000 518.00000
422.00000 521.00000
400.00000 484.00000
361.00000 585.00000
363.00000 641.00000
IMAGE=CVGLab5F.jpg
ID=CVG3- 5F 
LM=19
427.00000 666.00000
606.00000 674.00000
721.00000 673.00000
1004.00000 635.00000
1083.00000 583.00000
1099.00000 566.00000
943.00000 474.00000
870.00000 508.00000
741.00000 452.00000
770.00000 397.00000
685.00000 572.00000
673.00000 595.00000
522.00000 615.00000
510.00000 589.00000
508.00000 565.00000
494.00000 566.00000
474.00000 532.00000
447.00000 620.00000
451.00000 670.00000
IMAGE=CVGLab5M.jpg
ID=CVG3- 5M 
LM=19
412.00000 644.00000
599.00000 655.00000
727.00000 655.00000
1026.00000 607.00000
1113.00000 544.00000
1125.00000 529.00000
976.00000 433.00000
902.00000 464.00000
767.00000 402.00000
807.00000 342.00000
702.00000 539.00000
690.00000 564.00000
516.00000 594.00000
499.00000 563.00000
499.00000 534.00000
484.00000 538.00000
462.00000 505.00000
434.00000 598.00000
436.00000 647.00000
IMAGE=CVGLab6F.jpg
ID=CVG3- 6F 
LM=19
362.00000 673.00000
583.00000 688.00000
730.00000 685.00000
1077.00000 622.00000
1167.00000 562.00000
1184.00000 542.00000
999.00000 443.00000
934.00000 478.00000
756.00000 405.00000
790.00000 339.00000
699.00000 558.00000
674.00000 592.00000
487.00000 613.00000
468.00000 577.00000
468.00000 545.00000
452.00000 544.00000
423.00000 507.00000
393.00000 619.00000
394.00000 678.00000
IMAGE=CVGLab6M.jpg
ID=CVG3- 6M 
LM=19
324.00000 707.00000
549.00000 731.00000
702.00000 728.00000
1060.00000 683.00000
1161.00000 626.00000
1178.00000 611.00000
991.00000 491.00000
908.00000 521.00000
757.00000 433.00000
799.00000 363.00000
644.00000 597.00000
632.00000 627.00000
447.00000 650.00000
432.00000 614.00000
435.00000 580.00000
417.00000 583.00000
392.00000 542.00000
353.00000 655.00000
355.00000 713.00000
IMAGE=CVGLab7F.jpg
ID=CVG3- 7F 
LM=19
382.00000 683.00000
598.00000 696.00000
748.00000 692.00000
1080.00000 651.00000
1176.00000 594.00000
1198.00000 570.00000
1007.00000 464.00000
935.00000 494.00000
765.00000 420.00000
808.00000 358.00000
711.00000 569.00000
692.00000 598.00000
503.00000 623.00000
482.00000 588.00000
481.00000 558.00000
463.00000 560.00000
439.00000 523.00000
406.00000 632.00000
412.00000 687.00000
IMAGE=CVGLab7M.jpg
ID=CVG3- 7M 
LM=19
329.00000 680.00000
551.00000 703.00000
708.00000 705.00000
1078.00000 658.00000
1178.00000 594.00000
1198.00000 574.00000
1002.00000 448.00000
932.00000 475.00000
763.00000 389.00000
809.00000 319.00000
667.00000 561.00000
650.00000 595.00000
452.00000 621.00000
434.00000 582.00000
435.00000 553.00000
417.00000 554.00000
392.00000 513.00000
357.00000 624.00000
363.00000 686.00000
IMAGE=CVGLab8F.jpg
ID=CVG3- 8F 
LM=19
357.00000 691.00000
581.00000 700.00000
741.00000 700.00000
1089.00000 656.00000
1176.00000 600.00000
1198.00000 578.00000
1007.00000 463.00000
935.00000 496.00000
749.00000 411.00000
784.00000 348.00000
684.00000 575.00000
666.00000 605.00000
479.00000 628.00000
456.00000 593.00000
457.00000 562.00000
440.00000 563.00000
412.00000 528.00000
382.00000 636.00000
387.00000 694.00000
IMAGE=CVGLab8M.jpg
ID=CVG3- 8M 
LM=19
377.00000 676.00000
580.00000 686.00000
711.00000 685.00000
1031.00000 638.00000
1115.00000 588.00000
1130.00000 576.00000
974.00000 461.00000
913.00000 486.00000
762.00000 411.00000
797.00000 348.00000
676.00000 562.00000
664.00000 587.00000
486.00000 616.00000
471.00000 584.00000
474.00000 556.00000
458.00000 558.00000
434.00000 523.00000
404.00000 622.00000
405.00000 678.00000
IMAGE=CVGLab9F.jpg
ID=CVG3- 9F 
LM=19
362.00000 666.00000
580.00000 679.00000
734.00000 677.00000
1071.00000 631.00000
1165.00000 572.00000
1188.00000 550.00000
988.00000 439.00000
921.00000 470.00000
747.00000 390.00000
784.00000 326.00000
695.00000 547.00000
676.00000 581.00000
482.00000 605.00000
462.00000 573.00000
459.00000 541.00000
440.00000 543.00000
417.00000 505.00000
388.00000 614.00000
389.00000 670.00000
IMAGE=CVGLab9M.jpg
ID=CVG3- 9M 
LM=19
346.00000 670.00000
582.00000 688.00000
734.00000 684.00000
1102.00000 651.00000
1208.00000 580.00000
1227.00000 556.00000
1022.00000 442.00000
957.00000 471.00000
795.00000 377.00000
841.00000 302.00000
711.00000 544.00000
686.00000 584.00000
472.00000 607.00000
450.00000 573.00000
453.00000 542.00000
437.00000 542.00000
414.00000 504.00000
367.00000 614.00000
377.00000 675.00000
IMAGE=CVE3Field10F.jpg
ID=CVE6-10F
LM=19
421.00000 664.00000
631.00000 676.00000
776.00000 676.00000
1072.00000 637.00000
1167.00000 570.00000
1181.00000 547.00000
1004.00000 480.00000
935.00000 511.00000
796.00000 434.00000
838.00000 376.00000
724.00000 567.00000
705.00000 593.00000
531.00000 606.00000
512.00000 575.00000
514.00000 546.00000
498.00000 550.00000
479.00000 512.00000
438.00000 609.00000
449.00000 667.00000
IMAGE=CVE3Field11M.jpg
ID=CVE6-11M 
LM=19
298.00000 692.00000
552.00000 705.00000
725.00000 705.00000
1110.00000 665.00000
1219.00000 602.00000
1243.00000 578.00000
1031.00000 458.00000
953.00000 491.00000
793.00000 388.00000
839.00000 313.00000
672.00000 564.00000
647.00000 598.00000
437.00000 627.00000
414.00000 589.00000
420.00000 553.00000
400.00000 555.00000
371.00000 515.00000
327.00000 633.00000
324.00000 696.00000
IMAGE=CVE3Field12F.jpg
ID=CVE6-12M 
LM=19
386.00000 664.00000
613.00000 676.00000
764.00000 673.00000
1090.00000 635.00000
1188.00000 570.00000
1204.00000 545.00000
1005.00000 450.00000
924.00000 486.00000
763.00000 395.00000
809.00000 327.00000
714.00000 549.00000
693.00000 578.00000
505.00000 598.00000
485.00000 562.00000
486.00000 532.00000
469.00000 537.00000
444.00000 494.00000
409.00000 605.00000
418.00000 668.00000
IMAGE=CVE3Field13M.jpg
ID=CVE6-13M 
LM=19
373.00000 680.00000
583.00000 691.00000
718.00000 685.00000
1031.00000 655.00000
1116.00000 598.00000
1136.00000 572.00000
967.00000 473.00000
896.00000 505.00000
756.00000 433.00000
793.00000 371.00000
678.00000 577.00000
660.00000 603.00000
485.00000 620.00000
465.00000 591.00000
468.00000 562.00000
452.00000 566.00000
428.00000 524.00000
399.00000 629.00000
404.00000 685.00000
IMAGE=CVE3Field14M.jpg
ID=CVE6-14M 
LM=19
374.00000 643.00000
609.00000 655.00000
761.00000 653.00000
1091.00000 603.00000
1184.00000 533.00000
1200.00000 513.00000
1024.00000 416.00000
951.00000 448.00000
800.00000 359.00000
842.00000 292.00000
714.00000 518.00000
695.00000 552.00000
489.00000 579.00000
477.00000 546.00000
483.00000 516.00000
466.00000 518.00000
444.00000 482.00000
398.00000 586.00000
404.00000 647.00000
IMAGE=CVE3Field15F.jpg
ID=CVE6-15F 
LM=19
397.00000 627.00000
594.00000 645.00000
720.00000 644.00000
1005.00000 613.00000
1095.00000 551.00000
1108.00000 528.00000
940.00000 449.00000
880.00000 473.00000
757.00000 397.00000
792.00000 328.00000
701.00000 527.00000
682.00000 558.00000
497.00000 579.00000
480.00000 550.00000
485.00000 523.00000
470.00000 531.00000
453.00000 494.00000
418.00000 580.00000
426.00000 632.00000
IMAGE=CVE3Field16F.jpg
ID=CVE6-16F 
LM=19
326.00000 683.00000
565.00000 699.00000
735.00000 691.00000
1098.00000 637.00000
1195.00000 564.00000
1209.00000 540.00000
1023.00000 434.00000
941.00000 474.00000
783.00000 372.00000
826.00000 299.00000
690.00000 552.00000
664.00000 585.00000
450.00000 617.00000
434.00000 581.00000
441.00000 547.00000
422.00000 551.00000
397.00000 511.00000
350.00000 625.00000
361.00000 688.00000
IMAGE=CVE3Field17F.jpg
ID=CVE6-17F 
LM=19
394.00000 665.00000
622.00000 670.00000
773.00000 670.00000
1116.00000 638.00000
1227.00000 569.00000
1238.00000 545.00000
1054.00000 449.00000
990.00000 475.00000
844.00000 376.00000
881.00000 310.00000
749.00000 549.00000
725.00000 577.00000
513.00000 594.00000
491.00000 565.00000
495.00000 532.00000
479.00000 534.00000
451.00000 497.00000
410.00000 606.00000
419.00000 666.00000
IMAGE=CVE3Field18F.jpg
ID=CVE6-18F 
LM=19
320.00000 709.00000
581.00000 723.00000
756.00000 721.00000
1133.00000 677.00000
1237.00000 603.00000
1258.00000 577.00000
1038.00000 455.00000
963.00000 494.00000
800.00000 398.00000
837.00000 310.00000
701.00000 579.00000
674.00000 618.00000
459.00000 645.00000
430.00000 616.00000
440.00000 582.00000
423.00000 585.00000
398.00000 538.00000
347.00000 650.00000
353.00000 712.00000
IMAGE=CVE3Field19F.jpg
ID=CVE6-19F 
LM=19
335.00000 723.00000
564.00000 736.00000
722.00000 727.00000
1119.00000 684.00000
1224.00000 614.00000
1241.00000 590.00000
1038.00000 497.00000
953.00000 531.00000
788.00000 426.00000
838.00000 348.00000
712.00000 598.00000
689.00000 630.00000
463.00000 656.00000
444.00000 622.00000
445.00000 589.00000
428.00000 594.00000
401.00000 549.00000
362.00000 661.00000
362.00000 727.00000
IMAGE=CVE3Field1F.jpg
ID=CVE6- 1F
LM=19
374.00000 688.00000
597.00000 703.00000
743.00000 703.00000
1097.00000 661.00000
1193.00000 592.00000
1205.00000 574.00000
1023.00000 474.00000
948.00000 504.00000
797.00000 422.00000
836.00000 347.00000
716.00000 576.00000
694.00000 609.00000
497.00000 631.00000
480.00000 599.00000
485.00000 567.00000
469.00000 573.00000
445.00000 530.00000
401.00000 632.00000
410.00000 692.00000
IMAGE=CVE3Field2F.jpg
ID=CVE6- 2F 
LM=19
357.00000 662.00000
611.00000 682.00000
775.00000 679.00000
1134.00000 630.00000
1237.00000 549.00000
1250.00000 520.00000
1063.00000 449.00000
988.00000 495.00000
826.00000 393.00000
878.00000 328.00000
714.00000 558.00000
696.00000 581.00000
495.00000 597.00000
479.00000 563.00000
483.00000 532.00000
463.00000 534.00000
441.00000 490.00000
391.00000 602.00000
386.00000 669.00000
IMAGE=CVE3Field3F.jpg
ID=CVE6- 3F 
LM=19
357.00000 684.00000
595.00000 697.00000
749.00000 695.00000
1087.00000 648.00000
1185.00000 567.00000
1195.00000 549.00000
1010.00000 451.00000
945.00000 482.00000
799.00000 404.00000
839.00000 332.00000
722.00000 569.00000
701.00000 598.00000
489.00000 622.00000
468.00000 588.00000
474.00000 558.00000
458.00000 560.00000
434.00000 518.00000
385.00000 628.00000
388.00000 687.00000
IMAGE=CVE3Field4F.jpg
ID=CVE6- 4F 
LM=19
379.00000 677.00000
588.00000 682.00000
733.00000 682.00000
1069.00000 642.00000
1164.00000 574.00000
1176.00000 559.00000
992.00000 461.00000
917.00000 497.00000
780.00000 404.00000
815.00000 336.00000
709.00000 564.00000
689.00000 593.00000
495.00000 613.00000
477.00000 579.00000
478.00000 549.00000
462.00000 553.00000
445.00000 518.00000
404.00000 619.00000
405.00000 679.00000
IMAGE=CVE3Field5F.jpg
ID=CVE6- 5F 
LM=19
432.00000 640.00000
597.00000 650.00000
702.00000 651.00000
956.00000 623.00000
1039.00000 558.00000
1048.00000 545.00000
909.00000 482.00000
854.00000 503.00000
743.00000 438.00000
777.00000 392.00000
685.00000 558.00000
668.00000 578.00000
521.00000 594.00000
505.00000 573.00000
506.00000 549.00000
492.00000 557.00000
477.00000 525.00000
450.00000 598.00000
458.00000 642.00000
IMAGE=CVE3Field6F.jpg
ID=CVE6- 6F 
LM=19
396.00000 658.00000
617.00000 668.00000
762.00000 664.00000
1088.00000 612.00000
1182.00000 544.00000
1197.00000 524.00000
1028.00000 422.00000
952.00000 456.00000
809.00000 368.00000
841.00000 299.00000
712.00000 534.00000
691.00000 569.00000
502.00000 596.00000
487.00000 564.00000
493.00000 535.00000
477.00000 528.00000
454.00000 499.00000
418.00000 603.00000
423.00000 659.00000
IMAGE=CVE3Field7F.jpg
ID=CVE6- 7F 
LM=19
407.00000 655.00000
637.00000 676.00000
779.00000 675.00000
1113.00000 635.00000
1200.00000 564.00000
1215.00000 547.00000
1034.00000 461.00000
965.00000 496.00000
827.00000 409.00000
864.00000 337.00000
749.00000 560.00000
724.00000 589.00000
530.00000 605.00000
514.00000 578.00000
517.00000 552.00000
500.00000 556.00000
479.00000 512.00000
443.00000 613.00000
443.00000 665.00000
IMAGE=CVE3Field8F.jpg
ID=CVE6- 8F 
LM=19
343.00000 692.00000
588.00000 703.00000
745.00000 696.00000
1097.00000 641.00000
1188.00000 560.00000
1201.00000 536.00000
1000.00000 441.00000
939.00000 472.00000
780.00000 384.00000
818.00000 309.00000
694.00000 563.00000
668.00000 594.00000
468.00000 622.00000
447.00000 586.00000
454.00000 557.00000
433.00000 561.00000
409.00000 518.00000
368.00000 632.00000
373.00000 695.00000
IMAGE=CVE3Field9F.jpg
ID=CVE6- 9F 
LM=19
389.00000 618.00000
598.00000 635.00000
731.00000 631.00000
1044.00000 588.00000
1136.00000 522.00000
1150.00000 503.00000
977.00000 417.00000
909.00000 446.00000
768.00000 362.00000
817.00000 302.00000
694.00000 506.00000
670.00000 538.00000
492.00000 557.00000
481.00000 528.00000
483.00000 498.00000
466.00000 501.00000
444.00000 468.00000
413.00000 560.00000
416.00000 620.00000
IMAGE=CVSwit10F.jpg
ID=CVS8-10F 
LM=19
366.00000 664.00000
587.00000 668.00000
741.00000 668.00000
1098.00000 623.00000
1198.00000 547.00000
1216.00000 519.00000
1006.00000 435.00000
932.00000 470.00000
784.00000 392.00000
833.00000 313.00000
696.00000 552.00000
676.00000 579.00000
480.00000 602.00000
459.00000 571.00000
463.00000 547.00000
446.00000 550.00000
429.00000 513.00000
388.00000 608.00000
396.00000 668.00000
IMAGE=CVSwit1F.jpg
ID=CVS8- 1F 
LM=19
354.00000 662.00000
556.00000 677.00000
707.00000 678.00000
1032.00000 648.00000
1128.00000 584.00000
1146.00000 562.00000
963.00000 463.00000
895.00000 496.00000
758.00000 409.00000
799.00000 343.00000
676.00000 560.00000
651.00000 586.00000
468.00000 607.00000
448.00000 575.00000
451.00000 551.00000
436.00000 553.00000
420.00000 517.00000
383.00000 610.00000
383.00000 668.00000
IMAGE=CVSwit2F.jpg
ID=CVS8- 2F 
LM=19
353.00000 688.00000
598.00000 702.00000
761.00000 700.00000
1127.00000 648.00000
1229.00000 556.00000
1243.00000 530.00000
1047.00000 445.00000
969.00000 481.00000
808.00000 390.00000
848.00000 314.00000
717.00000 565.00000
694.00000 596.00000
474.00000 620.00000
454.00000 588.00000
464.00000 555.00000
444.00000 558.00000
421.00000 517.00000
374.00000 627.00000
390.00000 690.00000
IMAGE=CVSwit3F.jpg
ID=CVS8- 3F 
LM=19
331.00000 680.00000
587.00000 696.00000
755.00000 697.00000
1132.00000 652.00000
1239.00000 582.00000
1259.00000 558.00000
1060.00000 434.00000
973.00000 471.00000
817.00000 367.00000
869.00000 283.00000
705.00000 554.00000
684.00000 588.00000
467.00000 614.00000
444.00000 578.00000
450.00000 543.00000
433.00000 546.00000
404.00000 505.00000
375.00000 616.00000
365.00000 682.00000
IMAGE=CVSwit4F.jpg
ID=CVS8- 4F 
LM=19
348.00000 670.00000
552.00000 688.00000
701.00000 688.00000
1031.00000 653.00000
1126.00000 588.00000
1139.00000 567.00000
967.00000 471.00000
892.00000 501.00000
753.00000 414.00000
794.00000 350.00000
676.00000 567.00000
652.00000 594.00000
459.00000 614.00000
442.00000 585.00000
447.00000 558.00000
430.00000 563.00000
413.00000 528.00000
373.00000 619.00000
379.00000 673.00000
IMAGE=CVSwit5F.jpg
ID=CVS8- 5F 
LM=19
383.00000 681.00000
596.00000 689.00000
747.00000 688.00000
1064.00000 640.00000
1161.00000 571.00000
1174.00000 552.00000
1004.00000 461.00000
940.00000 489.00000
793.00000 408.00000
836.00000 340.00000
719.00000 566.00000
696.00000 598.00000
494.00000 623.00000
476.00000 592.00000
478.00000 564.00000
463.00000 566.00000
443.00000 532.00000
406.00000 629.00000
413.00000 683.00000
IMAGE=CVSwit6F.jpg
ID=CVS8- 6F 
LM=19
380.00000 665.00000
578.00000 677.00000
713.00000 677.00000
1007.00000 640.00000
1095.00000 584.00000
1109.00000 568.00000
953.00000 468.00000
881.00000 498.00000
753.00000 423.00000
789.00000 365.00000
669.00000 561.00000
649.00000 590.00000
480.00000 611.00000
466.00000 583.00000
468.00000 559.00000
453.00000 563.00000
435.00000 532.00000
404.00000 616.00000
410.00000 668.00000
IMAGE=CVSwit7F.jpg
ID=CVS8- 7F 
LM=19
367.00000 647.00000
596.00000 663.00000
766.00000 660.00000
1094.00000 623.00000
1194.00000 553.00000
1213.00000 530.00000
1021.00000 418.00000
945.00000 457.00000
800.00000 366.00000
846.00000 301.00000
708.00000 534.00000
684.00000 562.00000
486.00000 586.00000
469.00000 556.00000
470.00000 524.00000
454.00000 517.00000
433.00000 488.00000
394.00000 592.00000
397.00000 651.00000
IMAGE=CVSwit8F.jpg
ID=CVS8- 8F 
LM=19
359.00000 691.00000
574.00000 701.00000
721.00000 700.00000
1060.00000 663.00000
1162.00000 598.00000
1180.00000 575.00000
1006.00000 476.00000
921.00000 510.00000
773.00000 414.00000
818.00000 345.00000
687.00000 571.00000
664.00000 605.00000
467.00000 627.00000
448.00000 597.00000
453.00000 567.00000
435.00000 560.00000
419.00000 533.00000
385.00000 633.00000
389.00000 694.00000
IMAGE=CVSwit9F.jpg
ID=CVS8- 9F 
LM=19
346.00000 670.00000
582.00000 688.00000
734.00000 684.00000
1102.00000 651.00000
1208.00000 580.00000
1227.00000 556.00000
1022.00000 442.00000
957.00000 471.00000
795.00000 377.00000
841.00000 302.00000
711.00000 544.00000
686.00000 584.00000
472.00000 607.00000
450.00000 573.00000
453.00000 542.00000
437.00000 542.00000
414.00000 504.00000
367.00000 614.00000
377.00000 675.00000
IMAGE=CVE3Field10F.jpg
ID=CVE6-10F 
LM=19
421.00000 664.00000
631.00000 676.00000
776.00000 676.00000
1072.00000 637.00000
1167.00000 570.00000
1181.00000 547.00000
1004.00000 480.00000
935.00000 511.00000
796.00000 434.00000
838.00000 376.00000
724.00000 567.00000
705.00000 593.00000
531.00000 606.00000
512.00000 575.00000
514.00000 546.00000
496.00000 540.00000
479.00000 512.00000
438.00000 609.00000
449.00000 667.00000
IMAGE=CVE3Field11M.jpg
ID=CVE6-11M 
LM=19
298.00000 692.00000
552.00000 705.00000
725.00000 705.00000
1110.00000 665.00000
1219.00000 602.00000
1243.00000 578.00000
1031.00000 458.00000
953.00000 491.00000
793.00000 388.00000
839.00000 313.00000
672.00000 564.00000
647.00000 598.00000
437.00000 627.00000
414.00000 589.00000
420.00000 553.00000
397.00000 544.00000
371.00000 515.00000
327.00000 633.00000
324.00000 696.00000
IMAGE=CVE3Field12F.jpg
ID=CVE6-12F 
LM=19
386.00000 664.00000
613.00000 676.00000
764.00000 673.00000
1090.00000 635.00000
1188.00000 570.00000
1204.00000 545.00000
1005.00000 450.00000
924.00000 486.00000
763.00000 395.00000
809.00000 327.00000
714.00000 549.00000
693.00000 578.00000
505.00000 598.00000
485.00000 562.00000
486.00000 532.00000
469.00000 524.00000
444.00000 494.00000
409.00000 605.00000
418.00000 668.00000
IMAGE=CVE3Field13M.jpg
ID=CVE6-13M 
LM=19
370.00000 680.00000
583.00000 689.00000
716.00000 685.00000
1030.00000 656.00000
1117.00000 596.00000
1135.00000 573.00000
966.00000 474.00000
895.00000 506.00000
755.00000 433.00000
792.00000 371.00000
679.00000 576.00000
658.00000 605.00000
482.00000 621.00000
468.00000 590.00000
468.00000 560.00000
453.00000 555.00000
428.00000 526.00000
395.00000 630.00000
403.00000 685.00000
IMAGE=CVE3Field14M.jpg
ID=CVE6-14M 
LM=19
372.00000 643.00000
608.00000 655.00000
759.00000 654.00000
1092.00000 601.00000
1184.00000 532.00000
1200.00000 513.00000
1021.00000 416.00000
950.00000 447.00000
799.00000 359.00000
843.00000 289.00000
716.00000 516.00000
696.00000 553.00000
489.00000 580.00000
476.00000 546.00000
483.00000 516.00000
465.00000 508.00000
444.00000 480.00000
400.00000 585.00000
403.00000 646.00000
IMAGE=CVE3Field15F.jpg
ID=CVE6-15F 
LM=19
398.00000 627.00000
594.00000 643.00000
719.00000 644.00000
1004.00000 614.00000
1096.00000 551.00000
1110.00000 529.00000
941.00000 447.00000
881.00000 472.00000
758.00000 398.00000
793.00000 327.00000
700.00000 528.00000
683.00000 558.00000
495.00000 577.00000
482.00000 550.00000
485.00000 526.00000
471.00000 530.00000
454.00000 493.00000
419.00000 579.00000
424.00000 630.00000
IMAGE=CVE3Field16F.jpg
ID=CVE6-16F 
LM=19
326.00000 684.00000
564.00000 697.00000
737.00000 691.00000
1099.00000 639.00000
1196.00000 563.00000
1209.00000 539.00000
1023.00000 433.00000
941.00000 472.00000
784.00000 371.00000
827.00000 301.00000
690.00000 551.00000
663.00000 585.00000
447.00000 615.00000
435.00000 582.00000
439.00000 549.00000
422.00000 552.00000
396.00000 513.00000
350.00000 623.00000
362.00000 687.00000
IMAGE=CVE3Field17F.jpg
ID=CVE6-17F 
LM=19
392.00000 665.00000
620.00000 670.00000
773.00000 670.00000
1116.00000 639.00000
1223.00000 572.00000
1234.00000 551.00000
1054.00000 451.00000
992.00000 475.00000
842.00000 374.00000
880.00000 306.00000
748.00000 547.00000
726.00000 573.00000
514.00000 594.00000
492.00000 563.00000
495.00000 528.00000
480.00000 531.00000
453.00000 494.00000
413.00000 604.00000
422.00000 667.00000
IMAGE=CVE3Field18F.jpg
ID=CVE6-18F 
LM=19
320.00000 711.00000
581.00000 724.00000
758.00000 724.00000
1131.00000 677.00000
1238.00000 603.00000
1256.00000 578.00000
1039.00000 455.00000
962.00000 493.00000
800.00000 397.00000
839.00000 312.00000
700.00000 578.00000
674.00000 616.00000
455.00000 644.00000
432.00000 609.00000
441.00000 582.00000
424.00000 582.00000
399.00000 539.00000
347.00000 649.00000
351.00000 714.00000
IMAGE=CVE3Field19F.jpg
ID=CVE6-19F 
LM=19
332.00000 721.00000
564.00000 735.00000
723.00000 728.00000
1118.00000 685.00000
1223.00000 613.00000
1241.00000 591.00000
1041.00000 497.00000
952.00000 530.00000
787.00000 425.00000
839.00000 348.00000
711.00000 599.00000
690.00000 629.00000
461.00000 656.00000
445.00000 621.00000
446.00000 590.00000
427.00000 592.00000
403.00000 549.00000
361.00000 661.00000
361.00000 726.00000
IMAGE=CVE3Field1F.jpg
ID=CVE6- 1F 
LM=19
374.00000 689.00000
601.00000 702.00000
743.00000 703.00000
1096.00000 662.00000
1191.00000 594.00000
1206.00000 573.00000
1021.00000 474.00000
950.00000 505.00000
797.00000 421.00000
835.00000 347.00000
716.00000 576.00000
695.00000 609.00000
501.00000 630.00000
482.00000 598.00000
482.00000 567.00000
468.00000 571.00000
447.00000 532.00000
404.00000 633.00000
408.00000 693.00000
IMAGE=CVE3Field2F.jpg
ID=CVE6- 2F 
LM=19
356.00000 664.00000
608.00000 679.00000
768.00000 678.00000
1136.00000 629.00000
1236.00000 548.00000
1250.00000 519.00000
1061.00000 454.00000
987.00000 494.00000
824.00000 393.00000
880.00000 326.00000
716.00000 558.00000
697.00000 584.00000
501.00000 597.00000
478.00000 568.00000
486.00000 531.00000
465.00000 531.00000
439.00000 490.00000
387.00000 603.00000
385.00000 668.00000
IMAGE=CVE3Field3F.jpg
ID=CVE6- 3F 
LM=19
357.00000 684.00000
597.00000 698.00000
747.00000 693.00000
1086.00000 649.00000
1186.00000 567.00000
1194.00000 549.00000
1009.00000 450.00000
948.00000 483.00000
800.00000 404.00000
838.00000 333.00000
724.00000 569.00000
700.00000 597.00000
489.00000 618.00000
469.00000 591.00000
472.00000 558.00000
455.00000 560.00000
436.00000 517.00000
381.00000 628.00000
385.00000 687.00000
IMAGE=CVE3Field4F.jpg
ID=CVE6- 4F 
LM=19
377.00000 676.00000
592.00000 683.00000
733.00000 681.00000
1067.00000 640.00000
1164.00000 575.00000
1177.00000 557.00000
990.00000 462.00000
916.00000 497.00000
782.00000 402.00000
815.00000 337.00000
709.00000 565.00000
691.00000 591.00000
492.00000 611.00000
479.00000 580.00000
479.00000 549.00000
463.00000 555.00000
446.00000 518.00000
402.00000 619.00000
406.00000 677.00000
IMAGE=CVE3Field5F.jpg
ID=CVE6- 5F 
LM=19
432.00000 639.00000
597.00000 650.00000
700.00000 650.00000
954.00000 621.00000
1040.00000 557.00000
1047.00000 547.00000
908.00000 482.00000
854.00000 503.00000
744.00000 439.00000
776.00000 392.00000
684.00000 555.00000
667.00000 578.00000
521.00000 593.00000
505.00000 572.00000
508.00000 549.00000
495.00000 554.00000
478.00000 524.00000
452.00000 598.00000
456.00000 642.00000
IMAGE=CVE3Field6F.jpg
ID=CVE6- 6F 
LM=19
396.00000 657.00000
616.00000 666.00000
762.00000 662.00000
1088.00000 611.00000
1180.00000 544.00000
1195.00000 526.00000
1028.00000 419.00000
953.00000 456.00000
808.00000 368.00000
844.00000 301.00000
712.00000 536.00000
690.00000 568.00000
502.00000 595.00000
487.00000 563.00000
495.00000 533.00000
478.00000 537.00000
455.00000 500.00000
417.00000 605.00000
424.00000 659.00000
IMAGE=CVE3Field7F.jpg
ID=CVE6- 7F 
LM=19
416.00000 665.00000
636.00000 678.00000
781.00000 676.00000
1114.00000 634.00000
1200.00000 568.00000
1215.00000 546.00000
1035.00000 462.00000
966.00000 497.00000
827.00000 409.00000
864.00000 339.00000
747.00000 561.00000
723.00000 588.00000
531.00000 605.00000
513.00000 577.00000
519.00000 548.00000
503.00000 555.00000
481.00000 514.00000
440.00000 613.00000
447.00000 667.00000
IMAGE=CVE3Field8F.jpg
ID=CVE6- 8F 
LM=19
343.00000 692.00000
587.00000 703.00000
743.00000 696.00000
1096.00000 642.00000
1188.00000 560.00000
1201.00000 534.00000
999.00000 439.00000
938.00000 471.00000
778.00000 384.00000
817.00000 308.00000
694.00000 561.00000
670.00000 594.00000
472.00000 621.00000
448.00000 586.00000
453.00000 558.00000
436.00000 564.00000
409.00000 519.00000
367.00000 632.00000
374.00000 696.00000
IMAGE=CVE3Field9F.jpg
ID=CVE6- 9F 
